# Supplementary material for: Catalyst-controlled cycloisomerization/[4 + 3] cycloaddition sequence to construct 2,3-furan-fused dihydroazepines and 2,3-pyrrole-fused dihydrooxepines
Source: Royal Society of Chemistry journal article supplement (doi:10.1039/d1qo01733k), 2022-01-01
Supplement: d1qo01733k1.pdf [file d1qo01733k1.pdf]

## Supporting Information

### Table of Contents

|    |                                                                               |     |
|----|-------------------------------------------------------------------------------|-----|
| 1. | General Information                                                           | S2  |
| 2. | General procedure for the synthesis of substrates and products                | S3  |
| 3. | General procedure for the chiral control and the transformations of <b>3a</b> | S4  |
| 4. | Reference                                                                     | S5  |
| 5. | Crystal structures of <b>3a</b> , <b>5d</b> , <b>8</b>                        | S6  |
| 6. | Characterization of substrates and products                                   | S10 |
| 7. | <sup>1</sup> H NMR, <sup>13</sup> C NMR and HPLC Spectra                      | S26 |

## 1. General Information

Commercially available materials purchased from Bidepharm or Energy Chemical was used as received. DCE was newly distilled over CaH<sub>2</sub>. Unless otherwise specified, all reactions were carried out under an atmosphere of nitrogen in 10 mL Schlenk tube.

<sup>1</sup>H NMR, <sup>13</sup>C NMR spectra were measured at 400 MHz and 151 MHz in CDCl<sub>3</sub>. Data for <sup>1</sup>H NMR spectra are reported as follows: chemical shift (ppm, referenced to TMS; s = singlet, d = doublet, t = triplet, dd = doublet of doublets, dt = doublet of triplets, m = multiplet), coupling constant (Hz), and integration. Data for <sup>13</sup>C NMR are reported in terms of chemical shift (ppm) relative to residual solvent peak (CDCl<sub>3</sub>: 77.16 ppm). High-resolution mass spectrometry (HRMS) analysis was carried out using a TOF MS instrument with ESI.

Reactions were monitored by thin layer chromatography (TLC) using silicycle pre-coated silica gel plates. Flash column chromatography was performed on silica gel 60 (particle size 200-300 mesh ASTM, purchased from Anhui Liangchen Silicon Material Co., Ltd.) and eluted with petroleum ether/ethyl acetate. Ynamides were prepared according to previous literature procedures.<sup>[1,2]</sup> Crotonate-derived sulfur ylides were prepared from dimethyl sulfide and 4-bromocrotonate according to the literature.<sup>[3]</sup>

## 2. General procedure for the synthesis of substrates and products

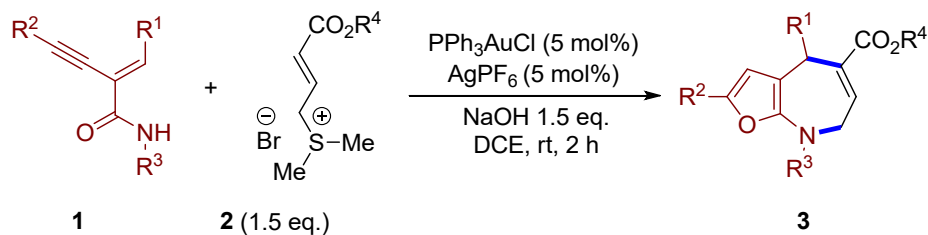

In a dried and nitrogen filled Schlenk flask, a mixture of PPh<sub>3</sub>AuCl (5.0 mg, 0.01 mmol, 5 mol %), AgPF<sub>6</sub> (2.5 mg, 0.01 mmol, 5 mol %) in DCE (2 mL) was stirred at room temperature under nitrogen for 15 mins to generate the gold catalyst. Immediately afterwards, ynamide (0.2 mmol, 1 equiv) was added to the above catalyst solution and stirred for 0.5 h to gain the intermediate. Then crotonate-derived sulfur ylide (0.3 mmol, 1.5 equiv) and NaOH (12 mg, 0.3 mmol, 1.5 equiv) were added. After that the mixture was stirred at room temperature until the reaction was complete (2 h, determined by TLC analysis). The mixture was concentrated under vacuum and purified by column chromatography on silica gel (hexanes:EtOAc = 8:1 to 20:1) to give the desired products **3** in good yields. All the products were confirmed by <sup>1</sup>H NMR, <sup>13</sup>C NMR spectra.

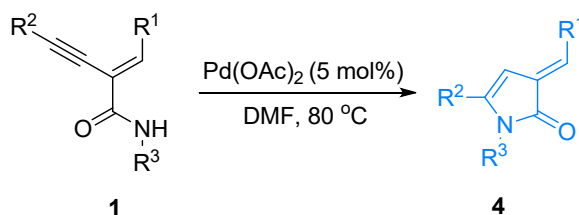

Under a nitrogen atmosphere, a mixture of ynamide (20 mmol), Pd(OAc)<sub>2</sub> (5 mol %) in DMF (20 mL) was stirred at 80 °C in a dry Schlenk tube for 8 h. The mixture was quenched with water, extracted with EA, dried over Na<sub>2</sub>SO<sub>4</sub>, and concentrated. The obtained residue was purified by silica gel column chromatography (hexanes:EtOAc = 17:1) to afford the desired intermediate.

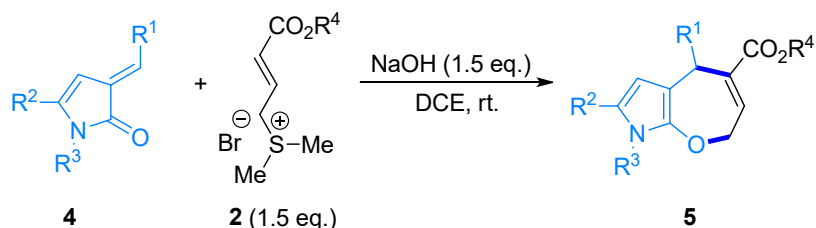

A mixture of intermediate **4** (0.2 mmol, 1.0 equiv), crotonate-derived sulfur ylide **2** (0.3 mmol, 1.5 equiv), and NaOH (12 mg, 0.3 mmol, 1.5 equiv) was stirred in 2 mL DCE at room temperature. The mixture was stirred at room temperature until the reaction was complete (2 h, determined by TLC analysis). The mixture was concentrated under vacuum and purified by column chromatography on silica gel (hexanes:EtOAc = 15:1) to give the desired products.

### 3. General procedure for the transformations of **3a**.

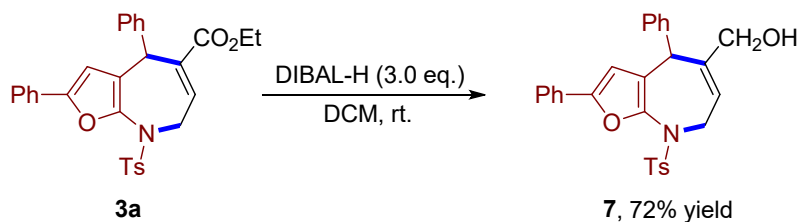

To a dry Schlenk tube with a magnetic stir bar, was added **3a** (0.15 mmol) and freshly distilled 1.5 mL DCM. Then slowly added diisobutyl aluminium hydride (DIBAL-H, 0.45 mmol) to the system. This solution was stirred at room temperature for 20 minutes until the **3a** was complete consumed (monitored by TLC). The mixture was concentrated under reduced pressure. The resulting crude residue was purified via column chromatography on silica gel (petroleum ether/ethyl acetate = 8:1) to afford the desired product **7** with 72% (51.2 mg) yield

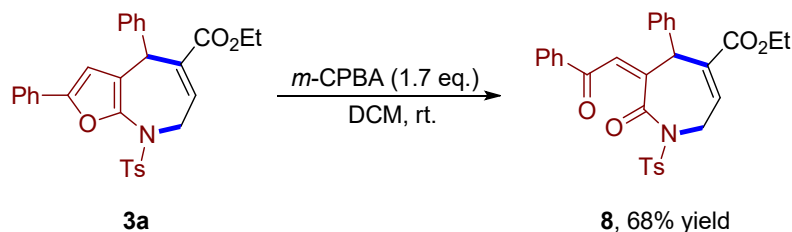

To a dry Schlenk tube with a magnetic stir bar, was added **3a** (0.10 mmol), *m*-CPBA (0.17 mmol) and freshly distilled 1.0 mL DCM. This solution was stirred at room temperature until the **3a** was complete consumed (monitored by TLC). Then, the reaction was quenched with a saturated solution of  $\text{NaHCO}_3$  (10 mL), and extracted with EtOAc (10 mL $\times$ 3). The organic extracts were combined and dried over  $\text{Na}_2\text{SO}_4$  and concentrated under reduced pressure. The resulting crude residue was purified via column chromatography on silica gel (petroleum ether/ethyl acetate = 10:1) to afford the desired product **8** with 68% (36.0 mg) yield.

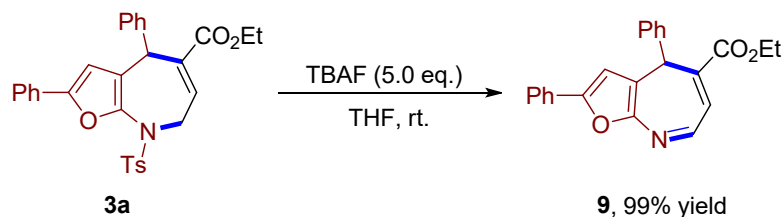

To a dry Schlenk tube with a magnetic stir bar, was added **3a** (0.1 mmol) and freshly distilled 2.0 mL THF. Then slowly added tetrabutylammonium fluoride (TBAF, 0.5 mmol) to the system. This solution was stirred at room temperature for 10 minutes until the **3a** was complete consumed (monitored by TLC). The mixture was concentrated under reduced pressure. The resulting crude residue was purified via column chromatography on silica gel (petroleum ether/ethyl acetate = 8:1) to give the desired product **9** with 99% (35.4 mg) yield.

#### 4. Reference

- [1] R. Rossi, F. Bellina, C. Bechini, L. Mannina, P. Vergamini, *Tetrahedron* **1998**, *54*, 135.
- [2] Y. Luo, K.-M. Qiu, X. Lu, K. Liu, J. Fu, H.-L. Zhu, *Bioorg. Med. Chem.* **2011**, *19*, 4730.
- [3] W.-H. Yin, L. Fang, Z.-Y. Wang, F. Gao, Z.-F. Li, Z.-Y. Wang, *Org. Lett.* **2019**, *21*, 7361.

## 5. Crystal structures of 3a, 5d, 8

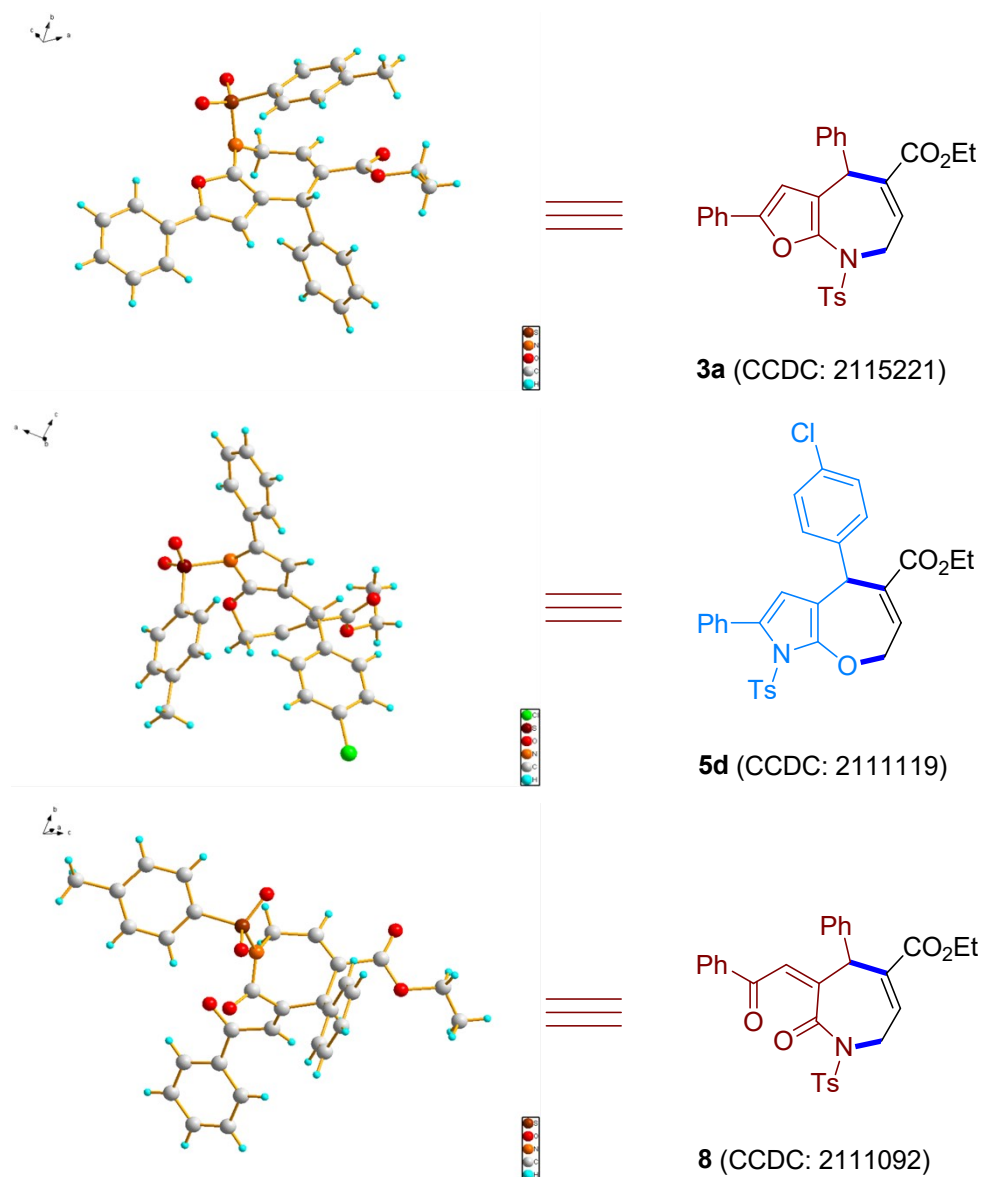

**Crystal data and structure refinement for 3a.**

|                                             |                                                               |
|---------------------------------------------|---------------------------------------------------------------|
| CCDC number                                 | 2115221                                                       |
| Identification code                         | 3a                                                            |
| Empirical formula                           | C <sub>30</sub> H <sub>27</sub> NO <sub>5</sub> S             |
| Formula weight                              | 513.58                                                        |
| Temperature/K                               | 160.00                                                        |
| Crystal system                              | triclinic                                                     |
| Space group                                 | P-1                                                           |
| a/Å                                         | 9.9307(5)                                                     |
| b/Å                                         | 10.1799(5)                                                    |
| c/Å                                         | 14.9440(7)                                                    |
| α/°                                         | 74.8085(17)                                                   |
| β/°                                         | 82.4440(17)                                                   |
| γ/°                                         | 63.8588(15)                                                   |
| Volume/Å <sup>3</sup>                       | 1308.59(11)                                                   |
| Z                                           | 2                                                             |
| ρ <sub>calc</sub> /g/cm <sup>3</sup>        | 1.303                                                         |
| μ/mm <sup>-1</sup>                          | 0.164                                                         |
| F(000)                                      | 540.0                                                         |
| Crystal size/mm <sup>3</sup>                | 0.28 × 0.24 × 0.2                                             |
| Radiation                                   | MoKα (λ = 0.71073)                                            |
| 2θ range for data collection/°              | 4.798 to 55.046                                               |
| Index ranges                                | -12 ≤ h ≤ 12, -12 ≤ k ≤ 13, -19 ≤ l ≤ 19                      |
| Reflections collected                       | 27629                                                         |
| Independent reflections                     | 5959 [R <sub>int</sub> = 0.1059, R <sub>sigma</sub> = 0.0525] |
| Data/restraints/parameters                  | 5959/0/334                                                    |
| Goodness-of-fit on F <sup>2</sup>           | 1.025                                                         |
| Final R indexes [I ≥ 2σ (I)]                | R <sub>1</sub> = 0.0476, wR <sub>2</sub> = 0.1267             |
| Final R indexes [all data]                  | R <sub>1</sub> = 0.0554, wR <sub>2</sub> = 0.1348             |
| Largest diff. peak/hole / e Å <sup>-3</sup> | 0.25/-0.30                                                    |

**Crystal data and structure refinement for 5d.**

|                                             |                                                               |
|---------------------------------------------|---------------------------------------------------------------|
| CCDC number                                 | 2111119                                                       |
| Identification code                         | 5d                                                            |
| Empirical formula                           | C <sub>30</sub> H <sub>26</sub> ClNO <sub>5</sub> S           |
| Formula weight                              | 548.03                                                        |
| Temperature/K                               | 273.15                                                        |
| Crystal system                              | monoclinic                                                    |
| Space group                                 | P2/n                                                          |
| a/Å                                         | 11.0616(5)                                                    |
| b/Å                                         | 11.8157(8)                                                    |
| c/Å                                         | 23.0833(15)                                                   |
| α/°                                         | 90                                                            |
| β/°                                         | 93.228(2)                                                     |
| γ/°                                         | 90                                                            |
| Volume/Å <sup>3</sup>                       | 3012.2(3)                                                     |
| Z                                           | 2                                                             |
| ρ <sub>calc</sub> /g/cm <sup>3</sup>        | 0.604                                                         |
| μ/mm <sup>-1</sup>                          | 0.116                                                         |
| F(000)                                      | 572.0                                                         |
| Crystal size/mm <sup>3</sup>                | 0.12 × 0.11 × 0.1                                             |
| Radiation                                   | MoKα (λ = 0.71073)                                            |
| 2θ range for data collection/°              | 5.048 to 55.032                                               |
| Index ranges                                | -14 ≤ h ≤ 13, -15 ≤ k ≤ 15, -29 ≤ l ≤ 29                      |
| Reflections collected                       | 32115                                                         |
| Independent reflections                     | 6859 [R <sub>int</sub> = 0.0445, R <sub>sigma</sub> = 0.0333] |
| Data/restraints/parameters                  | 6859/428/438                                                  |
| Goodness-of-fit on F <sup>2</sup>           | 1.024                                                         |
| Final R indexes [I ≥ 2σ (I)]                | R <sub>1</sub> = 0.0499, wR <sub>2</sub> = 0.1356             |
| Final R indexes [all data]                  | R <sub>1</sub> = 0.0827, wR <sub>2</sub> = 0.1574             |
| Largest diff. peak/hole / e Å <sup>-3</sup> | 0.37/-0.18                                                    |



**Crystal data and structure refinement for 8.**

|                                             |                                                               |
|---------------------------------------------|---------------------------------------------------------------|
| CCDC number                                 | 2111092                                                       |
| Identification code                         | 8                                                             |
| Empirical formula                           | C <sub>30</sub> H <sub>27</sub> NO <sub>6</sub> S             |
| Formula weight                              | 529.58                                                        |
| Temperature/K                               | 273.15                                                        |
| Crystal system                              | triclinic                                                     |
| Space group                                 | P-1                                                           |
| a/Å                                         | 10.2538(6)                                                    |
| b/Å                                         | 11.2736(6)                                                    |
| c/Å                                         | 13.5192(7)                                                    |
| α/°                                         | 66.045(2)                                                     |
| β/°                                         | 76.756(2)                                                     |
| γ/°                                         | 69.057(2)                                                     |
| Volume/Å <sup>3</sup>                       | 1327.35(13)                                                   |
| Z                                           | 2                                                             |
| ρ <sub>calc</sub> /cm <sup>3</sup>          | 1.325                                                         |
| μ/mm <sup>-1</sup>                          | 0.167                                                         |
| F(000)                                      | 556.0                                                         |
| Crystal size/mm <sup>3</sup>                | 0.12 × 0.11 × 0.1                                             |
| Radiation                                   | MoKα (λ = 0.71073)                                            |
| 2θ range for data collection/°              | 4.99 to 54.974                                                |
| Index ranges                                | -13 ≤ h ≤ 13, -14 ≤ k ≤ 14, -16 ≤ l ≤ 17                      |
| Reflections collected                       | 27624                                                         |
| Independent reflections                     | 6021 [R <sub>int</sub> = 0.0265, R <sub>sigma</sub> = 0.0199] |
| Data/restraints/parameters                  | 6021/0/345                                                    |
| Goodness-of-fit on F <sup>2</sup>           | 1.027                                                         |
| Final R indexes [I ≥ 2σ (I)]                | R <sub>1</sub> = 0.0496, wR <sub>2</sub> = 0.1304             |
| Final R indexes [all data]                  | R <sub>1</sub> = 0.0602, wR <sub>2</sub> = 0.1398             |
| Largest diff. peak/hole / e Å <sup>-3</sup> | 0.28/-0.28                                                    |

## 6. Characterization of substrates and products

### ethyl 2,4-diphenyl-8-tosyl-7,8-dihydro-4H-furo[2,3-b]azepine-5-carboxylate (3a)

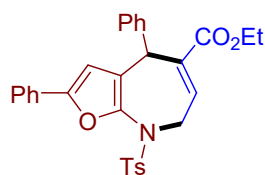

Isolated in 87% yield (89.3 mg) as white solid.

$^1\text{H}$  NMR (400 MHz,  $\text{CDCl}_3$ )  $\delta$  7.66 (d,  $J = 8.2$  Hz, 2H), 7.56 (d,  $J = 7.5$  Hz, 2H), 7.34 (t,  $J = 7.6$  Hz, 2H), 7.30 – 7.21 (m, 5H), 7.20 – 7.16 (m, 3H), 6.89 (t,  $J = 6.3$  Hz, 1H), 6.25 (s, 1H), 4.95 (s, 1H), 4.56 (dd,  $J = 16.8, 7.1$  Hz, 1H), 4.35 (dd,  $J = 16.8, 5.4$  Hz, 1H), 4.12 – 3.96 (m, 2H), 2.41 (s, 3H), 1.19 (t,  $J = 7.1$  Hz, 3H).  $^{13}\text{C}$  NMR (151 MHz,  $\text{CDCl}_3$ )  $\delta$  166.30, 150.06, 144.42, 142.66, 142.13, 136.21, 135.97, 134.34, 129.96, 129.72, 128.78, 128.75, 128.14, 128.06, 127.78, 127.10, 123.75, 115.98, 108.03, 61.30, 46.65, 41.53, 21.75, 14.21. HRMS (ESI) calcd. for  $\text{C}_{30}\text{H}_{28}\text{NO}_5\text{S}$  [ $\text{M}+\text{H}^+$ ]: 514.1683, found: 514.1681.

### ethyl 2-phenyl-4-(o-tolyl)-8-tosyl-7,8-dihydro-4H-furo[2,3-b]azepine-5-carboxylate (3b)

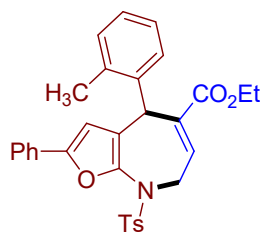

Isolated in 80% yield (84.3 mg) as white solid.

$^1\text{H}$  NMR (400 MHz,  $\text{CDCl}_3$ )  $\delta$  7.70 (d,  $J = 7.5$  Hz, 2H), 7.53 (d,  $J = 7.2$  Hz, 2H), 7.29 – 7.23 (m, 5H), 7.09 – 7.06 (m, 3H), 6.94 (d,  $J = 6.4$  Hz, 1H), 6.82 (s, 1H), 5.89 (s, 1H), 4.68 (s, 1H), 4.64 (d,  $J = 6.2$  Hz, 1H), 4.41 (d,  $J = 17.9$  Hz, 1H), 3.91 – 3.87 (m, 2H), 2.44 (s, 3H), 2.39 (s, 3H), 1.03 (t,  $J = 6.6$  Hz, 3H).  $^{13}\text{C}$  NMR (151 MHz,  $\text{CDCl}_3$ )  $\delta$  166.74, 150.88, 144.48, 141.69, 140.33, 135.92, 135.54, 135.03, 134.07, 130.68, 129.90, 129.73, 128.65, 128.24, 128.20, 127.84, 127.12, 126.71, 123.84, 119.07, 107.44, 60.96, 47.23, 38.78, 21.72, 19.79, 13.96. HRMS (ESI) calcd. for  $\text{C}_{31}\text{H}_{30}\text{NO}_5\text{S}$  [ $\text{M}+\text{H}^+$ ]: 528.1839, found: 528.1842.

### ethyl 2-phenyl-4-(m-tolyl)-8-tosyl-7,8-dihydro-4H-furo[2,3-b]azepine-5-carboxylate (3c)

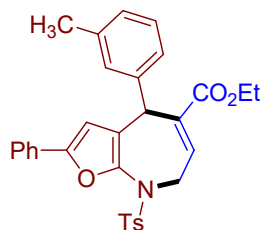

Isolated in 80% yield (84.3 mg) as yellow solid.

$^1\text{H}$  NMR (400 MHz,  $\text{CDCl}_3$ )  $\delta$  7.66 (d,  $J = 7.2$  Hz, 2H), 7.56 (d,  $J = 6.8$  Hz, 2H), 7.34 – 7.26 (m, 5H), 7.16 – 7.10 (m, 1H), 6.98 – 6.87 (m, 4H), 6.25 (s, 1H), 4.91 (s, 1H), 4.55 (dd,  $J = 16.6, 6.5$  Hz, 1H), 4.36 (dd,  $J = 16.5, 3.8$  Hz, 1H), 4.16 – 3.94 (m, 2H), 2.41 (s, 3H), 2.28 (s, 3H), 1.20 (t,  $J = 6.3$  Hz, 3H).  $^{13}\text{C}$

NMR (151 MHz, CDCl<sub>3</sub>)  $\delta$  166.30, 149.96, 144.39, 142.61, 142.00, 138.40, 136.26, 135.98, 134.18, 130.00, 129.69, 128.73, 128.60, 128.12, 127.88, 127.74, 125.17, 123.73, 116.06, 108.09, 61.26, 46.66, 41.45, 21.74, 21.59, 14.21. HRMS (ESI) calcd. for C<sub>31</sub>H<sub>30</sub>NO<sub>5</sub>S [M+H<sup>+</sup>]: 528.1839, found: 528.1843.

**ethyl 2-phenyl-4-(p-tolyl)-8-tosyl-7,8-dihydro-4H-furo[2,3-b]azepine-5-carboxylate (3d)**

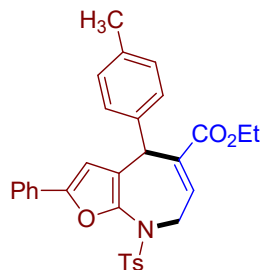

Isolated in 78% yield (82.2 mg) as yellow solid.

<sup>1</sup>H NMR (400 MHz, CDCl<sub>3</sub>)  $\delta$  7.65 (d, *J* = 7.8 Hz, 2H), 7.56 (d, *J* = 7.4 Hz, 2H), 7.35 – 7.31 (m, 2H), 7.25 – 7.21 (m, 3H), 7.05 (s, 4H), 6.86 (t, *J* = 5.8 Hz, 1H), 6.24 (s, 1H), 4.91 (s, 1H), 4.55 (dd, *J* = 16.5, 6.9 Hz, 1H), 4.35 (dd, *J* = 16.7, 5.0 Hz, 1H), 4.09 – 3.99 (m, 2H), 2.41 (s, 3H), 2.28 (s, 3H), 1.20 (t, *J* = 6.9 Hz, 3H). <sup>13</sup>C NMR (151 MHz, CDCl<sub>3</sub>)  $\delta$  166.32, 150.01, 144.38, 142.63, 139.16, 136.74, 136.43, 136.00, 134.04, 130.02, 129.69, 129.46, 128.73, 128.14, 127.92, 127.74, 123.75, 116.13, 108.07, 61.25, 46.66, 41.17, 21.74, 21.14, 14.23. HRMS (ESI) calcd. for C<sub>31</sub>H<sub>30</sub>NO<sub>5</sub>S [M+H<sup>+</sup>]: 528.1839, found: 528.1838.

**ethyl 4-(2-methoxyphenyl)-2-phenyl-8-tosyl-7,8-dihydro-4H-furo[2,3-b]azepine-5-carboxylate (3e)**

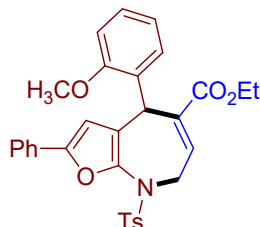

Isolated in 82% yield (89.1 mg) as yellow solid.

<sup>1</sup>H NMR (400 MHz, CDCl<sub>3</sub>)  $\delta$  7.67 (d, *J* = 8.3 Hz, 2H), 7.55 (d, *J* = 7.4 Hz, 2H), 7.33 (t, *J* = 7.7 Hz, 2H), 7.29 – 7.26 (m, 2H), 7.24 – 7.16 (m, 2H), 7.04 (dd, *J* = 7.8, 1.5 Hz, 1H), 6.89 – 6.78 (m, 3H), 6.27 (s, 1H), 5.19 (s, 1H), 4.51 (dd, *J* = 16.8, 6.7 Hz, 1H), 4.40 (dd, *J* = 16.9, 6.4 Hz, 1H), 3.98 (qq, *J* = 10.8, 7.1 Hz, 2H), 3.80 (s, 3H), 2.41 (s, 3H), 1.14 (t, *J* = 7.1 Hz, 3H). <sup>13</sup>C NMR (151 MHz, CDCl<sub>3</sub>)  $\delta$  166.55, 156.65, 149.90, 144.27, 142.23, 136.20, 135.55, 134.33, 130.21, 130.14, 129.72, 129.18, 128.69, 128.42, 128.13, 127.60, 123.72, 120.84, 116.83, 111.15, 108.00, 60.94, 55.57, 46.58, 36.49, 21.73, 14.16. HRMS (ESI) calcd. for C<sub>31</sub>H<sub>30</sub>NO<sub>6</sub>S [M+H<sup>+</sup>]: 544.1788, found: 544.1792.

**ethyl 4-(4-methoxyphenyl)-2-phenyl-8-tosyl-7,8-dihydro-4H-furo[2,3-b]azepine-5-carboxylate (3f)**

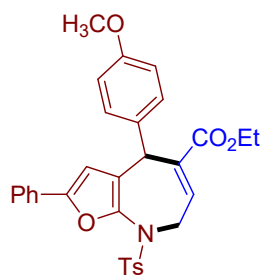

Isolated in 87% yield (94.5 mg) as white solid.

$^1\text{H}$  NMR (400 MHz,  $\text{CDCl}_3$ )  $\delta$  7.65 (d,  $J = 7.4$  Hz, 2H), 7.56 (d,  $J = 7.1$  Hz, 2H), 7.32 – 7.25 (m, 5H), 7.09 (d,  $J = 7.7$  Hz, 2H), 6.83 (t,  $J = 6.0$  Hz, 1H), 6.78 (d,  $J = 7.7$  Hz, 2H), 6.24 (s, 1H), 4.88 (s, 1H), 4.55 (dd,  $J = 16.4, 6.7$  Hz, 1H), 4.34 (dd,  $J = 16.8, 4.3$  Hz, 1H), 4.15 – 3.93 (m, 2H), 3.74 (s, 3H), 2.41 (s, 3H), 1.20 (t,  $J = 6.5$  Hz, 3H).  $^{13}\text{C}$  NMR (151 MHz,  $\text{CDCl}_3$ )  $\delta$  166.35, 158.59, 150.05, 144.39, 142.53, 136.40, 135.99, 134.25, 133.77, 130.00, 129.70, 129.12, 128.73, 128.13, 127.75, 123.74, 116.47, 114.10, 108.04, 61.23, 55.32, 46.68, 40.83, 21.72, 14.23. HRMS (ESI) calcd. for  $\text{C}_{31}\text{H}_{30}\text{NO}_6\text{S}$  [ $\text{M}+\text{H}^+$ ]: 544.1788, found: 544.1788.

ethyl 4-(4-isopropylphenyl)-2-phenyl-8-tosyl-7,8-dihydro-4H-furo[2,3-b]azepine-5-carboxylate (3g)

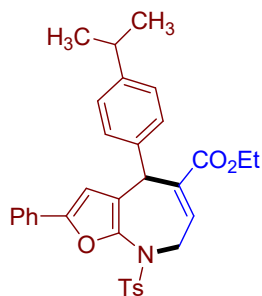

Isolated in 79% yield (87.7 mg) as yellow solid.

$^1\text{H}$  NMR (400 MHz,  $\text{CDCl}_3$ )  $\delta$  7.65 (d,  $J = 8.2$  Hz, 2H), 7.56 (d,  $J = 7.5$  Hz, 2H), 7.33 (t,  $J = 7.7$  Hz, 2H), 7.25 – 7.21 (m, 3H), 7.09 (s, 4H), 6.86 (t,  $J = 6.4$  Hz, 1H), 6.27 (s, 1H), 4.95 (s, 1H), 4.55 (dd,  $J = 16.7, 7.2$  Hz, 1H), 4.34 (dd,  $J = 16.7, 5.7$  Hz, 1H), 4.13 – 3.97 (m, 2H), 2.83 (dt,  $J = 13.8, 6.9$  Hz, 1H), 2.40 (s, 3H), 1.21 – 1.18 (m, 9H).  $^{13}\text{C}$  NMR (151 MHz,  $\text{CDCl}_3$ )  $\delta$  166.32, 149.86, 147.58, 144.36, 142.72, 139.35, 136.62, 135.94, 133.96, 130.01, 129.66, 128.72, 128.12, 127.85, 127.70, 126.78, 123.71, 115.73, 108.16, 61.24, 46.57, 40.96, 33.71, 24.02, 24.01, 21.71, 14.19. HRMS (ESI) calcd. for  $\text{C}_{33}\text{H}_{33}\text{NNaO}_5\text{S}$  [ $\text{M}+\text{Na}^+$ ]: 578.1972, found: 578.1966.

ethyl 4-(2-chlorophenyl)-2-phenyl-8-tosyl-7,8-dihydro-4H-furo[2,3-b]azepine-5-carboxylate (3h)

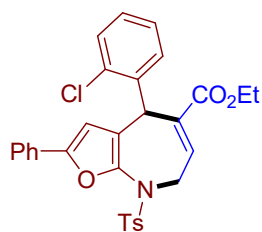

Isolated in 67% yield (73.3 mg) as yellow solid.

$^1\text{H}$  NMR (400 MHz,  $\text{CDCl}_3$ )  $\delta$  7.75 (d,  $J = 7.8$  Hz, 2H), 7.53 (d,  $J = 7.4$  Hz, 2H), 7.38 – 7.32 (m, 5H), 7.27 – 7.20 (m, 1H), 7.16 (s, 3H), 7.01 (t,  $J = 4.3$  Hz, 1H), 6.28 (s, 1H), 5.26 (s, 1H), 4.51 (s, 2H), 4.05 – 3.83 (m, 2H), 2.44 (s, 3H), 1.07 (t,  $J = 7.0$  Hz, 3H).  $^{13}\text{C}$  NMR (151 MHz,  $\text{CDCl}_3$ )  $\delta$  166.33, 150.70, 144.53, 141.70, 139.78, 136.14, 136.07, 133.66, 133.38, 129.96, 129.84, 129.79, 129.42, 128.69, 128.45, 128.11, 127.84, 127.61, 123.81, 118.17, 107.48, 61.24, 47.26, 38.93, 21.75, 13.97. HRMS (ESI) calcd. for  $\text{C}_{30}\text{H}_{27}\text{ClNO}_5\text{S}$  [ $\text{M}+\text{H}^+$ ]: 548.1293, found: 548.1292.

**ethyl 4-(4-chlorophenyl)-2-phenyl-8-tosyl-7,8-dihydro-4H-furo[2,3-b]azepine-5-carboxylate (3i)**

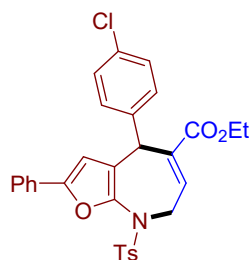

Isolated in 71% yield (77.7 mg) as yellow solid.

$^1\text{H}$  NMR (400 MHz,  $\text{CDCl}_3$ )  $\delta$  7.68 (d,  $J = 8.1$  Hz, 2H), 7.55 (d,  $J = 7.6$  Hz, 2H), 7.34 (t,  $J = 7.6$  Hz, 2H), 7.28 – 7.21 (m, 5H), 7.13 (d,  $J = 8.3$  Hz, 2H), 6.92 (t,  $J = 6.0$  Hz, 1H), 6.24 (s, 1H), 4.93 (s, 1H), 4.52 (dd,  $J = 17.1, 6.6$  Hz, 1H), 4.35 (dd,  $J = 17.1, 5.3$  Hz, 1H), 4.16 – 3.94 (m, 2H), 2.42 (s, 3H), 1.21 (t,  $J = 7.1$  Hz, 3H).  $^{13}\text{C}$  NMR (151 MHz,  $\text{CDCl}_3$ )  $\delta$  166.19, 150.29, 144.50, 142.65, 140.71, 136.07, 135.46, 134.90, 132.92, 129.86, 129.76, 129.45, 128.92, 128.79, 128.09, 127.91, 123.76, 115.98, 107.73, 61.42, 46.67, 41.03, 21.75, 14.23. HRMS (ESI) calcd. for  $\text{C}_{30}\text{H}_{27}\text{ClNO}_5\text{S}$  [ $\text{M}+\text{H}^+$ ]: 548.1293, found: 548.1243.

**ethyl 2-phenyl-8-tosyl-4-(4-(trifluoromethyl)phenyl)-7,8-dihydro-4H-furo[2,3-b]azepine-5-carboxylate (3j)**

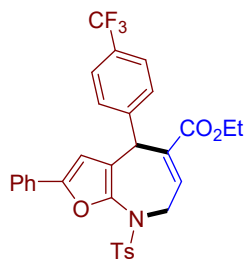

Isolated in 71% yield (82.5 mg) as yellow solid.

$^1\text{H}$  NMR (400 MHz,  $\text{CDCl}_3$ )  $\delta$  7.70 (d,  $J = 8.3$  Hz, 2H), 7.58 – 7.47 (m, 4H), 7.38 – 7.31 (m, 4H), 7.30 – 7.22 (m, 3H), 6.99 (t,  $J = 6.0$  Hz, 1H), 6.26 (s, 1H), 5.05 (s, 1H), 4.52 (dd,  $J = 17.1, 6.5$  Hz, 1H), 4.38 (dd,  $J = 18.0, 5.6$  Hz, 1H), 4.14 – 3.98 (m, 2H), 2.42 (s, 3H), 1.21 (t,  $J = 7.1$  Hz, 3H).  $^{13}\text{C}$  NMR (151 MHz,  $\text{CDCl}_3$ )  $\delta$  166.11, 150.39, 146.18, 144.56, 142.75, 136.12, 135.55, 134.97, 129.80, 129.34 (q,  $J = 32.5$  Hz), 128.80, 128.43, 128.07, 127.97, 125.76 (q,  $J = 3.6$  Hz), 124.18 (q,  $J = 272.2$  Hz), 123.76, 115.65, 107.59, 61.51, 46.67, 41.43, 21.73, 14.19. HRMS (ESI) calcd. for  $\text{C}_{31}\text{H}_{27}\text{F}_3\text{NO}_5\text{S}$  [ $\text{M}+\text{H}^+$ ]: 582.1557, found: 582.1532.

**ethyl 4-(4-nitrophenyl)-2-phenyl-8-tosyl-7,8-dihydro-4H-furo[2,3-b]azepine-5-carboxylate (3k)**

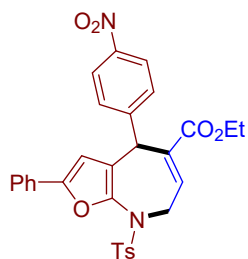

Isolated in 61% yield (68.1 mg) as yellow solid.

$^1\text{H}$  NMR (400 MHz,  $\text{CDCl}_3$ )  $\delta$  8.13 (d,  $J = 8.8$  Hz, 2H), 7.74 (d,  $J = 8.3$  Hz, 2H), 7.56 – 7.50 (m, 2H), 7.43 (d,  $J = 8.8$  Hz, 2H), 7.38 – 7.29 (m, 4H), 7.28 – 7.23 (m, 1H), 7.07 (t,  $J = 5.7$  Hz, 1H), 6.30 (s, 1H), 5.12 (s, 1H), 4.51 – 4.38 (m, 2H), 4.17 – 4.00 (m, 2H), 2.44 (s, 3H), 1.22 (t,  $J = 7.1$  Hz, 3H).  $^{13}\text{C}$  NMR (151 MHz,  $\text{CDCl}_3$ )  $\delta$  166.04, 150.63, 149.54, 146.98, 144.66, 142.72, 136.51, 136.25, 133.95, 129.86, 129.69, 128.94, 128.84, 128.09, 128.00, 124.07, 123.76, 115.79, 107.28, 61.67, 46.76, 41.46, 21.76, 14.22. HRMS (ESI) calcd. for  $\text{C}_{30}\text{H}_{27}\text{N}_2\text{O}_7\text{S}$  [ $\text{M}+\text{H}^+$ ]: 559.1533, found: 559.1504.

**ethyl 4-(naphthalen-1-yl)-2-phenyl-8-tosyl-7,8-dihydro-4H-furo[2,3-b]azepine-5-carboxylate (3l)**

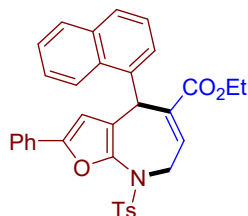

Isolated in 82% yield (92.4 mg) as white solid.

$^1\text{H}$  NMR (400 MHz,  $\text{CDCl}_3$ )  $\delta$  8.13 (d,  $J = 8.5$  Hz, 1H), 7.86 (d,  $J = 8.1$  Hz, 1H), 7.77 – 7.70 (m, 3H), 7.59 (t,  $J = 7.4$  Hz, 1H), 7.50 (t,  $J = 7.4$  Hz, 1H), 7.42 (d,  $J = 7.5$  Hz, 2H), 7.37 – 7.33 (m, 3H), 7.29 – 7.15 (m, 4H), 6.95 (t,  $J = 6.0$  Hz, 1H), 5.91 (s, 1H), 5.44 (s, 1H), 4.69 (dd,  $J = 17.9, 6.0$  Hz, 1H), 4.54 (dd,  $J = 17.9, 2.1$  Hz, 1H), 3.88 – 3.63 (m, 2H), 2.45 (s, 3H), 0.74 (t,  $J = 7.1$  Hz, 3H).  $^{13}\text{C}$  NMR (151 MHz,  $\text{CDCl}_3$ )  $\delta$  166.71, 150.68, 144.55, 141.63, 138.41, 136.15, 135.44, 134.57, 134.14, 131.40, 129.87, 129.82, 129.12, 128.61, 128.30, 127.90, 127.80, 126.54, 126.15, 125.81, 125.78, 123.81, 123.41, 119.20, 107.63, 60.98, 47.25, 37.50, 21.78, 13.70. HRMS (ESI) calcd. for  $\text{C}_{34}\text{H}_{30}\text{NO}_5\text{S}$  [ $\text{M}+\text{H}^+$ ]: 564.1839, found: 564.1836.

**ethyl 2-phenyl-4-(thiophen-2-yl)-8-tosyl-7,8-dihydro-4H-furo[2,3-b]azepine-5-carboxylate (3m)**

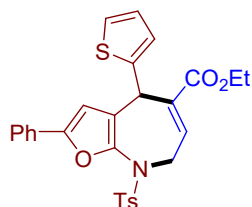

Isolated in 76% yield (78.9 mg) as yellow solid.

$^1\text{H}$  NMR (400 MHz,  $\text{CDCl}_3$ )  $\delta$  7.64 (d,  $J = 8.1$  Hz, 2H), 7.59 (d,  $J = 7.6$  Hz, 2H), 7.36 (t,  $J = 7.6$  Hz, 2H), 7.27 – 7.23 (m, 3H), 7.12 (d,  $J = 5.0$  Hz, 1H), 6.92 (t,  $J = 6.6$  Hz, 1H), 6.88 – 6.77 (m, 2H), 6.46 (s, 1H), 5.33 (s, 1H), 4.54 (dd,  $J = 16.4, 7.2$  Hz, 1H), 4.36 (dd,  $J = 16.3, 6.0$  Hz, 1H), 4.14 (q,  $J = 7.1$  Hz, 2H),

2.40 (s, 3H), 1.27 (t,  $J = 7.0$  Hz, 3H).  $^{13}\text{C}$  NMR (151 MHz,  $\text{CDCl}_3$ )  $\delta$  165.80, 149.72, 145.53, 144.42, 142.89, 136.41, 135.93, 134.75, 129.92, 129.66, 128.78, 128.07, 127.79, 126.72, 125.23, 124.66, 123.71, 114.42, 107.90, 61.51, 46.20, 36.19, 21.71, 14.29. HRMS (ESI) calcd. for  $\text{C}_{28}\text{H}_{26}\text{NO}_5\text{S}_2$   $[\text{M}+\text{H}^+]$ : 520.1247, found: 520.1245.

**ethyl (E)-2-phenyl-4-styryl-8-tosyl-7,8-dihydro-4H-furo[2,3-b]azepine-5-carboxylate (3n)**

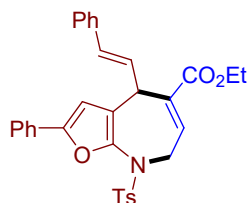

Isolated in 77% yield (83.0 mg) as yellow solid.

$^1\text{H}$  NMR (400 MHz,  $\text{CDCl}_3$ )  $\delta$  7.68 (d,  $J = 8.1$  Hz, 2H), 7.60 (d,  $J = 7.5$  Hz, 2H), 7.36 (t,  $J = 7.6$  Hz, 2H), 7.32 – 7.22 (m, 7H), 7.21 – 7.15 (m, 1H), 6.92 (t,  $J = 6.0$  Hz, 1H), 6.51 (s, 1H), 6.41 (d,  $J = 15.7$  Hz, 1H), 6.10 (dd,  $J = 15.6, 7.2$  Hz, 1H), 4.61 (d,  $J = 6.9$  Hz, 1H), 4.45 (dd,  $J = 16.9, 6.2$  Hz, 1H), 4.36 (dd,  $J = 17.0, 6.1$  Hz, 1H), 4.22 – 4.10 (m, 2H), 2.39 (s, 3H), 1.30 (t,  $J = 7.0$  Hz, 3H).  $^{13}\text{C}$  NMR (151 MHz,  $\text{CDCl}_3$ )  $\delta$  166.09, 149.90, 144.35, 142.89, 136.81, 136.16, 135.11, 134.80, 130.89, 130.07, 129.68, 129.04, 128.80, 128.62, 128.09, 127.75, 127.67, 126.54, 123.70, 114.99, 107.85, 61.39, 46.52, 38.77, 21.72, 14.37. HRMS (ESI) calcd. for  $\text{C}_{32}\text{H}_{30}\text{NO}_5\text{S}$   $[\text{M}+\text{H}^+]$ : 540.1839, found: 540.1832.

**ethyl 4-phenyl-2-(p-tolyl)-8-tosyl-7,8-dihydro-4H-furo[2,3-b]azepine-5-carboxylate (3o)**

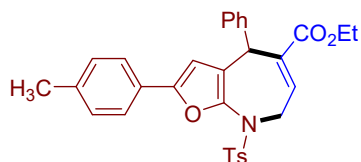

Isolated in 81% yield (85.4 mg) as yellow solid.

$^1\text{H}$  NMR (400 MHz,  $\text{CDCl}_3$ )  $\delta$  7.65 (d,  $J = 8.1$  Hz, 2H), 7.45 (d,  $J = 8.0$  Hz, 2H), 7.26 – 7.21 (m, 4H), 7.21 – 7.10 (m, 5H), 6.88 (t,  $J = 6.2$  Hz, 1H), 6.18 (s, 1H), 4.93 (s, 1H), 4.55 (dd,  $J = 16.9, 7.1$  Hz, 1H), 4.34 (dd,  $J = 16.9, 5.4$  Hz, 1H), 4.13 – 3.93 (m, 2H), 2.41 (s, 3H), 2.34 (s, 3H), 1.19 (t,  $J = 7.1$  Hz, 3H).  $^{13}\text{C}$  NMR (151 MHz,  $\text{CDCl}_3$ )  $\delta$  166.31, 150.31, 144.36, 142.28, 142.18, 137.68, 136.23, 136.02, 134.33, 129.68, 129.42, 128.74, 128.15, 128.07, 127.31, 127.05, 123.73, 115.95, 107.28, 61.26, 46.68, 41.58, 21.73, 21.41, 14.20. HRMS (ESI) calcd. for  $\text{C}_{31}\text{H}_{30}\text{NO}_5\text{S}$   $[\text{M}+\text{H}^+]$ : 528.1839, found: 528.1857.

**ethyl 2-(4-methoxyphenyl)-4-phenyl-8-tosyl-7,8-dihydro-4H-furo[2,3-b]azepine-5-carboxylate (3p)**

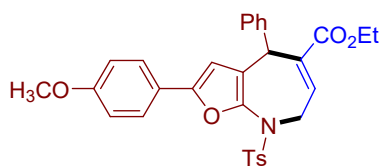

Isolated in 80% yield (86.9 mg) as yellow solid.

$^1\text{H}$  NMR (400 MHz,  $\text{CDCl}_3$ )  $\delta$  7.65 (d,  $J = 7.5$  Hz, 2H), 7.49 (d,  $J = 7.9$  Hz, 2H), 7.29 – 7.14 (m, 7H), 6.87 (d,  $J = 7.4$  Hz, 3H), 6.09 (s, 1H), 4.91 (s, 1H), 4.55 (dd,  $J = 16.7, 6.7$  Hz, 1H), 4.35 (dd,  $J = 16.7,$

4.5 Hz, 1H), 4.14 – 3.93 (m, 2H), 3.81 (s, 3H), 2.41 (s, 3H), 1.18 (t,  $J = 6.7$  Hz, 3H).  $^{13}\text{C}$  NMR (151 MHz,  $\text{CDCl}_3$ )  $\delta$  166.31, 159.41, 150.23, 144.35, 142.21, 141.99, 136.17, 135.99, 134.31, 129.69, 128.74, 128.16, 128.10, 127.06, 125.28, 123.06, 116.11, 114.20, 106.40, 61.24, 55.46, 46.74, 41.66, 21.74, 14.20. HRMS (ESI) calcd. for  $\text{C}_{31}\text{H}_{30}\text{NO}_6\text{S}$  [ $\text{M}+\text{H}^+$ ]: 544.1788, found: 544.1784.

**ethyl 2-(4-fluorophenyl)-4-phenyl-8-tosyl-7,8-dihydro-4H-furo[2,3-b]azepine-5-carboxylate (3q)**

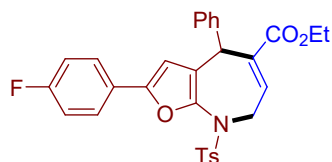

Isolated in 77% yield (81.8 mg) as yellow solid.

$^1\text{H}$  NMR (400 MHz,  $\text{CDCl}_3$ )  $\delta$  7.65 (d,  $J = 8.2$  Hz, 2H), 7.58 – 7.47 (m, 2H), 7.28 – 7.14 (m, 7H), 7.03 (t,  $J = 8.7$  Hz, 2H), 6.86 (dd,  $J = 6.9, 5.5$  Hz, 1H), 6.17 (s, 1H), 4.93 (s, 1H), 4.56 (dd,  $J = 16.9, 7.1$  Hz, 1H), 4.35 (dd,  $J = 16.8, 5.0$  Hz, 1H), 4.13 – 3.92 (m, 2H), 2.41 (s, 3H), 1.18 (t,  $J = 7.1$  Hz, 3H).  $^{13}\text{C}$  NMR (151 MHz,  $\text{CDCl}_3$ )  $\delta$  166.23, 162.40 (d,  $J = 247.6$  Hz), 149.29, 144.47, 142.62, 142.07, 136.08, 135.94, 134.25, 129.74, 128.79, 128.11, 128.07, 127.13, 126.37 (d,  $J = 3.1$  Hz), 125.58 (d,  $J = 8.0$  Hz), 116.22, 115.80 (d,  $J = 22.0$  Hz), 107.67, 61.27, 46.67, 41.63, 21.72, 14.18. HRMS (ESI) calcd. for  $\text{C}_{30}\text{H}_{27}\text{FNO}_5\text{S}$  [ $\text{M}+\text{H}^+$ ]: 532.1588, found: 532.1585.

**ethyl 4-phenyl-8-tosyl-2-(4-(trifluoromethyl)phenyl)-7,8-dihydro-4H-furo[2,3-b]azepine-5-carboxylate (3r)**

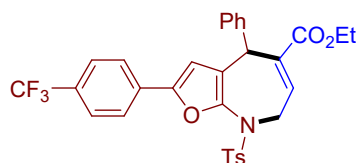

Isolated in 70% yield (81.4 mg) as yellow solid.

$^1\text{H}$  NMR (400 MHz,  $\text{CDCl}_3$ )  $\delta$  7.70 – 7.61 (m, 4H), 7.58 (d,  $J = 8.5$  Hz, 2H), 7.30 – 7.23 (m, 4H), 7.23 – 7.15 (m, 3H), 6.89 (dd,  $J = 7.0, 5.6$  Hz, 1H), 6.38 (s, 1H), 4.98 (s, 1H), 4.56 (dd,  $J = 16.9, 7.1$  Hz, 1H), 4.36 (dd,  $J = 16.8, 5.6$  Hz, 1H), 4.13 – 3.97 (m, 2H), 2.42 (s, 3H), 1.20 (t,  $J = 7.1$  Hz, 3H).  $^{13}\text{C}$  NMR (151 MHz,  $\text{CDCl}_3$ )  $\delta$  166.19, 148.48, 144.62, 143.71, 141.92, 136.16, 135.96, 134.25, 133.09, 129.81, 129.32 (q,  $J = 32.5$  Hz), 128.86, 128.08, 128.02, 127.23, 125.79 (q,  $J = 3.6$  Hz), 124.20 (q,  $J = 272.0$  Hz), 123.74, 116.17, 110.06, 61.36, 46.54, 41.47, 21.74, 14.19. HRMS (ESI) calcd. for  $\text{C}_{31}\text{H}_{27}\text{F}_3\text{NO}_5\text{S}$  [ $\text{M}+\text{H}^+$ ]: 582.1557, found: 582.1535.

**ethyl 4-phenyl-2-propyl-8-tosyl-7,8-dihydro-4H-furo[2,3-b]azepine-5-carboxylate (3s)**

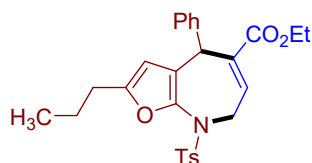

Isolated in 58% yield (55.6 mg) as yellow solid.



$^1\text{H}$  NMR (600 MHz,  $\text{CDCl}_3$ )  $\delta$  7.58 (d,  $J = 8.3$  Hz, 2H), 7.25 – 7.19 (m, 4H), 7.18 – 7.14 (m, 1H), 7.11 (d,  $J = 7.2$  Hz, 2H), 6.80 (dd,  $J = 7.1, 5.3$  Hz, 1H), 5.56 (s, 1H), 4.78 (s, 1H), 4.51 (dd,  $J = 16.9, 7.2$  Hz, 1H), 4.29 (dd,  $J = 17.7, 5.2$  Hz, 1H), 3.99 (qq,  $J = 10.8, 7.1$  Hz, 2H), 2.55 – 2.44 (m, 2H), 2.40 (s, 3H), 1.65 – 1.57 (m, 2H), 1.16 (t,  $J = 7.1$  Hz, 3H), 0.93 (t,  $J = 7.4$  Hz, 3H).  $^{13}\text{C}$  NMR (151 MHz,  $\text{CDCl}_3$ )  $\delta$  166.31, 153.14, 144.21, 142.37, 141.12, 136.09, 135.79, 134.23, 129.59, 128.63, 128.14, 128.07, 126.92, 114.86, 108.30, 61.13, 46.85, 41.75, 30.06, 21.70, 21.21, 14.16, 13.78. HRMS (ESI) calcd. for  $\text{C}_{27}\text{H}_{30}\text{NO}_5\text{S}$  [ $\text{M}+\text{H}^+$ ]: 480.1839, found: 480.1836.

**ethyl 2,4-diphenyl-8-(phenylsulfonyl)-7,8-dihydro-4H-furo[2,3-b]azepine-5-carboxylate (3t)**

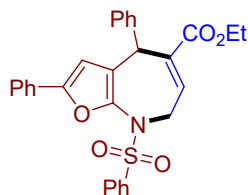

Isolated in 77% yield (76.9 mg) as yellow solid.

$^1\text{H}$  NMR (400 MHz,  $\text{CDCl}_3$ )  $\delta$  7.79 (d,  $J = 7.6$  Hz, 2H), 7.64 – 7.52 (m, 3H), 7.47 (t,  $J = 7.6$  Hz, 2H), 7.33 (t,  $J = 7.6$  Hz, 2H), 7.28 – 7.14 (m, 6H), 6.89 (t,  $J = 6.2$  Hz, 1H), 6.25 (s, 1H), 4.95 (s, 1H), 4.56 (dd,  $J = 16.8, 7.0$  Hz, 1H), 4.37 (dd,  $J = 16.8, 5.4$  Hz, 1H), 4.14 – 3.89 (m, 2H), 1.19 (t,  $J = 7.1$  Hz, 3H).  $^{13}\text{C}$  NMR (151 MHz,  $\text{CDCl}_3$ )  $\delta$  166.27, 150.09, 142.51, 142.04, 139.05, 136.29, 134.14, 133.37, 129.92, 129.12, 128.76, 128.74, 128.05, 128.03, 127.79, 127.10, 123.72, 116.07, 108.02, 61.27, 46.70, 41.49, 14.19. HRMS (ESI) calcd. for  $\text{C}_{29}\text{H}_{26}\text{NO}_5\text{S}$  [ $\text{M}+\text{H}^+$ ]: 500.1526, found: 500.1536.

**ethyl 8-((4-bromophenyl)sulfonyl)-2,4-diphenyl-7,8-dihydro-4H-furo[2,3-b]azepine-5-carboxylate (3u)**

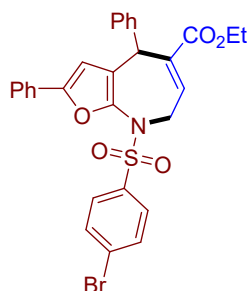

Isolated in 65% yield (75.0 mg) as yellow solid.

$^1\text{H}$  NMR (400 MHz,  $\text{CDCl}_3$ )  $\delta$  7.62 (s, 4H), 7.58 – 7.52 (m, 2H), 7.35 (t,  $J = 7.6$  Hz, 2H), 7.28 – 7.23 (m, 3H), 7.22 – 7.14 (m, 3H), 6.86 (dd,  $J = 7.0, 5.7$  Hz, 1H), 6.26 (s, 1H), 4.97 (s, 1H), 4.56 (dd,  $J = 16.9, 7.1$  Hz, 1H), 4.38 (dd,  $J = 16.6, 5.2$  Hz, 1H), 4.16 – 4.01 (m, 2H), 1.21 (t,  $J = 7.1$  Hz, 3H).  $^{13}\text{C}$  NMR (151 MHz,  $\text{CDCl}_3$ )  $\delta$  166.20, 150.38, 142.20, 141.89, 138.00, 136.49, 134.01, 132.44, 129.81, 129.58, 128.84, 128.82, 128.04, 127.97, 127.21, 123.79, 116.38, 108.04, 61.64, 46.81, 41.55, 14.24. HRMS (ESI) calcd. for  $\text{C}_{29}\text{H}_{25}\text{BrNO}_5\text{S}$  [ $\text{M}+\text{H}^+$ ]: 578.0631, found: 578.0625.

**methyl 2,4-diphenyl-8-tosyl-7,8-dihydro-4H-furo[2,3-b]azepine-5-carboxylate (3v)**

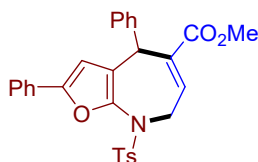

Isolated in 77% yield (76.9 mg) as white solid.

$^1\text{H}$  NMR (400 MHz,  $\text{CDCl}_3$ )  $\delta$  7.65 (d,  $J = 8.1$  Hz, 2H), 7.56 (d,  $J = 7.6$  Hz, 2H), 7.34 (t,  $J = 7.5$  Hz, 2H), 7.29 – 7.14 (m, 8H), 6.88 (t,  $J = 6.2$  Hz, 1H), 6.26 (s, 1H), 4.97 (s, 1H), 4.54 (dd,  $J = 16.7, 7.0$  Hz, 1H), 4.35 (dd,  $J = 16.8, 5.4$  Hz, 1H), 3.62 (s, 3H), 2.42 (s, 3H).  $^{13}\text{C}$  NMR (151 MHz,  $\text{CDCl}_3$ )  $\delta$  166.73, 150.06, 144.49, 142.73, 142.06, 135.98, 135.93, 134.72, 129.94, 129.70, 128.81, 128.75, 128.14, 128.00, 127.79, 127.14, 123.74, 115.83, 108.00, 52.31, 46.64, 41.48, 21.76. HRMS (ESI) calcd. for  $\text{C}_{29}\text{H}_{26}\text{NO}_5\text{S}$  [ $\text{M}+\text{H}^+$ ]: 500.1526, found: 500.1526.

#### benzyl 2,4-diphenyl-8-tosyl-7,8-dihydro-4H-furo[2,3-b]azepine-5-carboxylate (3w)

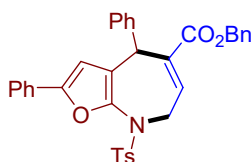

Isolated in 80% yield (92.0 mg) as yellow solid.

$^1\text{H}$  NMR (400 MHz,  $\text{CDCl}_3$ )  $\delta$  7.61 (d,  $J = 8.3$  Hz, 2H), 7.55 (d,  $J = 7.4$  Hz, 2H), 7.41 – 7.29 (m, 5H), 7.26 – 7.18 (m, 6H), 7.18 – 7.10 (m, 4H), 6.94 (dd,  $J = 6.8, 5.6$  Hz, 1H), 6.23 (s, 1H), 5.02 (q,  $J = 12.4$  Hz, 2H), 4.92 (s, 1H), 4.56 (dd,  $J = 17.0, 7.0$  Hz, 1H), 4.36 (dd,  $J = 16.9, 5.4$  Hz, 1H), 2.33 (s, 3H).  $^{13}\text{C}$  NMR (151 MHz,  $\text{CDCl}_3$ )  $\delta$  166.13, 150.11, 144.49, 142.57, 141.95, 135.95, 135.80, 135.65, 134.81, 129.95, 129.68, 128.82, 128.75, 128.74, 128.50, 128.21, 128.09, 127.80, 127.15, 123.75, 116.14, 107.98, 67.07, 46.73, 41.71, 21.71. HRMS (ESI) calcd. for  $\text{C}_{35}\text{H}_{30}\text{NO}_5\text{S}$  [ $\text{M}+\text{H}^+$ ]: 576.1839, found: 576.1812.

#### cyclohexylmethyl 2,4-diphenyl-8-tosyl-7,8-dihydro-4H-furo[2,3-b]azepine-5-carboxylate (3x)

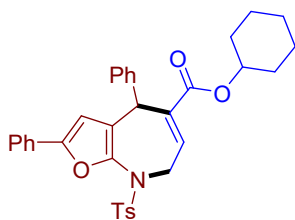

Isolated in 80% yield (90.8 mg) as white solid.

$^1\text{H}$  NMR (400 MHz,  $\text{CDCl}_3$ )  $\delta$  7.66 (d,  $J = 8.3$  Hz, 2H), 7.59 – 7.53 (m, 2H), 7.34 (t,  $J = 7.6$  Hz, 2H), 7.27 – 7.21 (m, 5H), 7.20 – 7.14 (m, 3H), 6.89 (dd,  $J = 6.9, 5.5$  Hz, 1H), 6.24 (s, 1H), 4.92 (s, 1H), 4.69 – 4.60 (m, 1H), 4.57 (dd,  $J = 17.0, 7.1$  Hz, 1H), 4.36 (dd,  $J = 16.9, 5.5$  Hz, 1H), 2.41 (s, 3H), 1.78 – 1.60 (m, 4H), 1.56 – 1.47 (m, 1H), 1.39 – 1.22 (m, 5H).  $^{13}\text{C}$  NMR (151 MHz,  $\text{CDCl}_3$ )  $\delta$  165.76, 150.04, 144.36, 142.56, 142.20, 136.61, 136.04, 133.99, 130.01, 129.76, 128.75, 128.10, 128.07, 127.77, 127.06, 123.75, 116.16, 108.08, 73.75, 46.66, 41.63, 31.63, 31.43, 25.44, 23.76, 21.76. HRMS (ESI) calcd. for  $\text{C}_{34}\text{H}_{34}\text{NO}_5\text{S}$  [ $\text{M}+\text{H}^+$ ]: 568.2152, found: 568.2124.

#### Ethyl-6-methyl-2,4-diphenyl-8-tosyl-7,8-dihydro-4H-furo[2,3-b]azepine-5-carboxylate (3y)

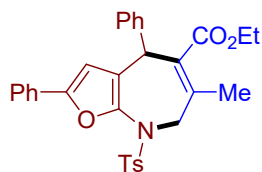

Isolated in 43% yield (45.3 mg) as yellow solid.

$^1\text{H NMR}$  (400 MHz,  $\text{CDCl}_3$ )  $\delta$  7.75 (d,  $J = 8.3$  Hz, 2H), 7.50 (d,  $J = 7.5$  Hz, 2H), 7.35–7.30 (m, 4H), 7.25 – 7.16 (m, 4H), 7.10 (d,  $J = 7.0$  Hz, 2H), 6.24 (s, 1H), 4.83 (s, 1H), 4.28 (q,  $J = 15.8$  Hz, 2H), 4.12 – 3.98 (m, 2H), 2.46 (s, 3H), 2.11 (s, 3H), 1.16 (t,  $J = 7.1$  Hz, 3H);  $^{13}\text{C NMR}$  (101 MHz,  $\text{CDCl}_3$ )  $\delta$  168.79, 149.12, 144.38, 143.23, 142.33, 138.81, 136.41, 133.46, 130.07, 129.75, 128.76, 128.61, 128.01, 127.86, 127.53, 126.97, 123.49, 113.53, 108.35, 60.91, 52.85, 42.86, 23.43, 21.81, 14.21. HRMS (ESI) calcd. for  $\text{C}_{31}\text{H}_{30}\text{NO}_5\text{S}$  [ $\text{M}+\text{H}^+$ ]: 528.1839, found: 528.1821.

**(E)-3-benzylidene-5-phenyl-1-tosyl-1,3-dihydro-2H-pyrrol-2-one (4a)**

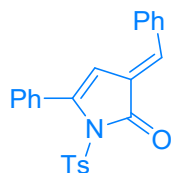

$^1\text{H NMR}$  (400 MHz,  $\text{CDCl}_3$ )  $\delta$  7.81 (d,  $J = 8.4$  Hz, 2H), 7.58 – 7.49 (m, 4H), 7.48 – 7.42 (m, 3H), 7.41 – 7.34 (m, 4H), 7.30 (d,  $J = 8.1$  Hz, 2H), 6.37 (d,  $J = 0.7$  Hz, 1H), 2.41 (s, 3H).  $^{13}\text{C NMR}$  (151 MHz,  $\text{CDCl}_3$ )  $\delta$  168.69, 146.76, 145.26, 135.64, 135.25, 134.89, 132.24, 130.54, 130.47, 129.72, 129.69, 129.15, 128.41, 128.27, 128.04, 126.97, 108.56, 21.81. HRMS (ESI) calcd. for  $\text{C}_{24}\text{H}_{20}\text{NO}_3\text{S}$  [ $\text{M}+\text{H}^+$ ]: 402.1158, found: 402.1148.

**(E)-3-(2-methylbenzylidene)-5-phenyl-1-tosyl-1,3-dihydro-2H-pyrrol-2-one (4b)**

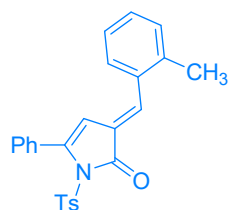

$^1\text{H NMR}$  (400 MHz,  $\text{CDCl}_3$ )  $\delta$  7.84 (d,  $J = 8.4$  Hz, 2H), 7.61 (s, 1H), 7.52 – 7.46 (m, 3H), 7.45 – 7.40 (m, 3H), 7.32 (d,  $J = 8.4$  Hz, 2H), 7.29 – 7.24 (m, 1H), 7.23 – 7.16 (m, 2H), 6.26 (d,  $J = 0.7$  Hz, 1H), 2.43 (s, 3H), 2.38 (s, 3H).  $^{13}\text{C NMR}$  (151 MHz,  $\text{CDCl}_3$ )  $\delta$  168.40, 146.68, 145.24, 139.15, 135.81, 133.84, 133.59, 132.29, 130.97, 130.37, 129.73, 129.62, 129.17, 128.38, 128.34, 128.03, 127.79, 126.36, 108.58, 21.85, 20.12. HRMS (ESI) calcd. for  $\text{C}_{25}\text{H}_{22}\text{NO}_3\text{S}$  [ $\text{M}+\text{H}^+$ ]: 416.1315, found: 416.1303.

**(E)-3-(4-methylbenzylidene)-5-phenyl-1-tosyl-1,3-dihydro-2H-pyrrol-2-one (4c)**

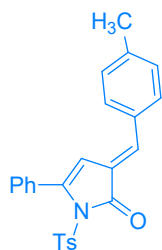

$^1\text{H}$  NMR (400 MHz,  $\text{CDCl}_3$ )  $\delta$  7.80 (d,  $J$  = 8.4 Hz, 2H), 7.55 – 7.48 (m, 2H), 7.47 – 7.40 (m, 5H), 7.35 – 7.26 (m, 3H), 7.19 (d,  $J$  = 8.1 Hz, 2H), 6.37 (d,  $J$  = 0.8 Hz, 1H), 2.41 (s, 3H), 2.36 (s, 3H).  $^{13}\text{C}$  NMR (151 MHz,  $\text{CDCl}_3$ )  $\delta$  168.82, 146.10, 145.18, 141.35, 135.68, 135.46, 132.36, 132.16, 130.59, 129.93, 129.69, 129.59, 128.42, 128.26, 128.02, 126.00, 108.72, 21.81, 21.71. HRMS (ESI) calcd. for  $\text{C}_{25}\text{H}_{22}\text{NO}_3\text{S}$  [ $\text{M}+\text{H}^+$ ]: 416.1315, found: 416.1307.

**(E)-3-(4-chlorobenzylidene)-5-phenyl-1-tosyl-1,3-dihydro-2H-pyrrol-2-one (4d)**

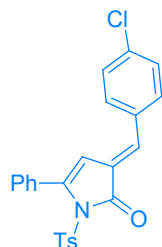

$^1\text{H}$  NMR (400 MHz,  $\text{CDCl}_3$ )  $\delta$  7.80 (d,  $J$  = 8.4 Hz, 2H), 7.55 – 7.47 (m, 3H), 7.47 – 7.41 (m, 4H), 7.36 (d,  $J$  = 8.5 Hz, 2H), 7.33 – 7.27 (m, 3H), 6.31 (d,  $J$  = 0.9 Hz, 1H), 2.42 (s, 3H).  $^{13}\text{C}$  NMR (151 MHz,  $\text{CDCl}_3$ )  $\delta$  168.51, 147.38, 145.35, 136.56, 135.62, 133.48, 133.40, 132.11, 131.56, 129.85, 129.76, 129.49, 128.42, 128.32, 128.10, 127.33, 108.10, 21.86. HRMS (ESI) calcd. for  $\text{C}_{24}\text{H}_{19}\text{ClNO}_3\text{S}$  [ $\text{M}+\text{H}^+$ ]: 436.0769, found: 436.0759.

**(E)-5-phenyl-1-tosyl-3-(4-(trifluoromethyl)benzylidene)-1,3-dihydro-2H-pyrrol-2-one (4e)**

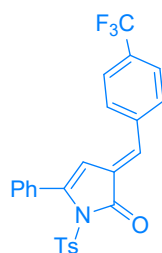

$^1\text{H}$  NMR (400 MHz,  $\text{CDCl}_3$ )  $\delta$  7.84 (d,  $J$  = 8.4 Hz, 2H), 7.66 (s, 4H), 7.57 – 7.51 (m, 2H), 7.51 – 7.44 (m, 3H), 7.39 – 7.31 (m, 3H), 6.35 (d,  $J$  = 0.8 Hz, 1H), 2.45 (s, 3H).  $^{13}\text{C}$  NMR (151 MHz,  $\text{CDCl}_3$ )  $\delta$  168.29, 148.47, 145.49, 138.27, 135.53, 132.67, 131.89, 131.63 (q,  $J$  = 32.8 Hz), 130.38, 130.03, 129.81, 128.97, 128.41, 128.33, 128.15, 126.03 (q,  $J$  = 3.7 Hz), 123.81 (q,  $J$  = 272.3 Hz), 107.87, 21.85. HRMS (ESI) calcd. for  $\text{C}_{25}\text{H}_{19}\text{F}_3\text{NO}_3\text{S}$  [ $\text{M}+\text{H}^+$ ]: 470.1032, found: 470.1015.

**(E)-5-phenyl-3-(thiophen-2-ylmethylene)-1-tosyl-1,3-dihydro-2H-pyrrol-2-one (4f)**

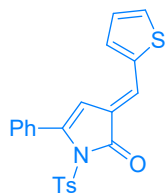

E/Z = 6:4;  $^1\text{H}$  NMR (400 MHz,  $\text{CDCl}_3$ )  $\delta$  7.81 (d,  $J$  = 8.2 Hz, 0.8H), 7.79 (d,  $J$  = 8.2 Hz, 2H), 7.75 (d,  $J$  = 3.6 Hz, 0.4H), 7.61 (d,  $J$  = 5.1 Hz, 0.4H), 7.54 (d,  $J$  = 2.2 Hz, 0.8H), 7.53 (d,  $J$  = 4.4 Hz, 2H), 7.47 – 7.43 (m, 5H), 7.42 – 7.34 (m, 1.2H), 7.35 (d,  $J$  = 3.7 Hz, 1H), 7.29 (d,  $J$  = 8.0 Hz, 2H), 7.27 (d,  $J$  = 8.0 Hz, 0.8H), 7.17 (s, 0.4H), 7.12 (dd,  $J$  = 5.0, 3.8 Hz, 0.4H), 7.09 (dd,  $J$  = 5.0, 3.8 Hz, 1H), 6.37 (d,  $J$  = 0.8 Hz, 1H), 5.93 (s, 0.4H), 2.40 (s, 3H), 2.39 (s, 1.2H).  $^{13}\text{C}$  NMR (151 MHz,  $\text{CDCl}_3$ )  $\delta$  168.62, 166.01, 145.66, 145.21, 144.99, 141.76, 139.03, 138.08, 137.22, 135.79, 135.59, 134.87, 134.08, 132.43, 132.28, 131.79, 131.56, 129.69, 129.65, 129.17, 128.46, 128.42, 128.23, 128.14, 128.03, 127.95, 127.90, 127.12, 124.16, 123.39, 113.05, 108.85, 21.80, 21.78.

HRMS (ESI) calcd. for  $\text{C}_{22}\text{H}_{18}\text{NO}_3\text{S}_2$  [ $\text{M}+\text{H}^+$ ]: 408.0723, found: 408.0705.

#### ethyl 5,7-diphenyl-8-tosyl-5,8-dihydro-2H-oxepino[2,3-b]pyrrole-4-carboxylate (5a)

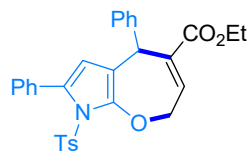

Isolated in 61% yield (62.6 mg) as yellow solid.

$^1\text{H}$  NMR (400 MHz,  $\text{CDCl}_3$ )  $\delta$  7.63 (d,  $J$  = 8.3 Hz, 2H), 7.43 – 7.38 (m, 2H), 7.36 – 7.26 (m, 5H), 7.17 – 7.12 (m, 3H), 7.07 – 6.96 (m, 3H), 5.91 (s, 1H), 5.06 (s, 1H), 4.52 (d,  $J$  = 6.0 Hz, 2H), 4.19 (qq,  $J$  = 10.9, 7.1 Hz, 2H), 2.45 (s, 3H), 1.25 (t,  $J$  = 7.1 Hz, 3H).  $^{13}\text{C}$  NMR (151 MHz,  $\text{CDCl}_3$ )  $\delta$  166.62, 146.46, 144.83, 143.02, 138.50, 135.93, 134.25, 133.21, 130.38, 129.62, 129.09, 128.39, 127.70, 127.56, 127.43, 126.63, 116.60, 107.21, 66.77, 61.58, 41.01, 21.84, 14.25. HRMS (ESI) calcd. for  $\text{C}_{30}\text{H}_{28}\text{NO}_5\text{S}$  [ $\text{M}+\text{H}^+$ ]: 514.1683, found: 514.1685.

#### ethyl 7-phenyl-5-(*o*-tolyl)-8-tosyl-5,8-dihydro-2H-oxepino[2,3-b]pyrrole-4-carboxylate (5b)

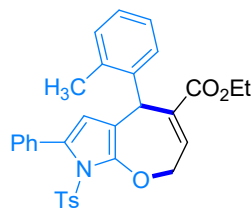

Isolated in 50% yield (52.7 mg) as yellow solid.

$^1\text{H}$  NMR (400 MHz,  $\text{CDCl}_3$ )  $\delta$  7.62 (d,  $J$  = 8.3 Hz, 2H), 7.34 – 7.27 (m, 5H), 7.25 – 7.19 (m, 3H), 7.08 – 6.99 (m, 4H), 5.83 (s, 1H), 5.20 (s, 1H), 4.73 (dd,  $J$  = 16.9, 4.9 Hz, 1H), 4.60 (dd,  $J$  = 16.9, 2.8 Hz, 1H), 4.12 – 3.97 (m, 2H), 2.46 (s, 3H), 2.39 (s, 3H), 1.13 (t,  $J$  = 7.1 Hz, 3H).  $^{13}\text{C}$  NMR (151 MHz,  $\text{CDCl}_3$ )  $\delta$  166.71, 145.00, 144.79, 141.34, 136.58, 136.00, 135.26, 135.00, 133.12, 130.48, 130.22, 129.66, 129.36, 128.07, 127.60, 127.56, 127.36, 126.58, 126.29, 114.34, 110.84, 68.98, 61.26, 38.71, 21.74, 20.04, 14.07. HRMS (ESI) calcd. for  $\text{C}_{31}\text{H}_{30}\text{NO}_5\text{S}$  [ $\text{M}+\text{H}^+$ ]: 528.1839, found: 528.1823.

**ethyl 7-phenyl-5-(p-tolyl)-8-tosyl-5,8-dihydro-2H-oxepino[2,3-b]pyrrole-4-carboxylate (5c)**

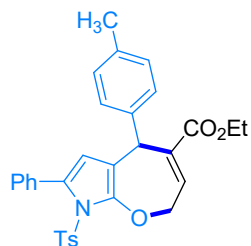

Isolated in 48% yield (50.6 mg) as yellow solid.

$^1\text{H}$  NMR (400 MHz,  $\text{CDCl}_3$ )  $\delta$  7.63 (d,  $J = 8.3$  Hz, 2H), 7.43 – 7.37 (m, 2H), 7.35 – 7.27 (m, 4H), 7.25 (d,  $J = 11.2$  Hz, 1H), 7.01 – 6.87 (m, 5H), 5.90 (s, 1H), 5.02 (s, 1H), 4.51 (d,  $J = 5.9$  Hz, 2H), 4.25 – 4.10 (m, 2H), 2.44 (s, 3H), 2.27 (s, 3H), 1.25 (t,  $J = 7.1$  Hz, 3H).  $^{13}\text{C}$  NMR (151 MHz,  $\text{CDCl}_3$ )  $\delta$  166.60, 146.42, 144.77, 140.01, 138.60, 136.18, 135.88, 134.01, 133.21, 130.29, 129.59, 129.06, 129.03, 127.64, 127.56, 127.48, 127.39, 116.64, 107.28, 66.72, 61.51, 40.63, 21.81, 21.09, 14.23. HRMS (ESI) calcd. For  $\text{C}_{31}\text{H}_{30}\text{NO}_5\text{S}$  [ $\text{M}+\text{H}^+$ ]: 528.1839, found: 528.1841.

**ethyl 5-(4-chlorophenyl)-7-phenyl-8-tosyl-5,8-dihydro-2H-oxepino[2,3-b]pyrrole-4-carboxylate (5d)**

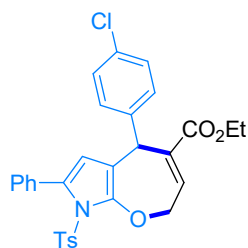

Isolated in 42% yield (46.1 mg) as yellow solid.

$^1\text{H}$  NMR (400 MHz,  $\text{CDCl}_3$ )  $\delta$  7.62 (d,  $J = 8.4$  Hz, 2H), 7.42 – 7.37 (m, 2H), 7.37 – 7.29 (m, 3H), 7.29 – 7.25 (m, 2H), 7.15 – 7.07 (m, 2H), 7.04 – 6.96 (m, 3H), 5.88 (s, 1H), 4.99 (s, 1H), 4.62 – 4.48 (m, 2H), 4.26 – 4.09 (m, 2H), 2.45 (s, 3H), 1.25 (t,  $J = 7.1$  Hz, 3H).  $^{13}\text{C}$  NMR (151 MHz,  $\text{CDCl}_3$ )  $\delta$  166.44, 146.14, 144.94, 141.58, 137.17, 135.95, 134.98, 133.02, 132.40, 130.58, 129.63, 129.16, 129.08, 128.50, 127.70, 127.68, 127.40, 115.84, 107.89, 67.24, 61.65, 40.71, 21.83, 14.24. HRMS (ESI) calcd. For  $\text{C}_{30}\text{H}_{27}\text{ClNO}_5\text{S}$  [ $\text{M}+\text{H}^+$ ]: 548.1293, found: 548.1283.

**ethyl 7-phenyl-8-tosyl-5-(4-(trifluoromethyl)phenyl)-5,8-dihydro-2H-oxepino[2,3-b]pyrrole-4-carboxylate (5e)**

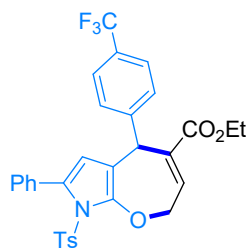

Isolated in 53% yield (61.6 mg) as yellow solid.

$^1\text{H}$  NMR (400 MHz,  $\text{CDCl}_3$ )  $\delta$  7.62 (d,  $J = 8.3$  Hz, 2H), 7.44 – 7.37 (m, 4H), 7.36 – 7.29 (m, 3H), 7.27 (s, 1H), 7.24 (d,  $J = 5.7$  Hz, 1H), 7.20 (d,  $J = 8.1$  Hz, 2H), 7.05 (t,  $J = 5.4$  Hz, 1H), 5.90 (s, 1H), 5.07 (s, 1H), 4.65 – 4.50 (m, 2H), 4.26 – 4.10 (m, 2H), 2.42 (s, 3H), 1.24 (t,  $J = 7.1$  Hz, 3H).  $^{13}\text{C}$  NMR (151 MHz,  $\text{CDCl}_3$ )  $\delta$  166.31, 147.06, 146.12, 145.00, 136.48, 135.88, 135.55, 132.93, 130.65, 129.64, 129.15, 128.79 (q,  $J = 32.4$  Hz), 128.02, 127.69, 127.67, 127.38, 125.30 (q,  $J = 3.6$  Hz), 124.21 (q,  $J = 272.0$  Hz), 115.58, 107.91, 67.38, 61.68, 41.13, 21.67, 14.17. HRMS (ESI) calcd. For  $\text{C}_{31}\text{H}_{27}\text{F}_3\text{NO}_5\text{S}$  [ $\text{M}+\text{H}^+$ ]: 582.1557, found: 582.1543.

**ethyl 7-phenyl-5-(thiophen-2-yl)-8-tosyl-5,8-dihydro-2H-oxepino[2,3-b]pyrrole-4-carboxylate (5f)**

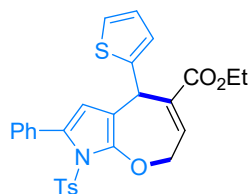

Isolated in 50% yield (51.9 mg) as yellow solid.

$^1\text{H}$  NMR (400 MHz,  $\text{CDCl}_3$ )  $\delta$  7.61 (d,  $J = 8.3$  Hz, 2H), 7.48 – 7.40 (m, 2H), 7.37 – 7.27 (m, 4H), 7.25 (d,  $J = 8.7$  Hz, 1H), 7.08 (dd,  $J = 5.1, 1.2$  Hz, 1H), 7.00 (t,  $J = 6.3$  Hz, 1H), 6.78 (dd,  $J = 5.1, 3.5$  Hz, 1H), 6.45 (dt,  $J = 3.4, 1.1$  Hz, 1H), 5.97 (s, 1H), 5.28 (s, 1H), 4.53 (d,  $J = 6.3$  Hz, 2H), 4.33 – 4.14 (m, 2H), 2.42 (s, 3H), 1.29 (t,  $J = 7.1$  Hz, 3H).  $^{13}\text{C}$  NMR (151 MHz,  $\text{CDCl}_3$ )  $\delta$  166.03, 146.77, 146.69, 144.87, 138.85, 135.69, 134.16, 133.11, 130.20, 129.63, 129.03, 127.66, 127.53, 127.32, 126.40, 124.75, 124.38, 116.51, 106.13, 66.13, 61.70, 36.25, 21.75, 14.25. HRMS (ESI) calcd. For  $\text{C}_{28}\text{H}_{26}\text{NO}_5\text{S}_2$  [ $\text{M}+\text{H}^+$ ]: 520.1247, found: 520.1231.

**methyl 5,7-diphenyl-8-tosyl-5,8-dihydro-2H-oxepino[2,3-b]pyrrole-4-carboxylate (5g)**

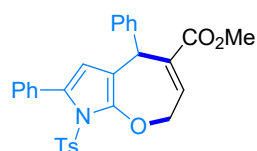

Isolated in 55% yield (54.9 mg) as yellow solid.

$^1\text{H}$  NMR (400 MHz,  $\text{CDCl}_3$ )  $\delta$  7.63 (d,  $J = 8.3$  Hz, 2H), 7.44 – 7.39 (m, 2H), 7.38 – 7.27 (m, 5H), 7.19 – 7.13 (m, 3H), 7.06 – 6.98 (m, 3H), 5.92 (s, 1H), 5.06 (s, 1H), 4.59 – 4.48 (m, 2H), 3.75 (s, 3H), 2.45 (s, 3H).  $^{13}\text{C}$  NMR (151 MHz,  $\text{CDCl}_3$ )  $\delta$  167.09, 146.44, 144.84, 142.91, 138.25, 135.87, 134.55, 133.17, 130.39, 129.62, 129.09, 128.41, 127.69, 127.65, 127.57, 127.42, 126.66, 116.56, 107.17, 66.71, 52.61, 40.98, 21.85. HRMS (ESI) calcd. for  $\text{C}_{29}\text{H}_{26}\text{NO}_5\text{S}$  [ $\text{M}+\text{H}^+$ ]: 500.1526, found: 500.1547.

**(2,4-diphenyl-8-tosyl-7,8-dihydro-4H-furo[2,3-b]azepin-5-yl)methanol (7)**

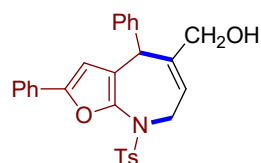

Isolated in 72% yield (51.2 mg) as colorless oil.

$^1\text{H}$  NMR (400 MHz,  $\text{CDCl}_3$ )  $\delta$  7.70 (d,  $J = 8.3$  Hz, 2H), 7.57 – 7.50 (m, 2H), 7.35 – 7.26 (m, 7H), 7.25 – 7.16 (m, 4H), 6.17 (s, 1H), 5.77 (t,  $J = 6.0$  Hz, 1H), 4.48 (dd,  $J = 16.3, 7.1$  Hz, 1H), 4.38 – 4.24 (m, 2H), 3.60 (s, 2H), 2.45 (s, 3H).  $^{13}\text{C}$  NMR (151 MHz,  $\text{CDCl}_3$ )  $\delta$  150.02, 144.25, 143.77, 142.79, 142.14, 136.90, 130.03, 129.57, 129.01, 128.71, 128.51, 128.24, 127.71, 127.33, 123.73, 121.76, 117.04, 108.01, 67.00, 47.39, 43.62, 21.70. HRMS (ESI) calcd. for  $\text{C}_{28}\text{H}_{26}\text{NO}_4\text{S}$  [ $\text{M}+\text{H}^+$ ]: 472.1577, found: 472.1558.

**ethyl (Z)-7-oxo-6-(2-oxo-2-phenylethylidene)-5-phenyl-1-tosyl-2,5,6,7-tetrahydro-1H-azepine-4-carboxylate (8)**

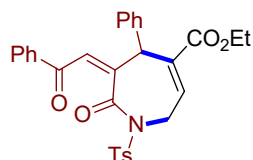

Isolated in 68% yield (36.0 mg) as yellow solid.

$^1\text{H}$  NMR (600 MHz,  $\text{CDCl}_3$ )  $\delta$  7.92 (d,  $J = 8.1$  Hz, 2H), 7.78 (d,  $J = 7.5$  Hz, 2H), 7.55 (t,  $J = 7.2$  Hz, 1H), 7.42 (t,  $J = 7.6$  Hz, 2H), 7.38 – 7.34 (m, 1H), 7.31 (d,  $J = 8.0$  Hz, 2H), 7.20 (s, 3H), 7.05 (d,  $J = 3.6$  Hz, 2H), 6.87 (s, 1H), 4.98 (t,  $J = 12.7$  Hz, 2H), 4.55 (dd,  $J = 17.7, 2.6$  Hz, 1H), 4.19 – 3.95 (m, 2H), 2.45 (s, 3H), 1.10 (t,  $J = 7.0$  Hz, 3H).  $^{13}\text{C}$  NMR (151 MHz,  $\text{CDCl}_3$ )  $\delta$  189.25, 167.81, 165.59, 151.80, 144.86, 136.90, 136.58, 136.27, 135.89, 133.85, 129.45, 128.99, 128.83, 128.79, 128.03, 127.91, 126.57, 61.51, 50.48, 42.43, 21.84, 14.02. HRMS (ESI) calcd. for  $\text{C}_{30}\text{H}_{28}\text{NO}_6\text{S}$  [ $\text{M}+\text{H}^+$ ]: 530.1632, found: 530.1619.

**ethyl 2,4-diphenyl-4H-furo[2,3-b]azepine-5-carboxylate (9)**

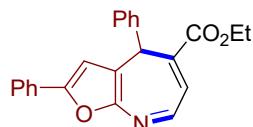

Isolated in 99% yield (35.4 mg) as orange solid.

$^1\text{H}$  NMR (400 MHz,  $\text{CDCl}_3$ )  $\delta$  7.76 – 7.72 (m, 2H), 7.70 (d,  $J = 4.6$  Hz, 1H), 7.44 – 7.37 (m, 2H), 7.35 – 7.28 (m, 1H), 7.25 – 7.20 (m, 2H), 7.19 – 7.14 (m, 2H), 7.13 – 7.06 (m, 2H), 6.67 (s, 1H), 5.57 (s, 1H), 4.39 – 4.24 (m, 2H), 1.36 (t,  $J = 7.1$  Hz, 3H).  $^{13}\text{C}$  NMR (151 MHz,  $\text{CDCl}_3$ )  $\delta$  166.72, 156.21, 154.02, 147.90, 141.82, 136.15, 129.87, 128.97, 128.82, 128.76, 128.40, 127.31, 126.90, 124.36, 116.93, 108.47, 62.25, 39.73, 14.35. HRMS (ESI) calcd. for  $\text{C}_{23}\text{H}_{20}\text{NO}_3$  [ $\text{M}+\text{H}^+$ ]: 358.1438, found: 358.1432.



## 7. <sup>1</sup>H NMR, <sup>13</sup>C NMR and HPLC Spectra

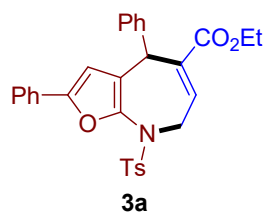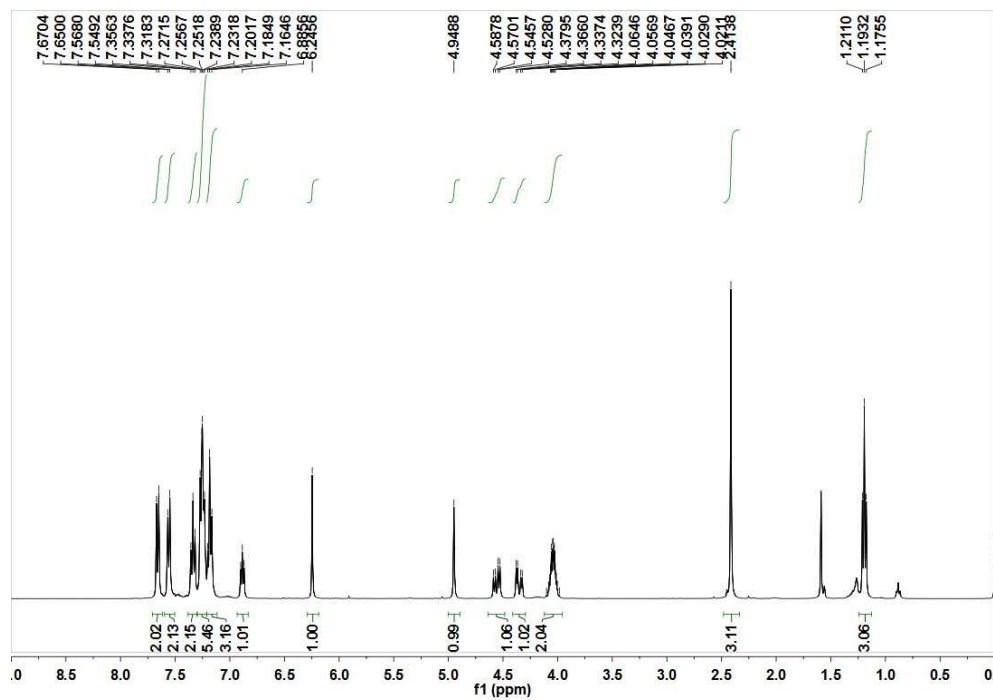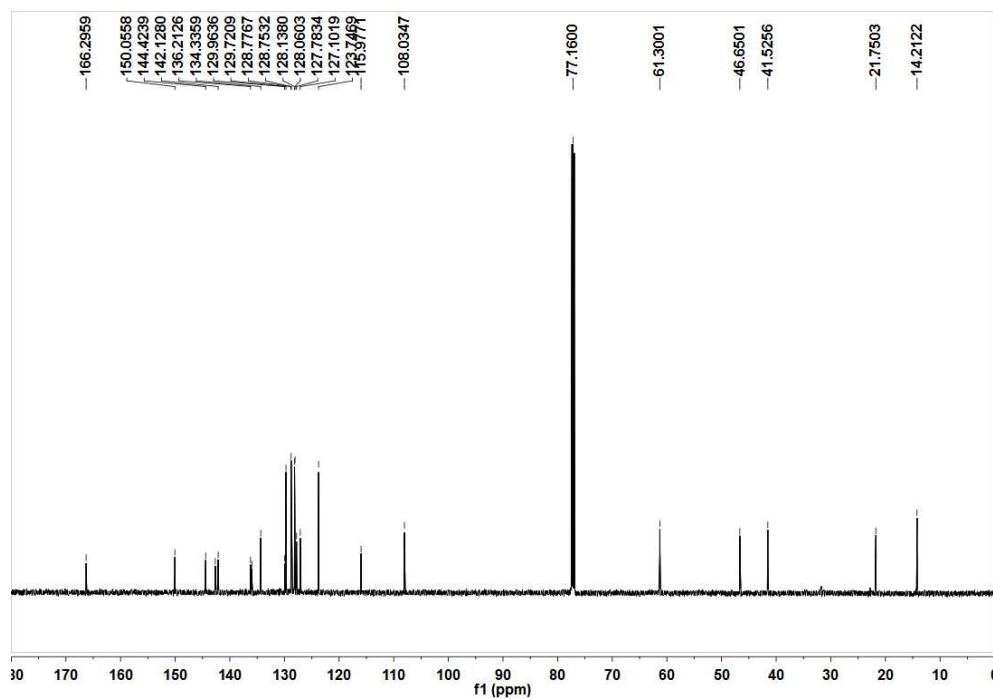

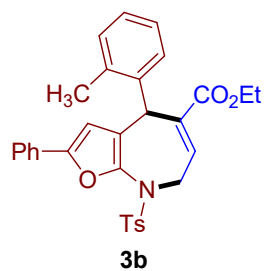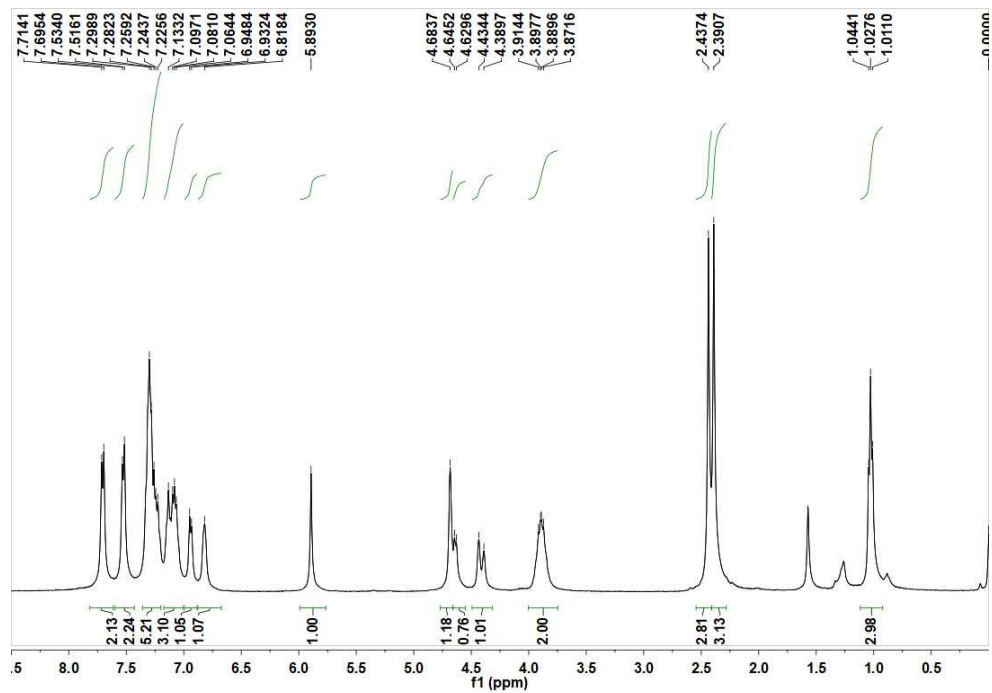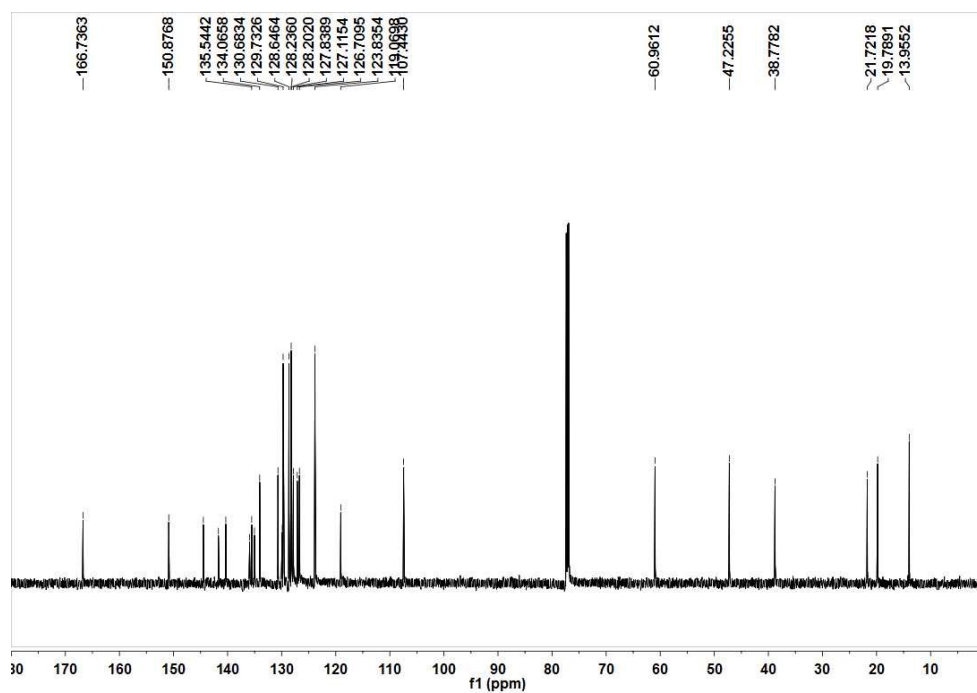

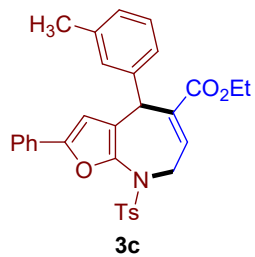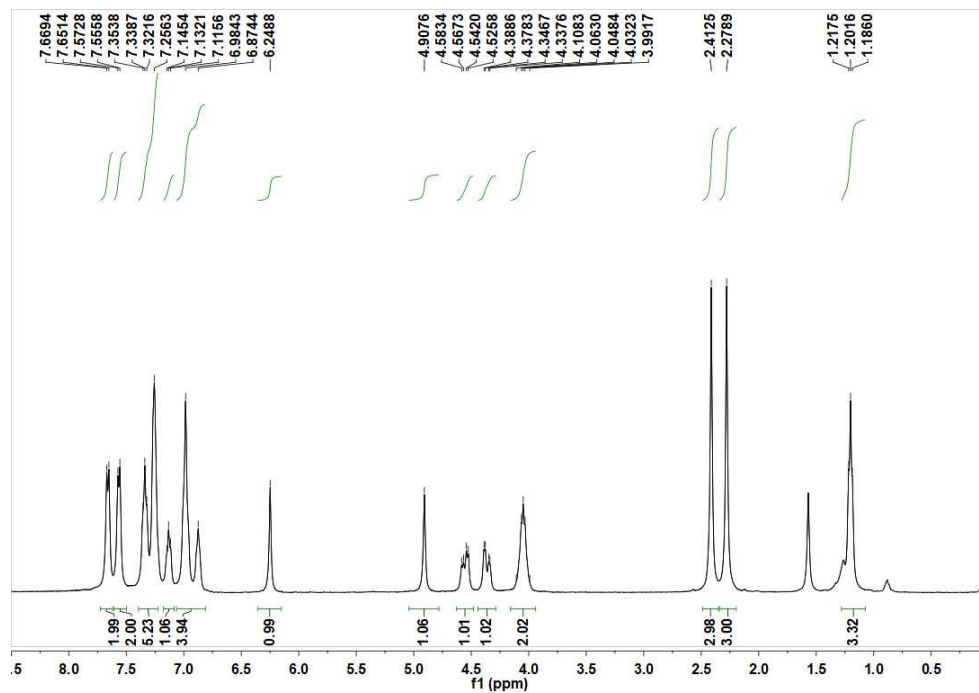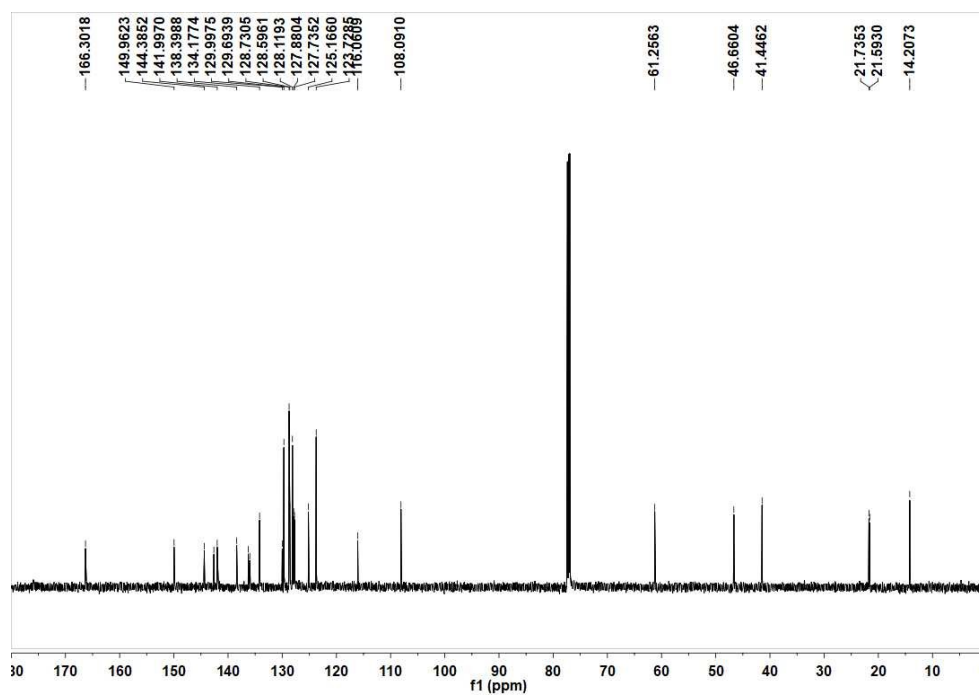

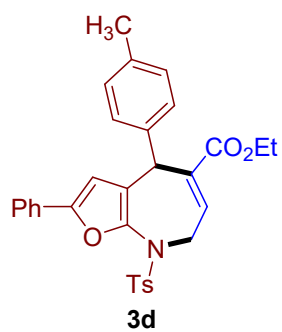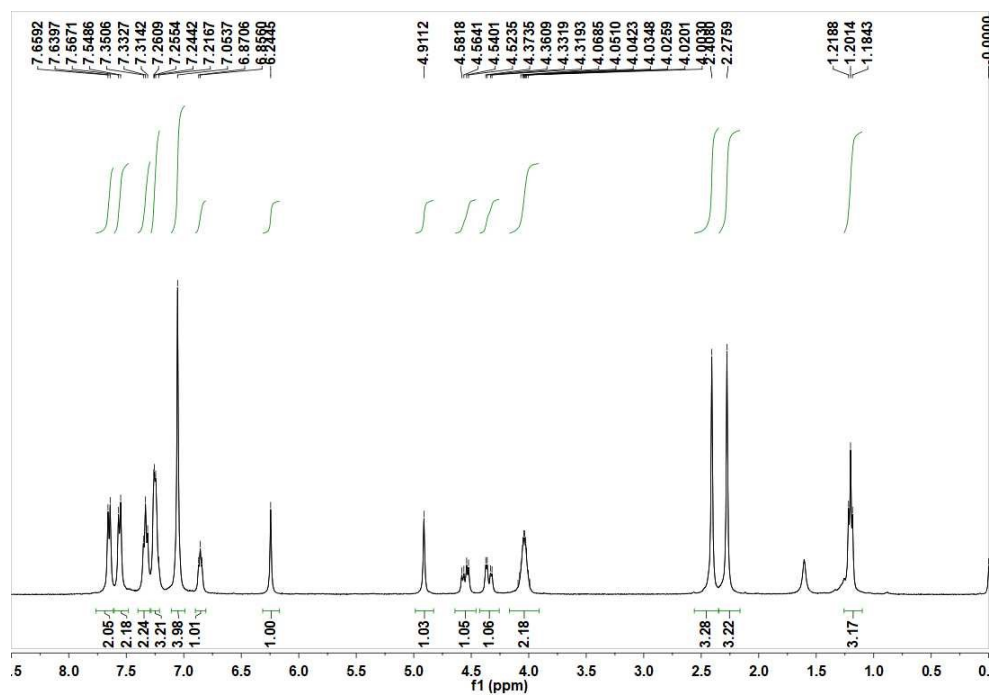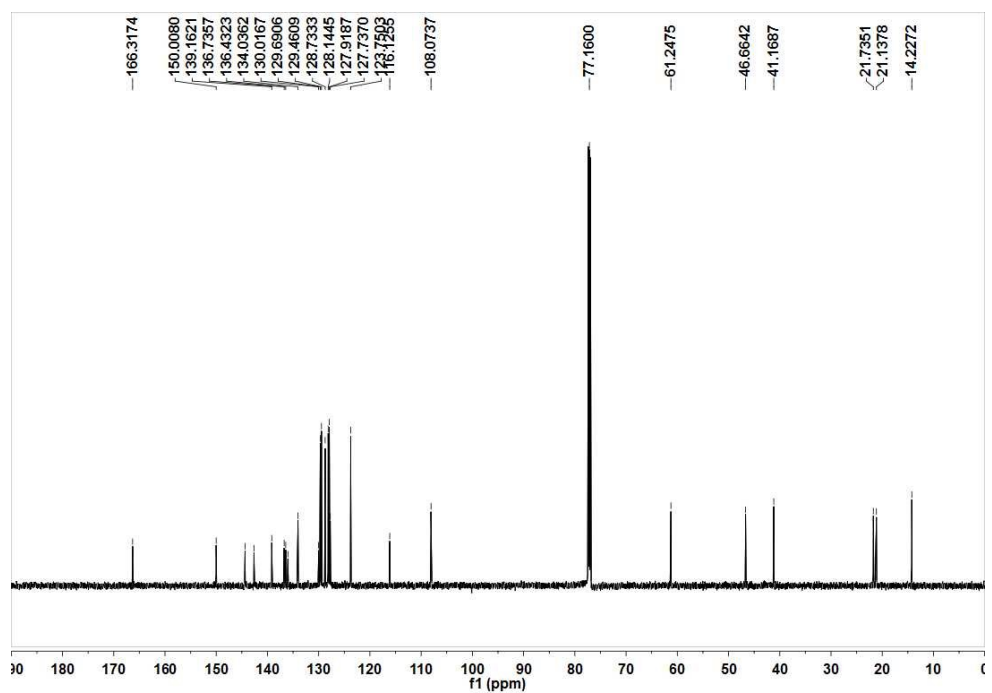

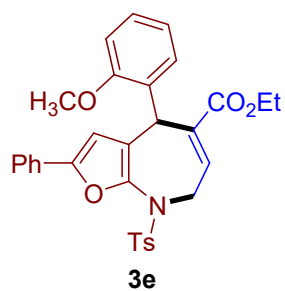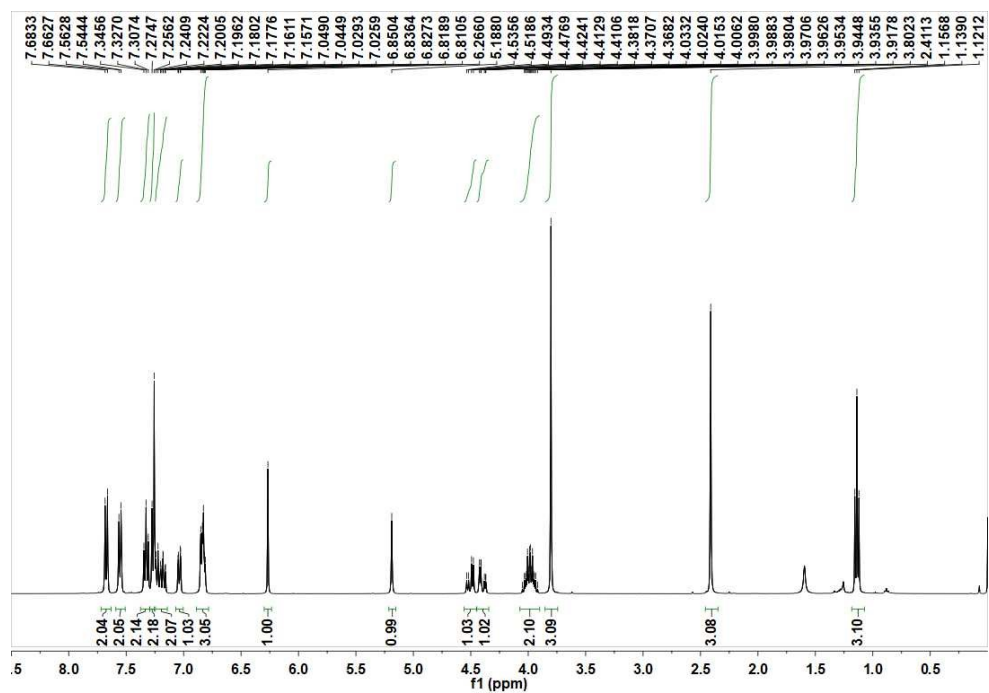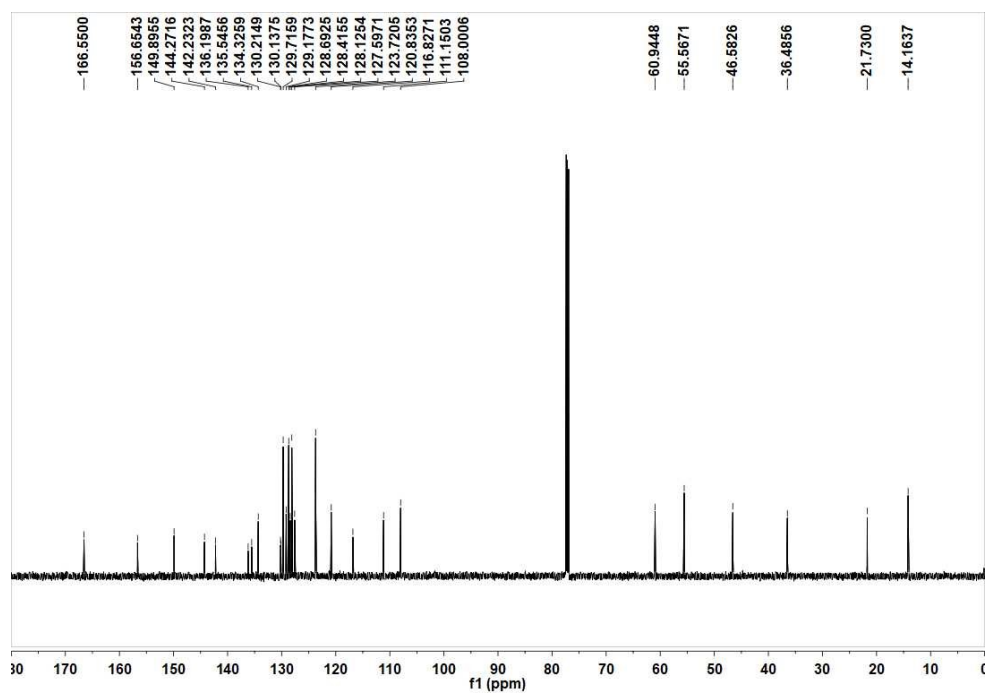

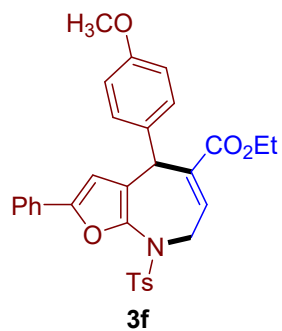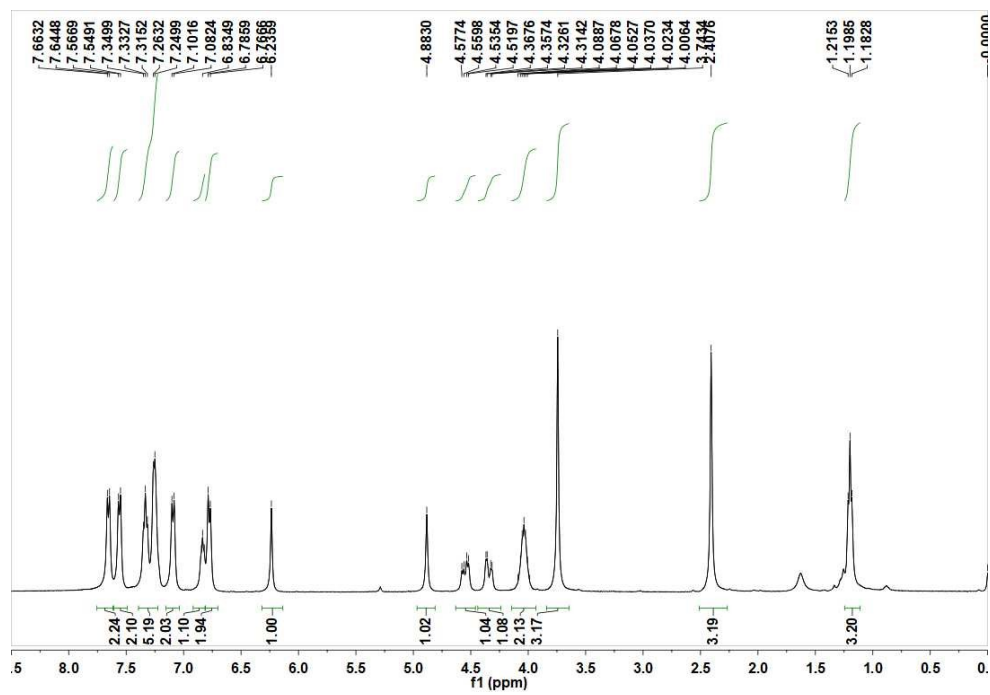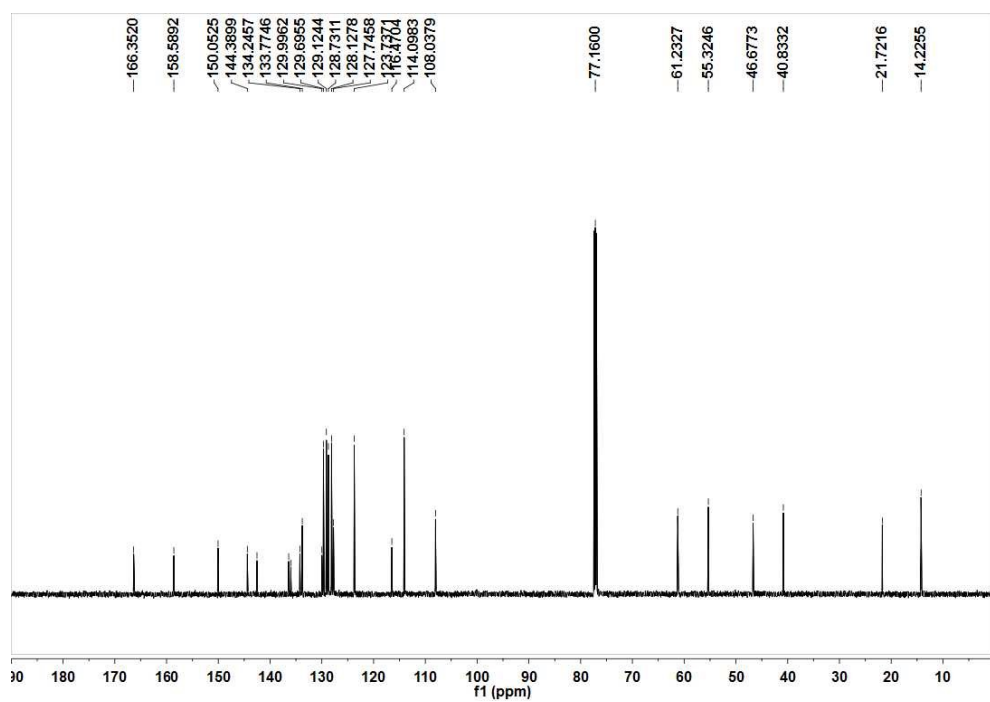

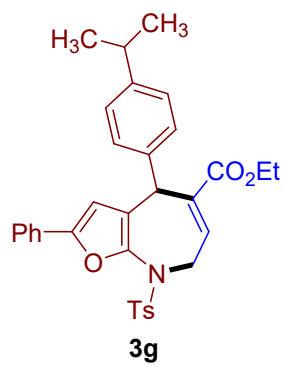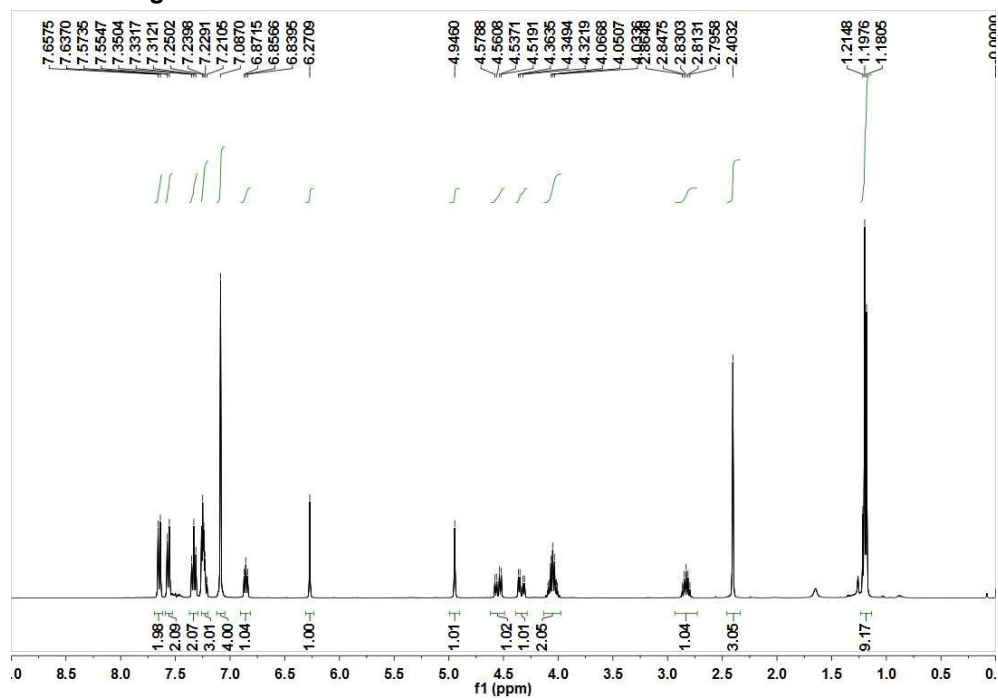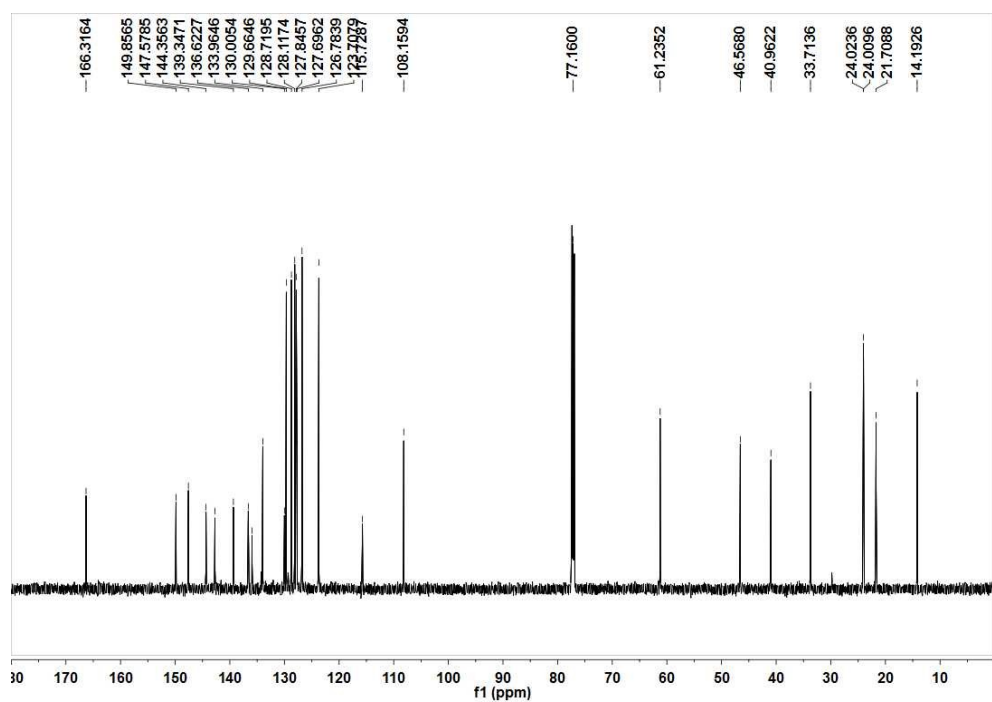

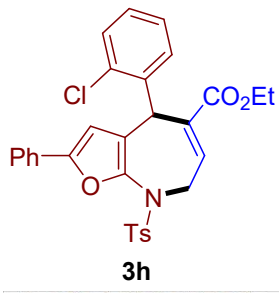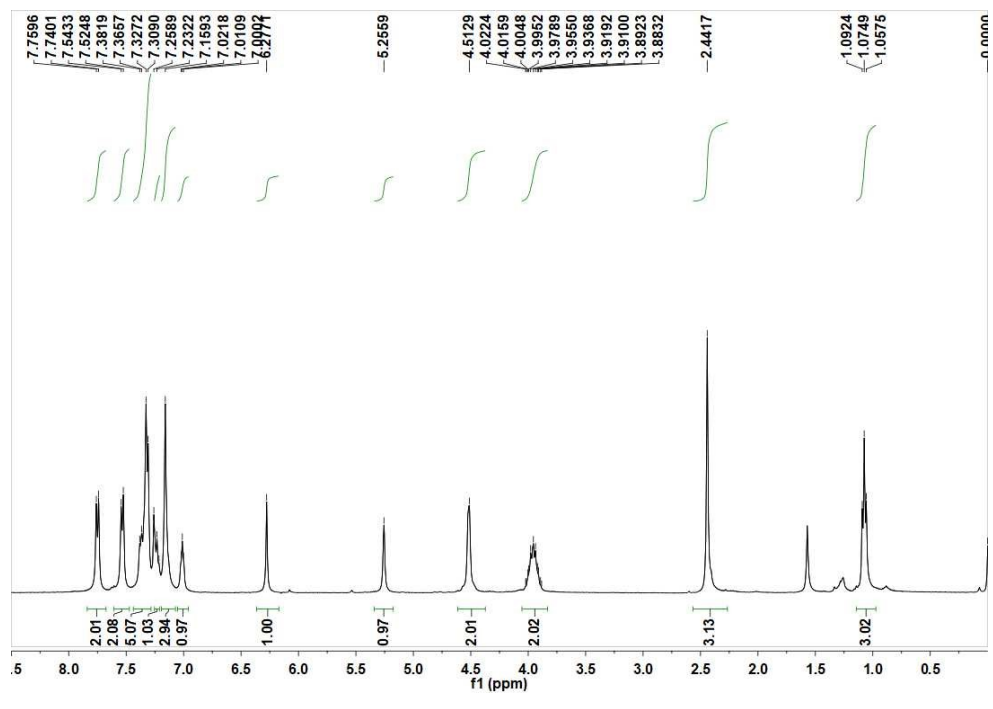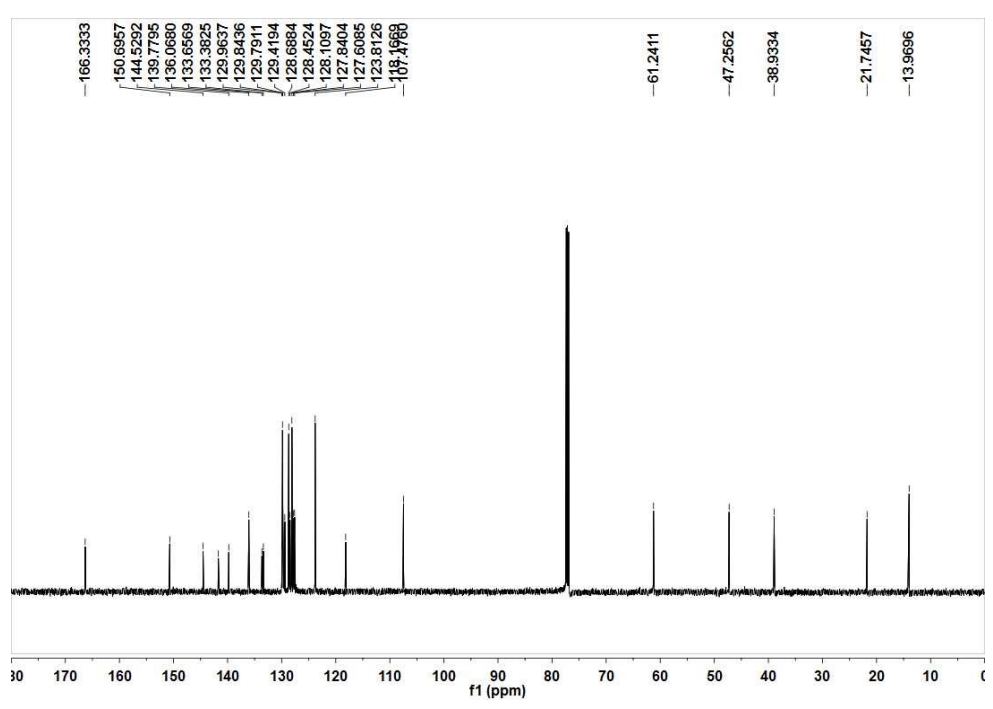



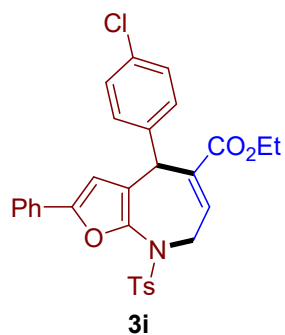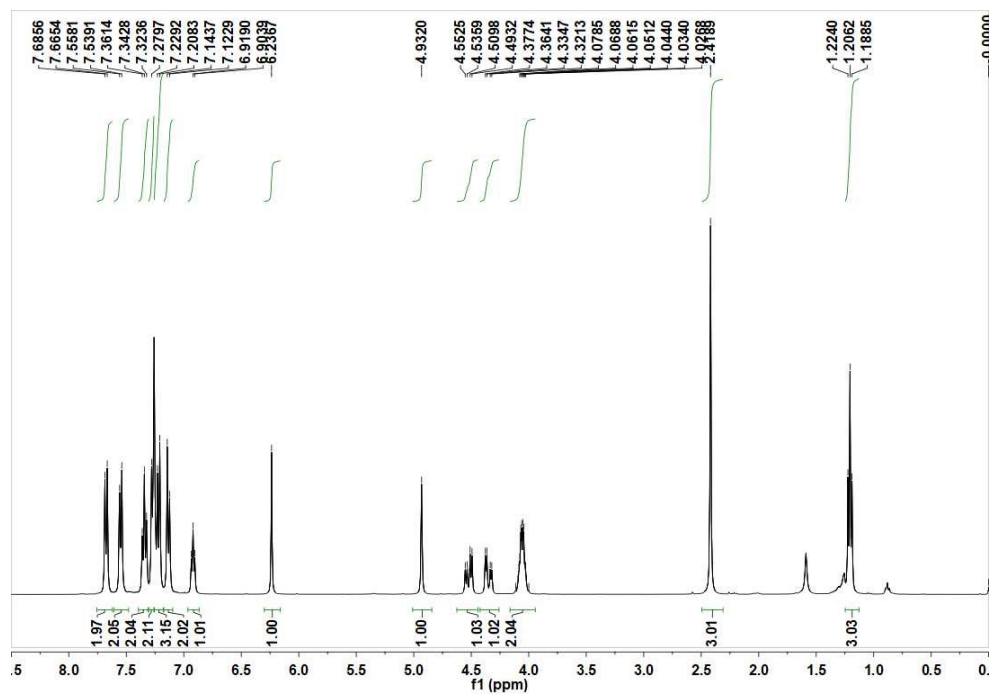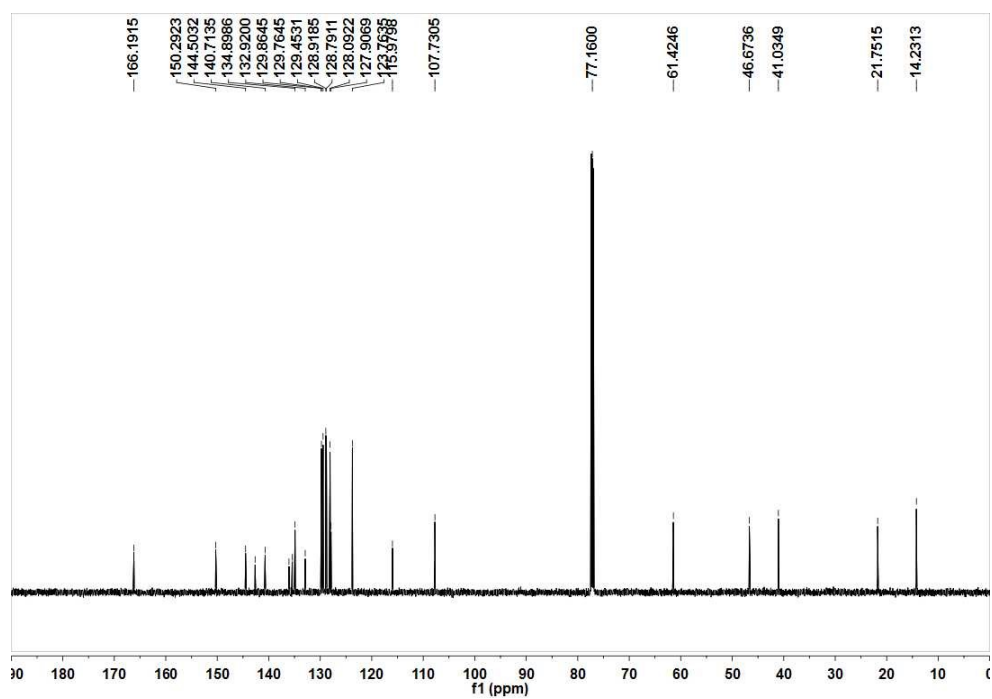

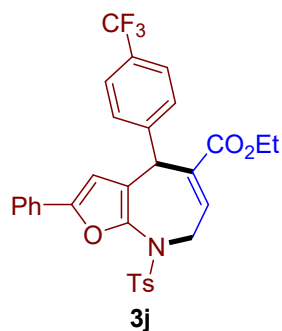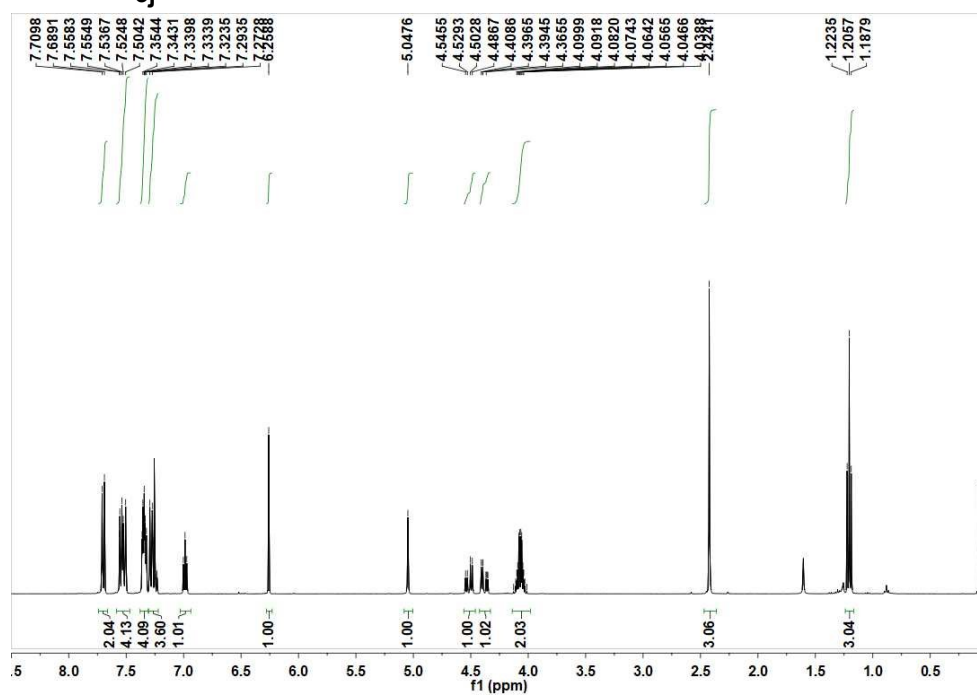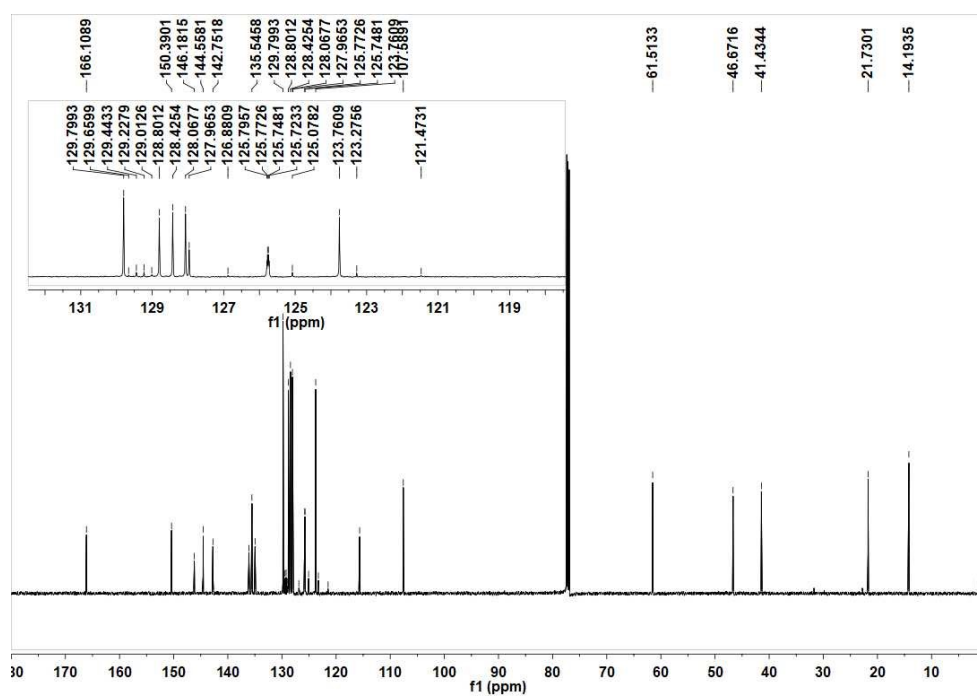

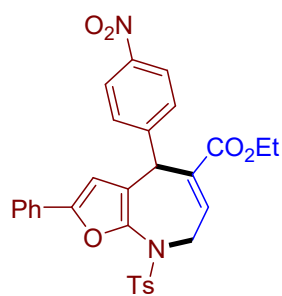

**3k**

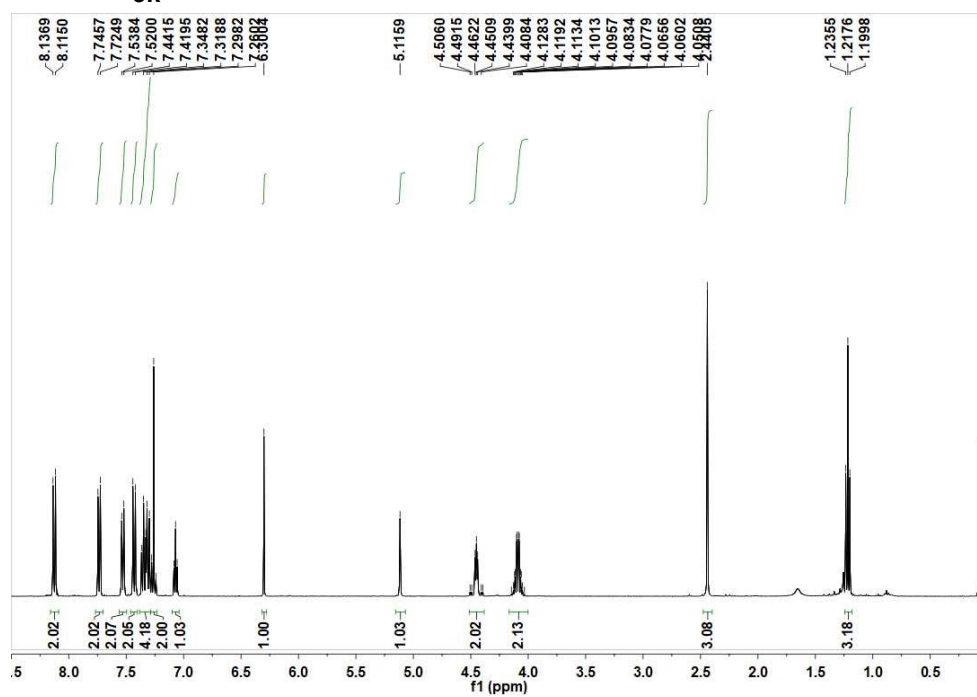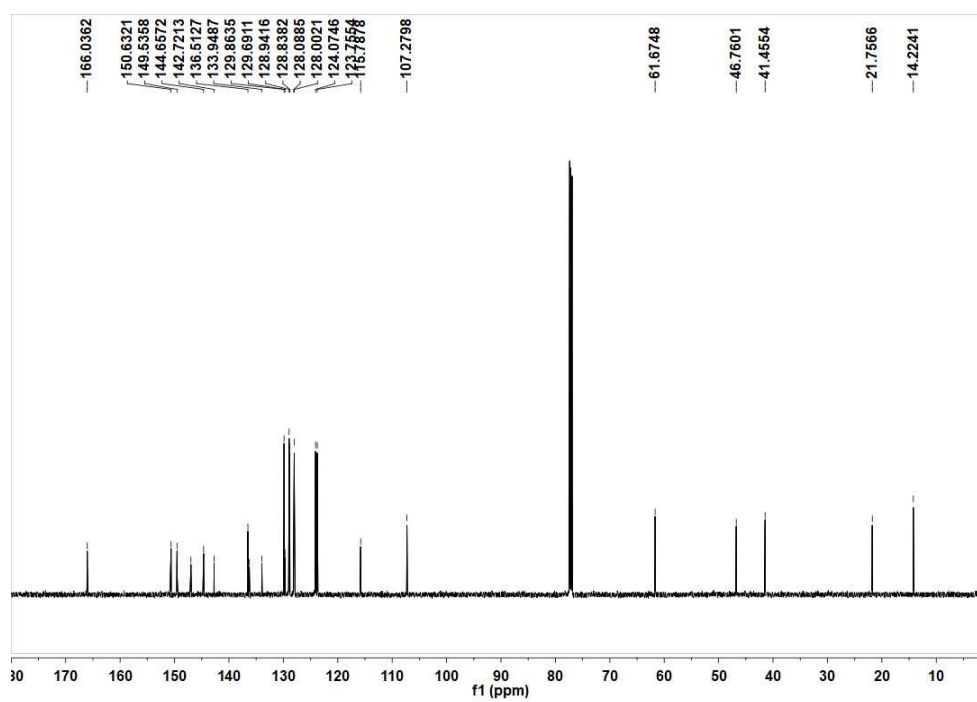

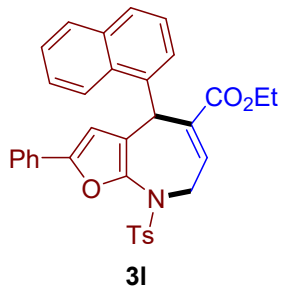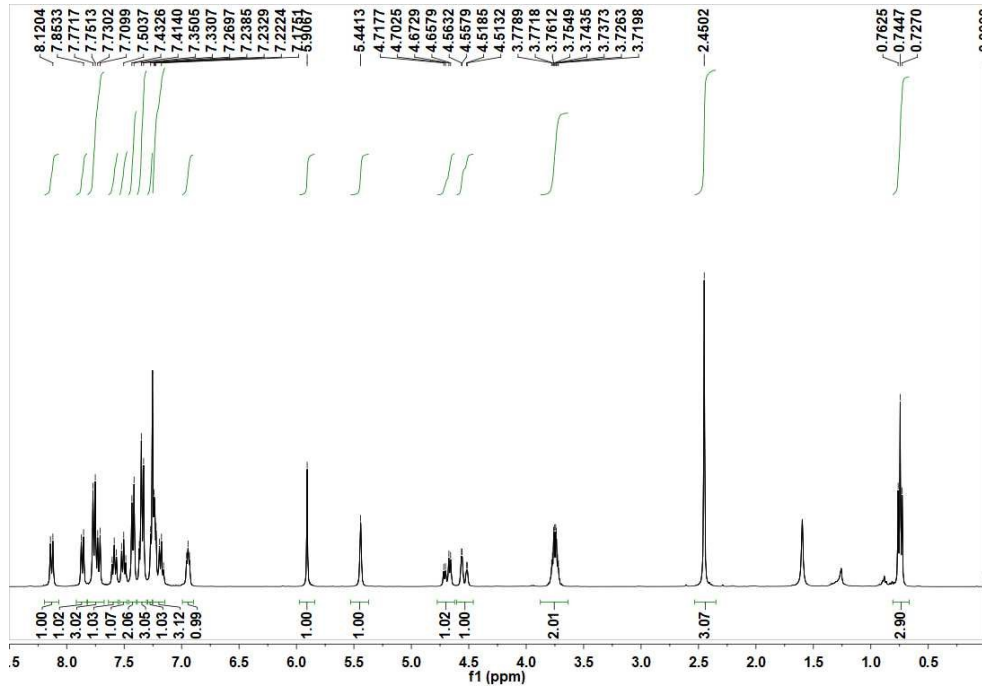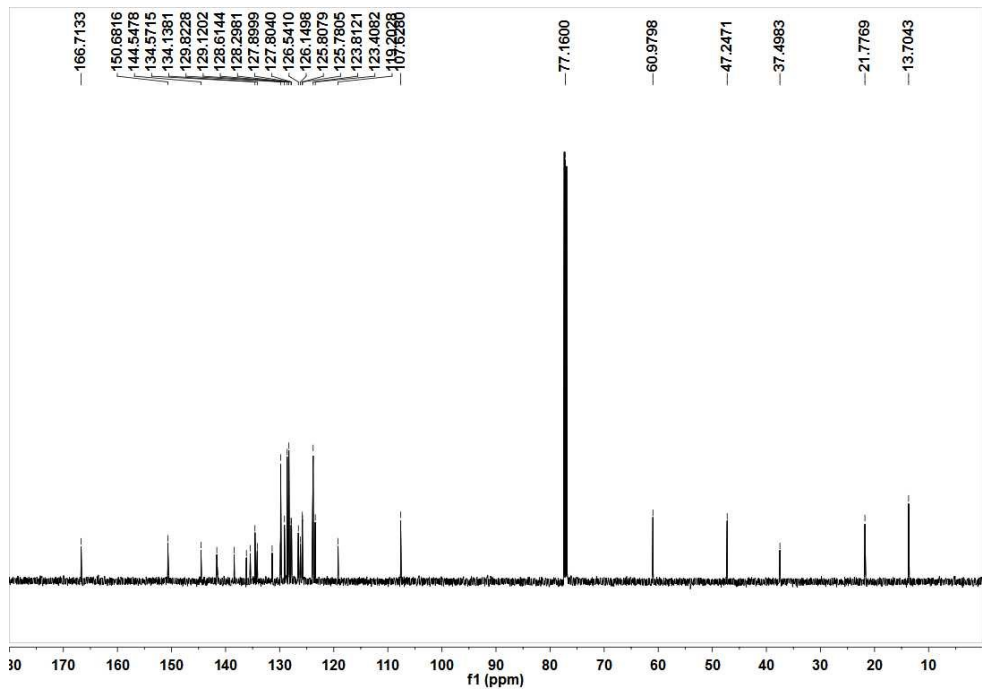

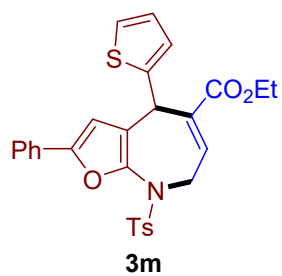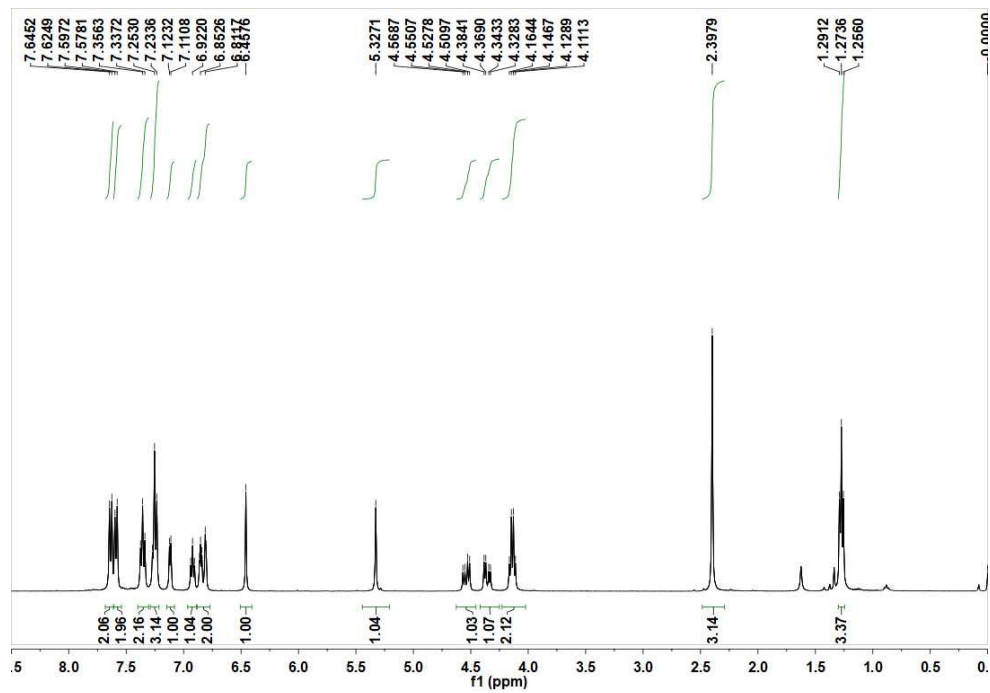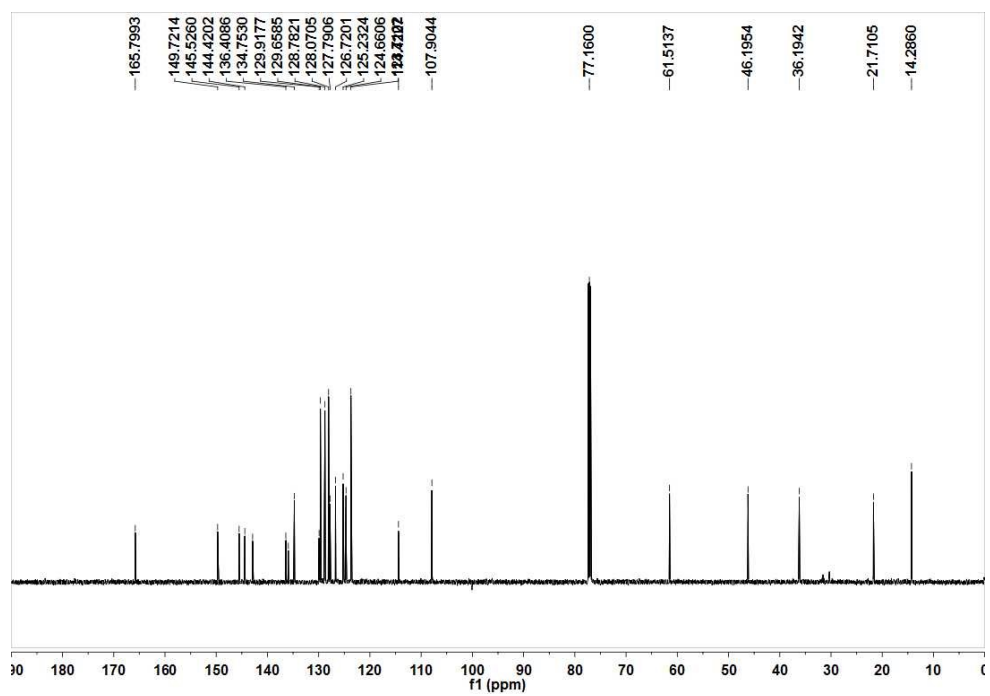

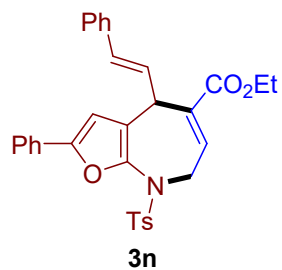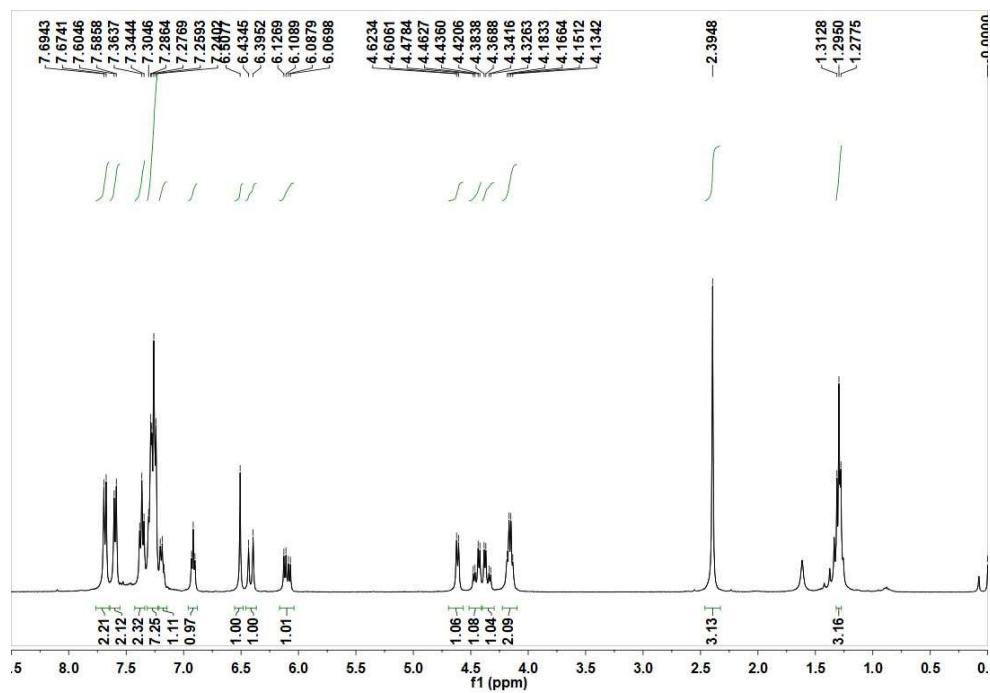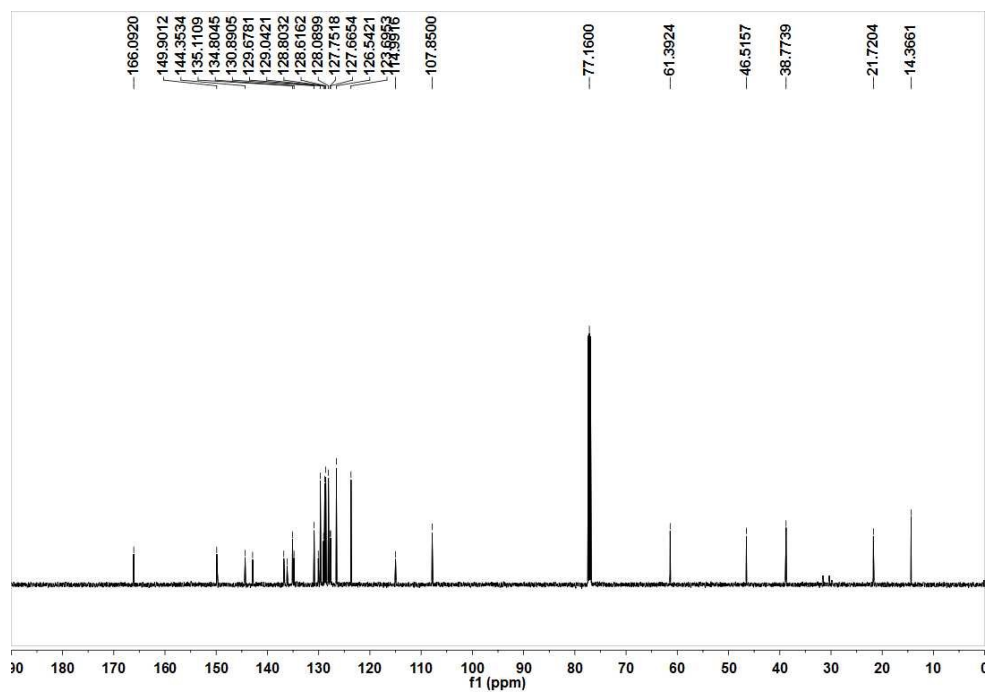

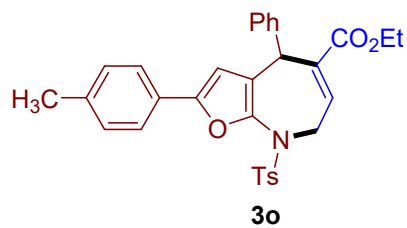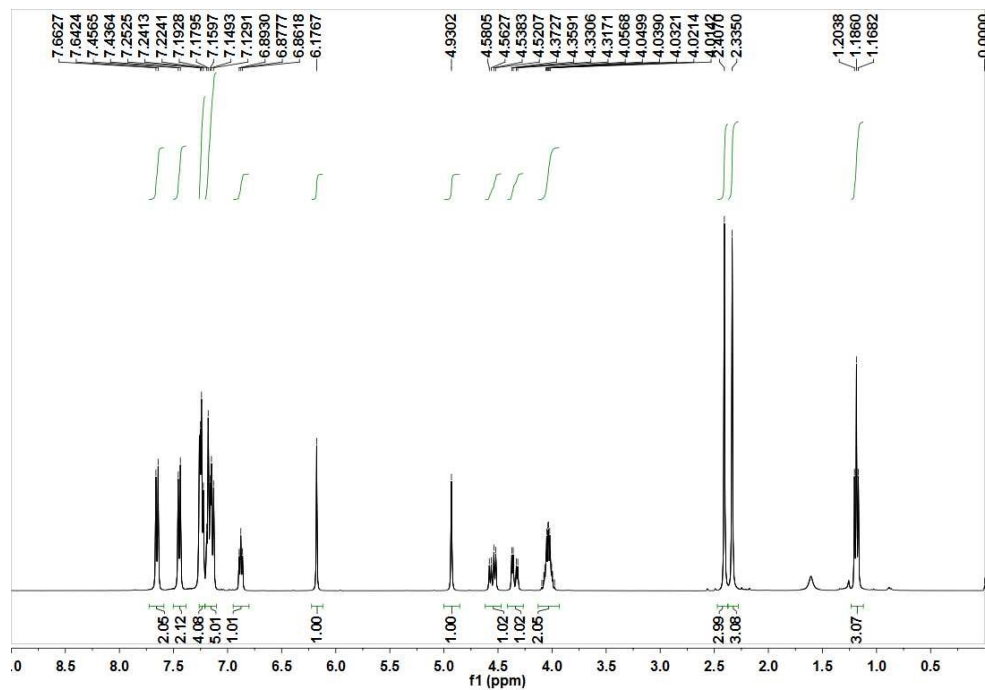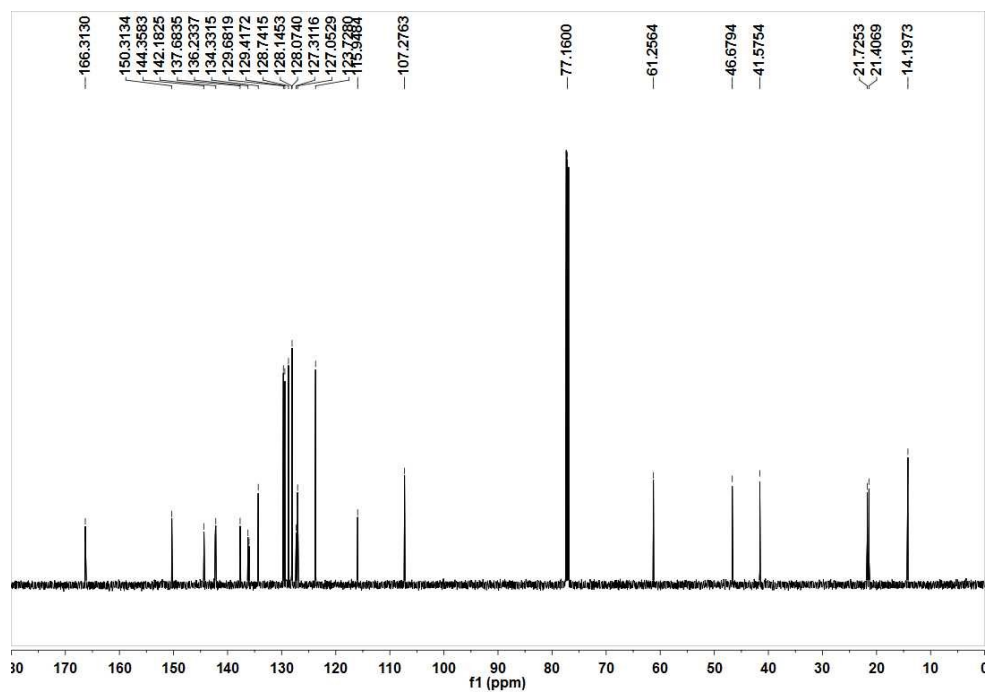

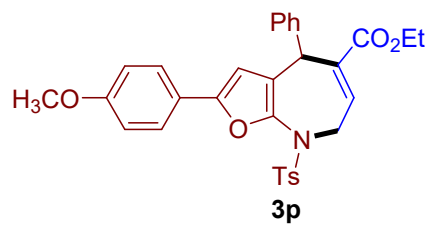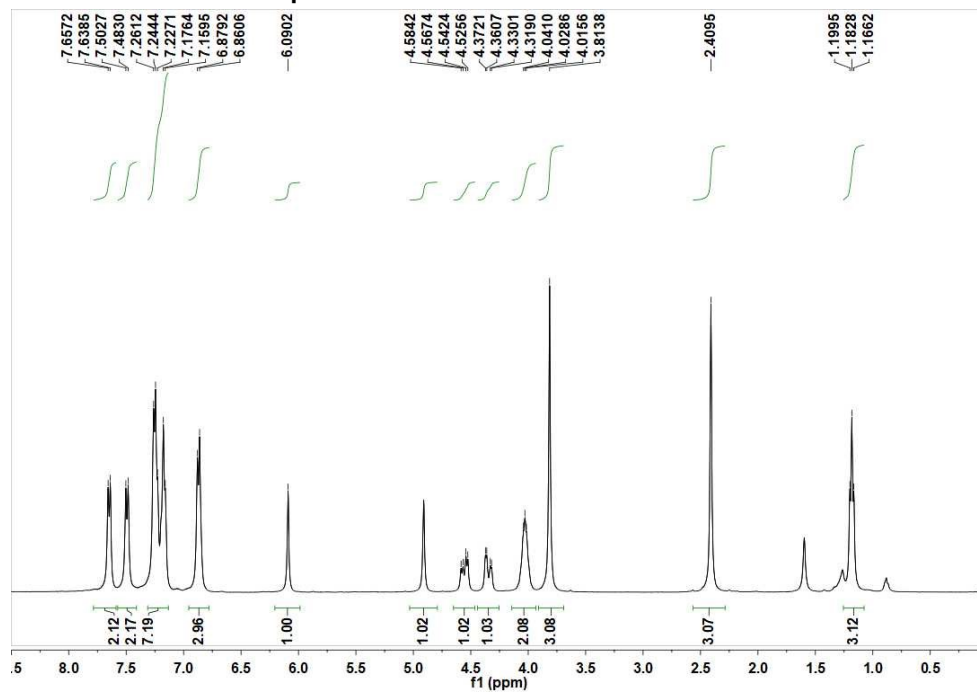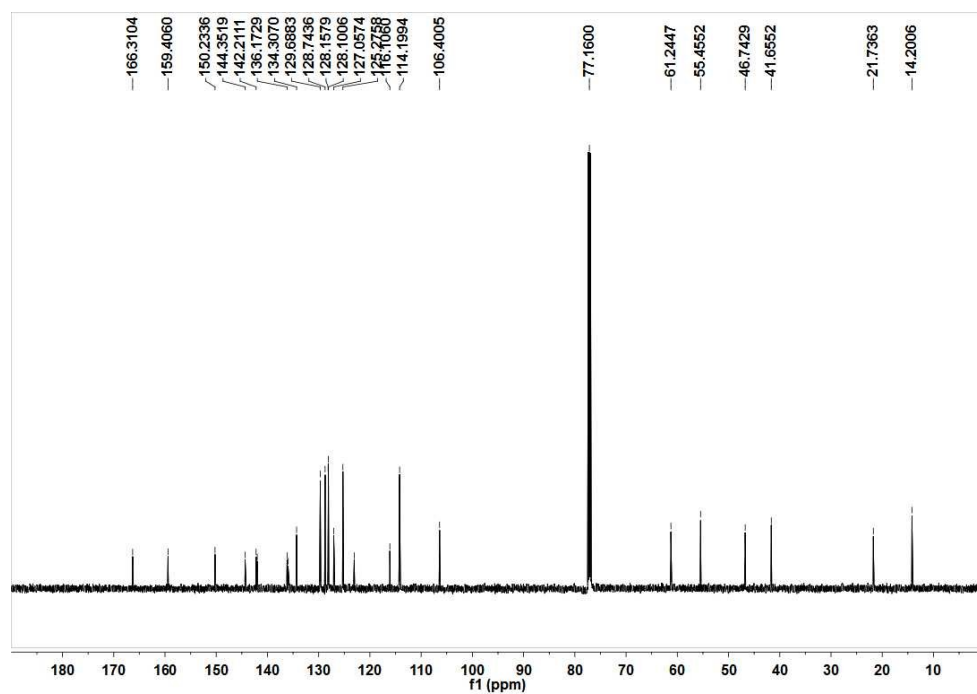



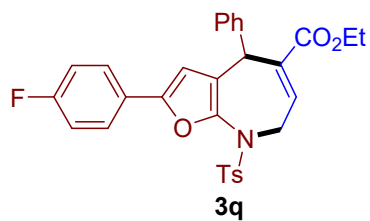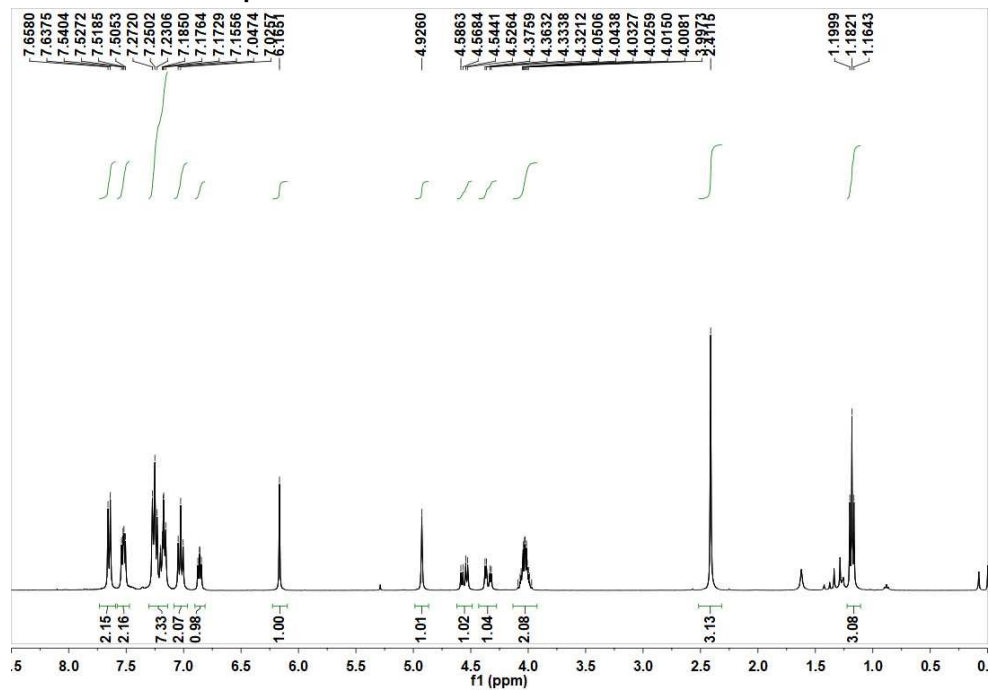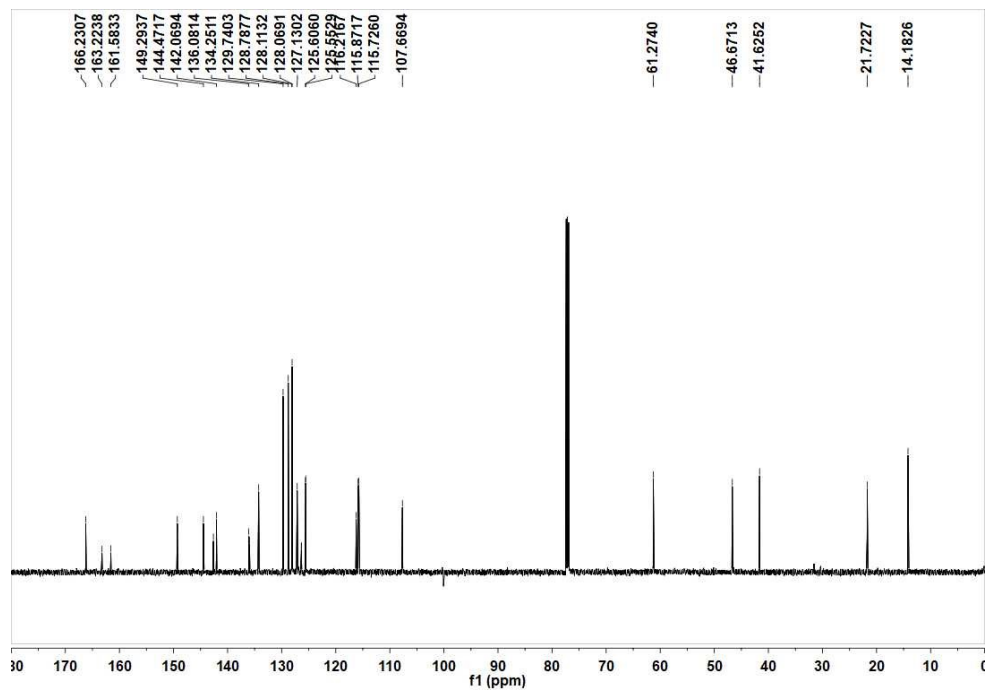

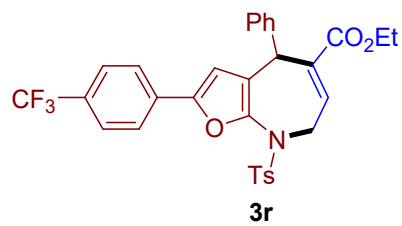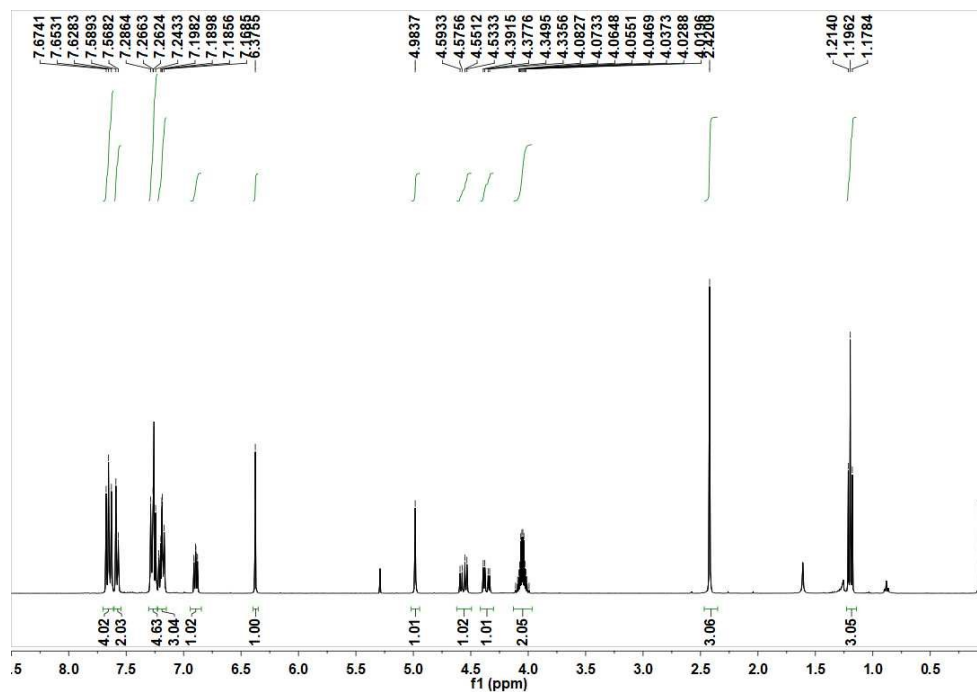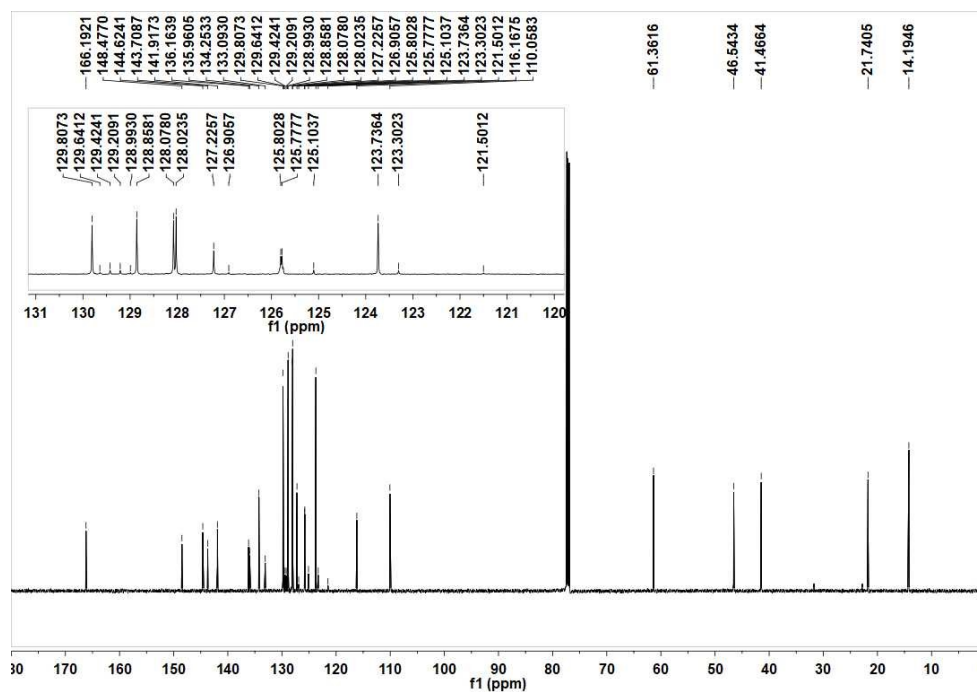

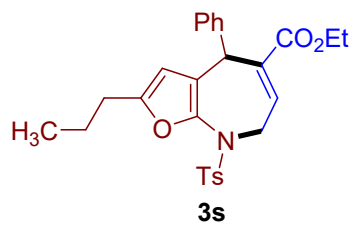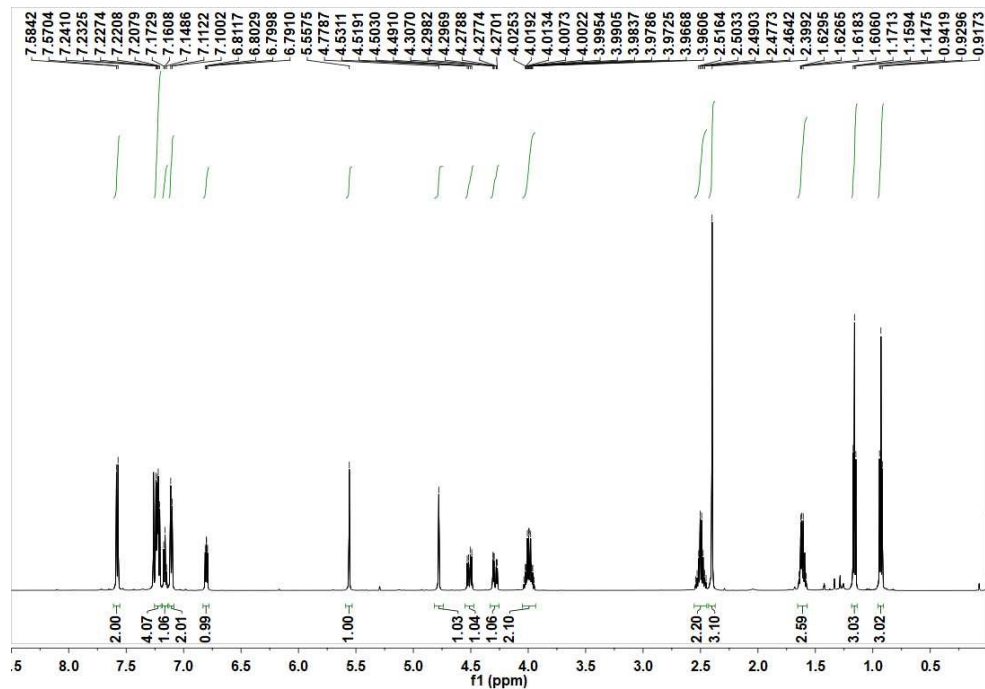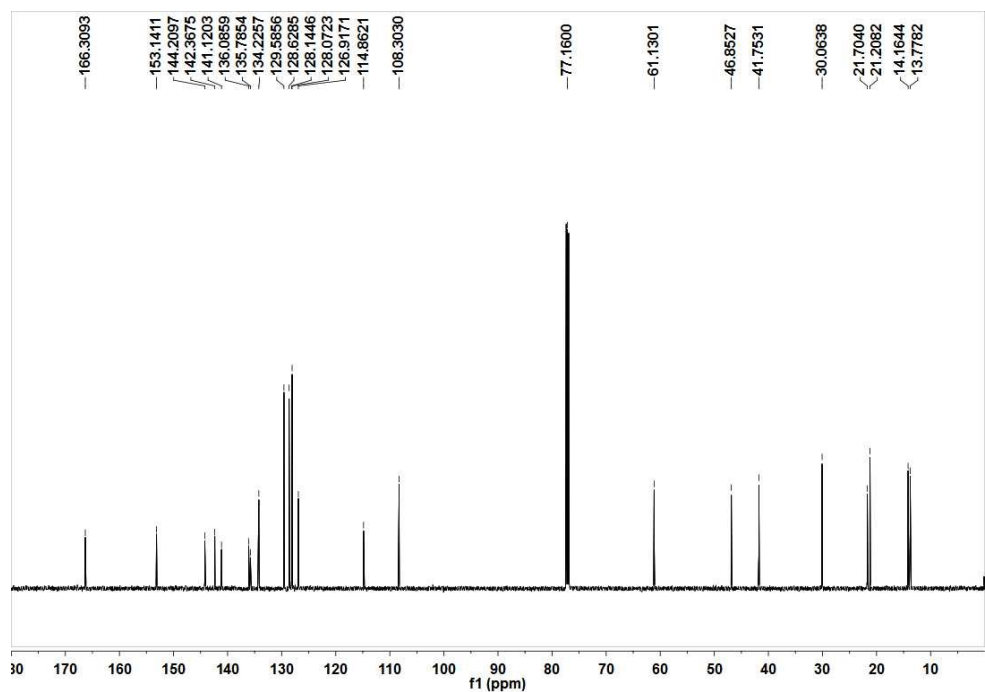

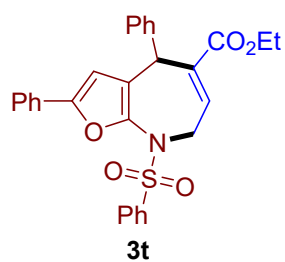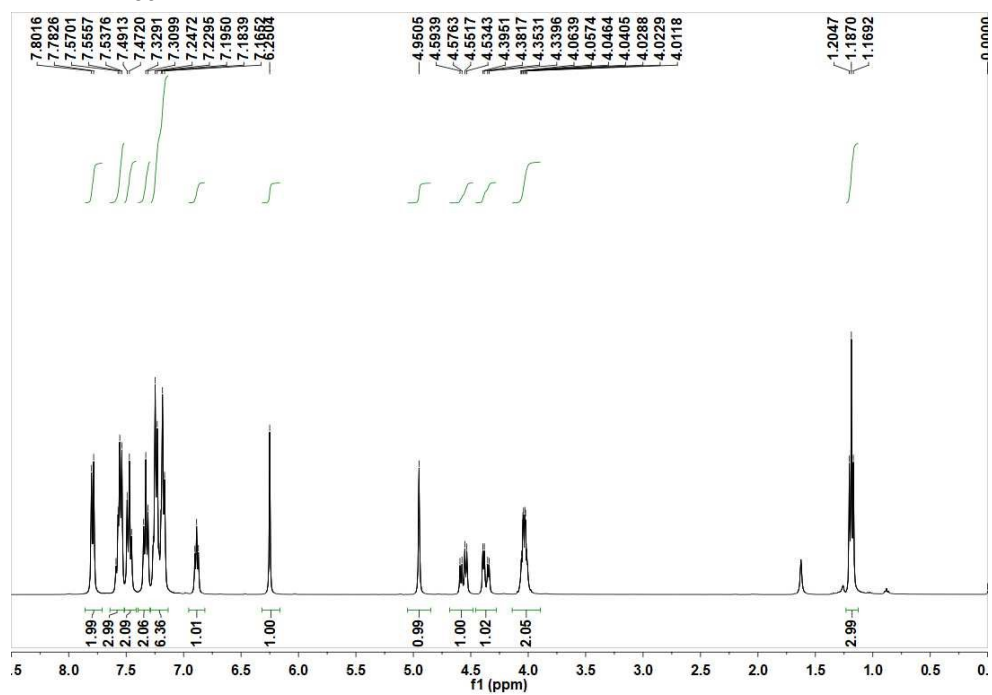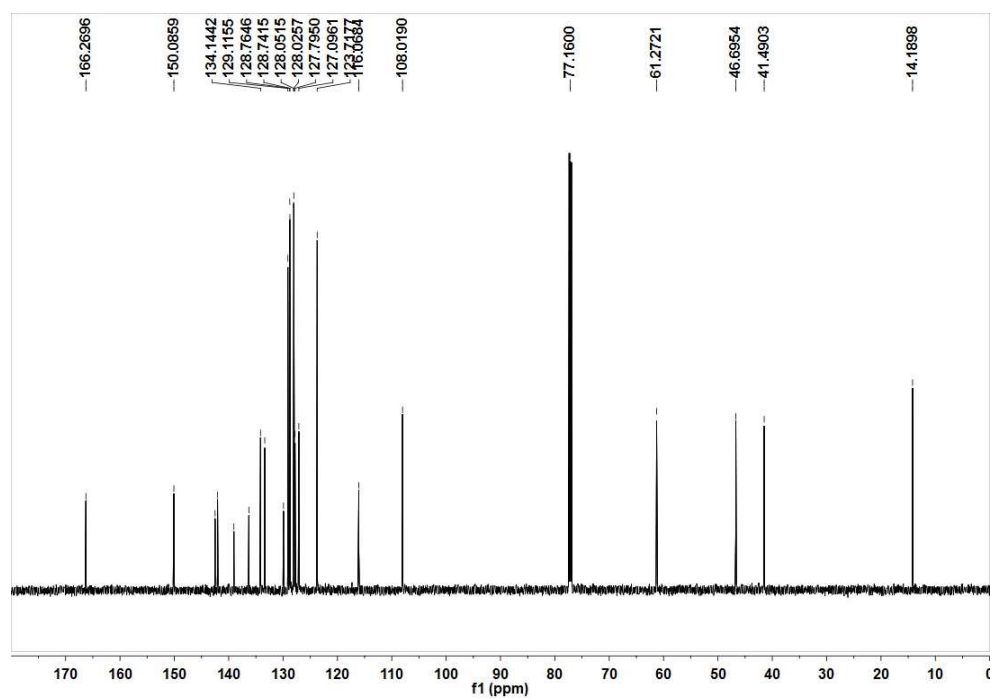

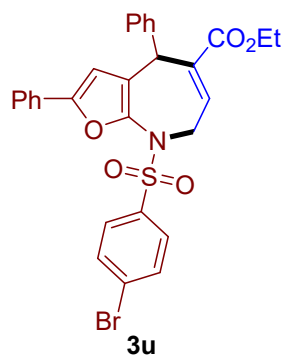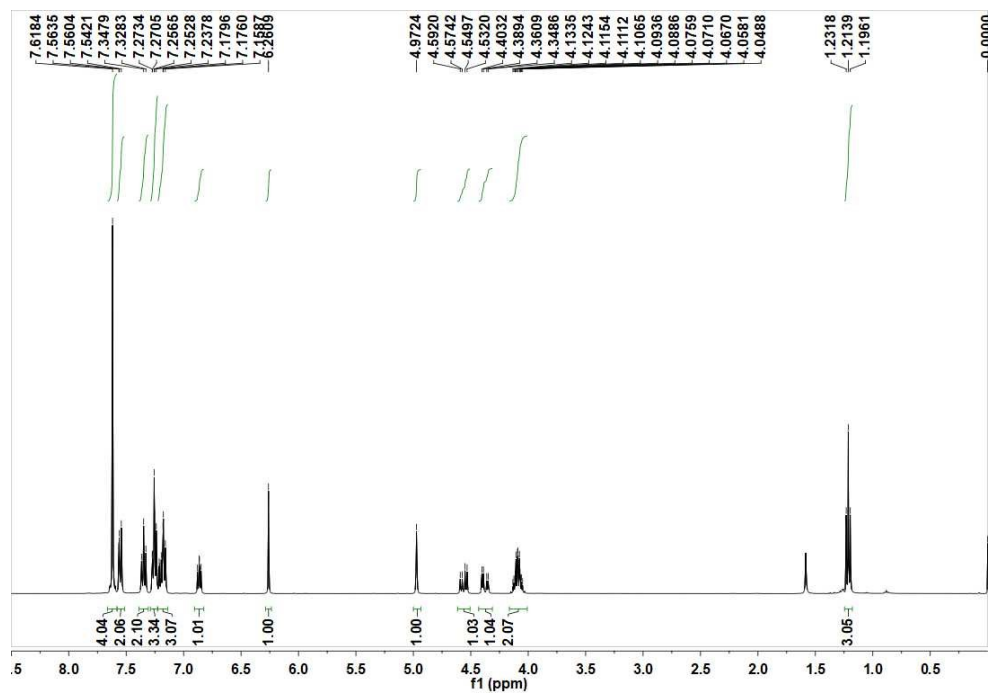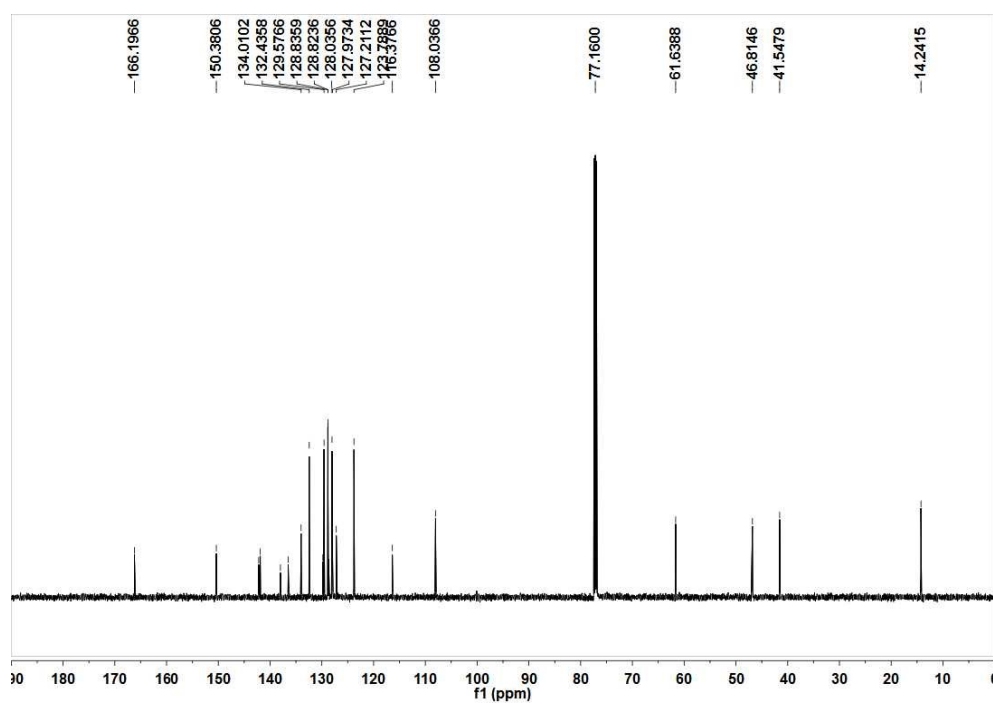

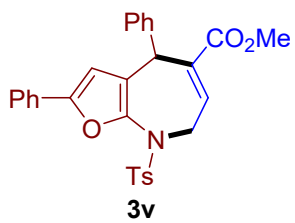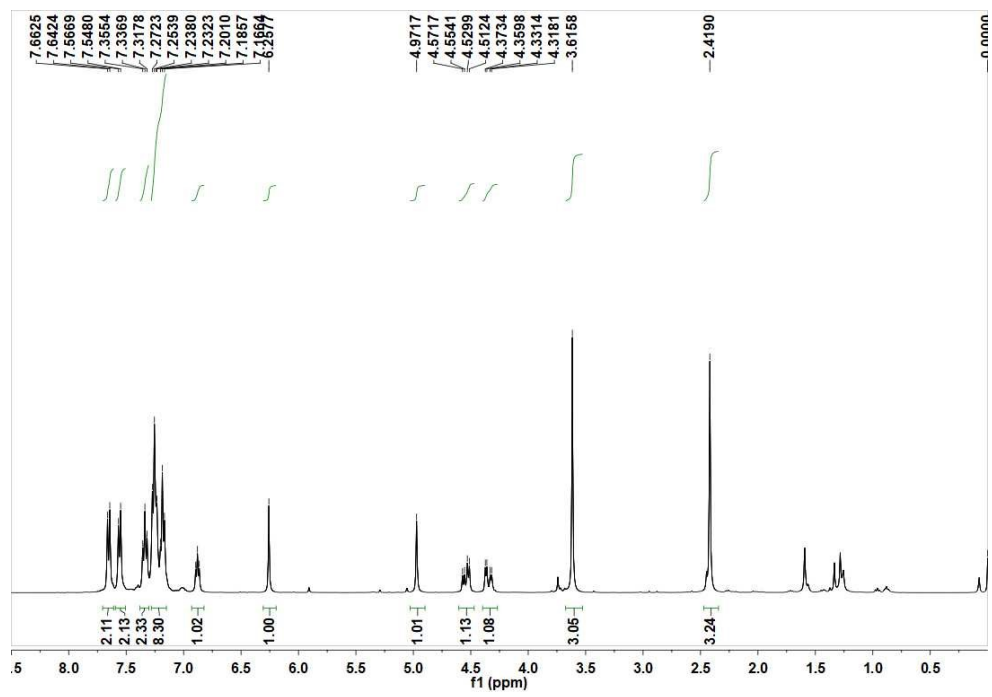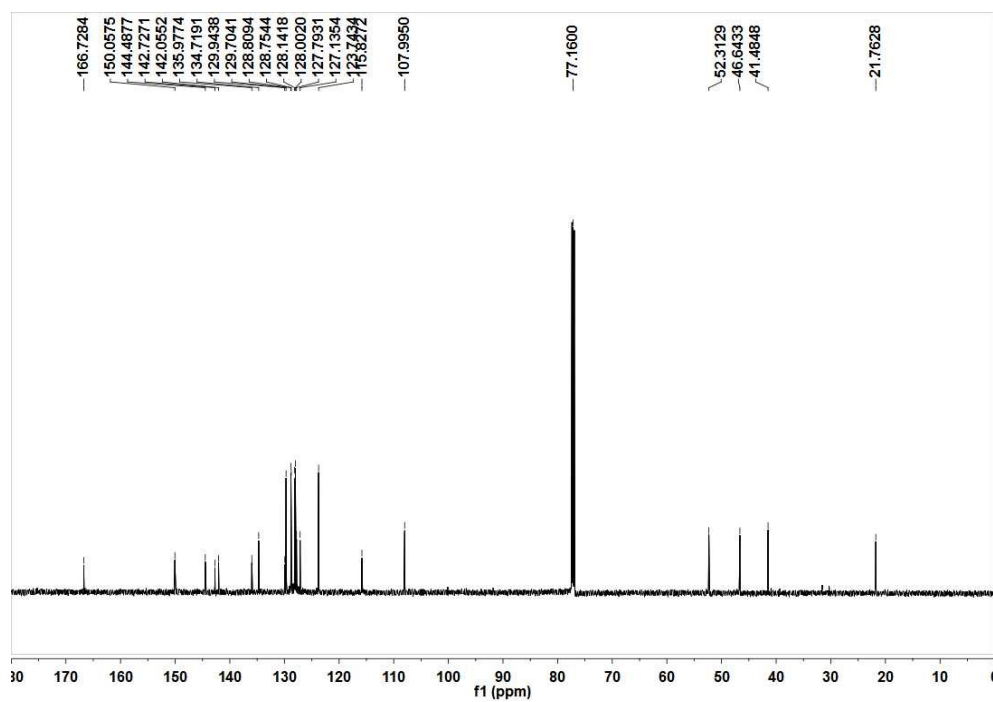

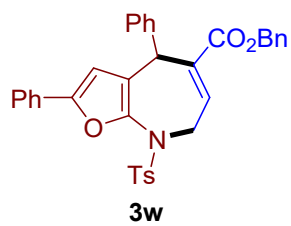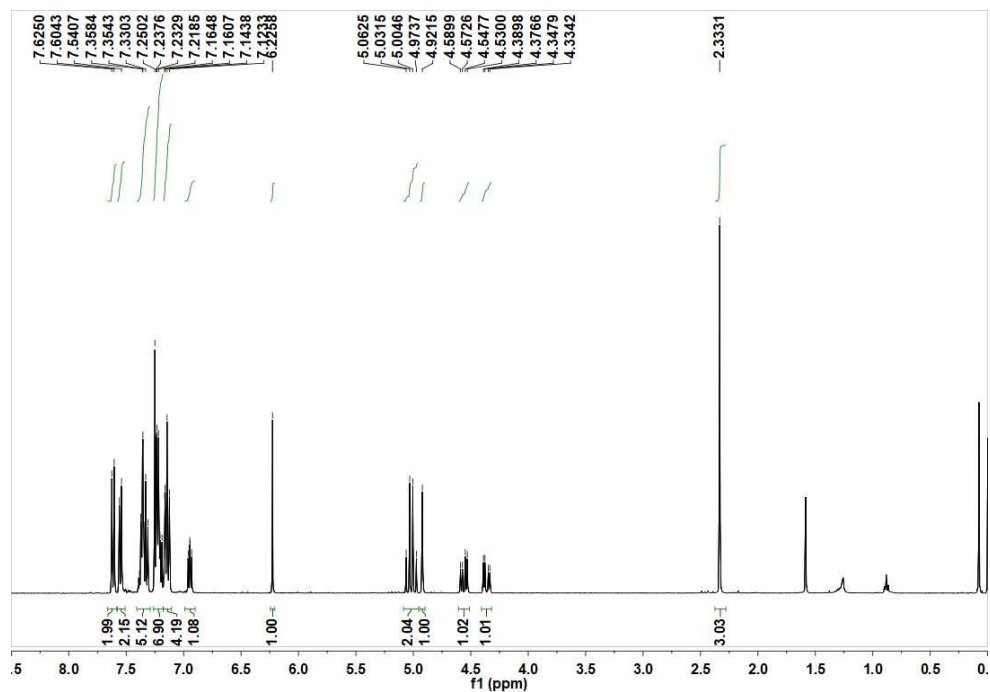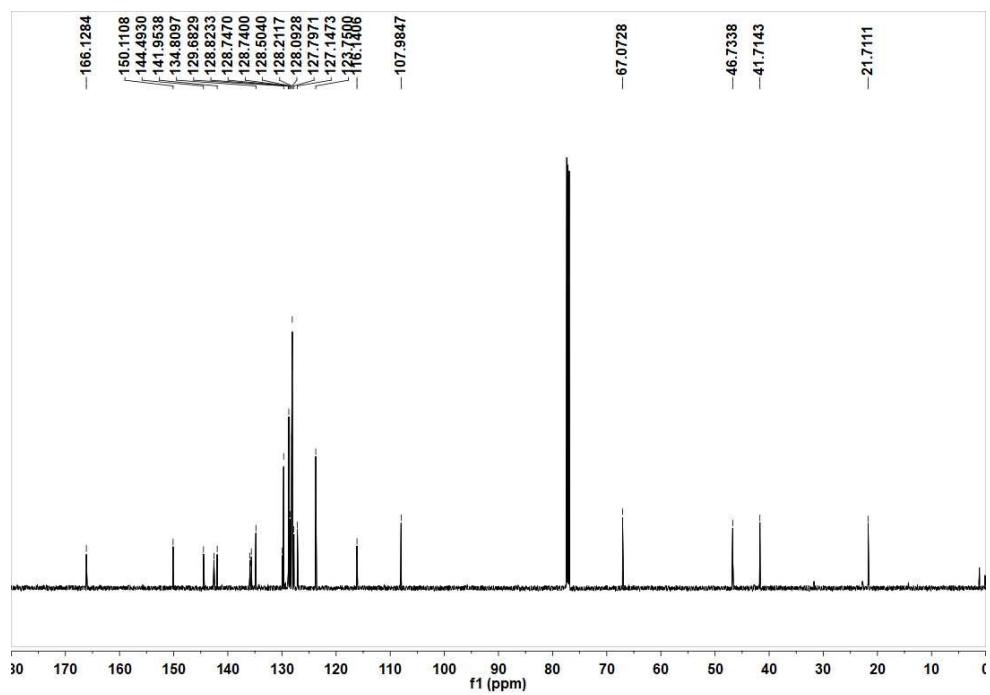

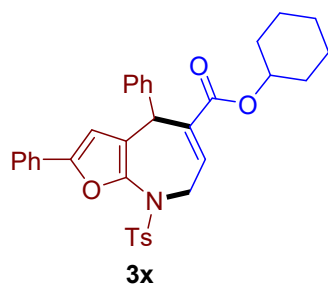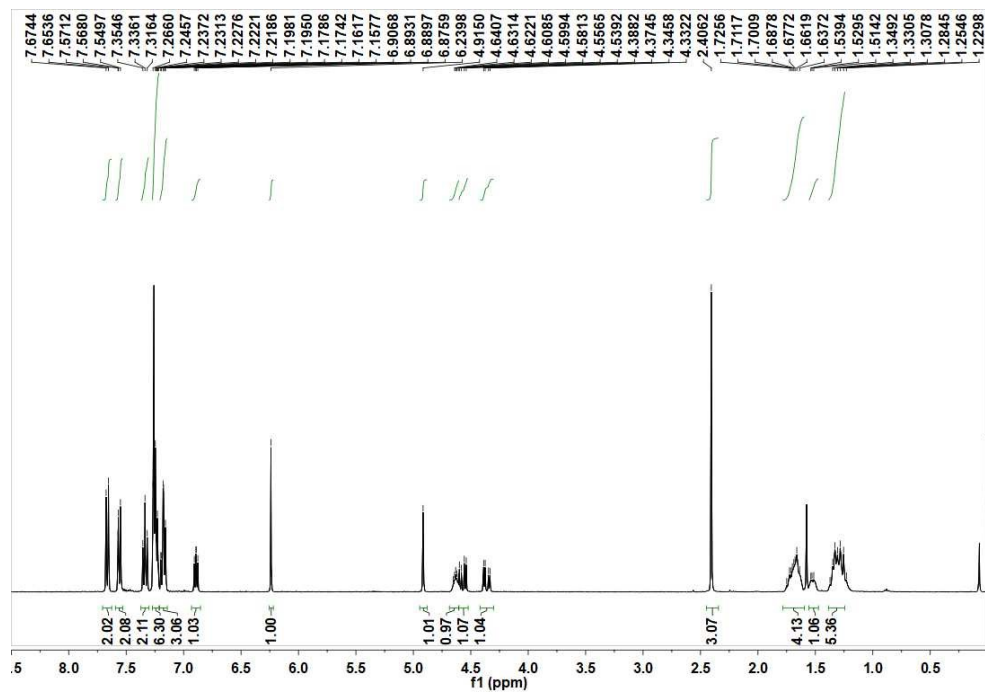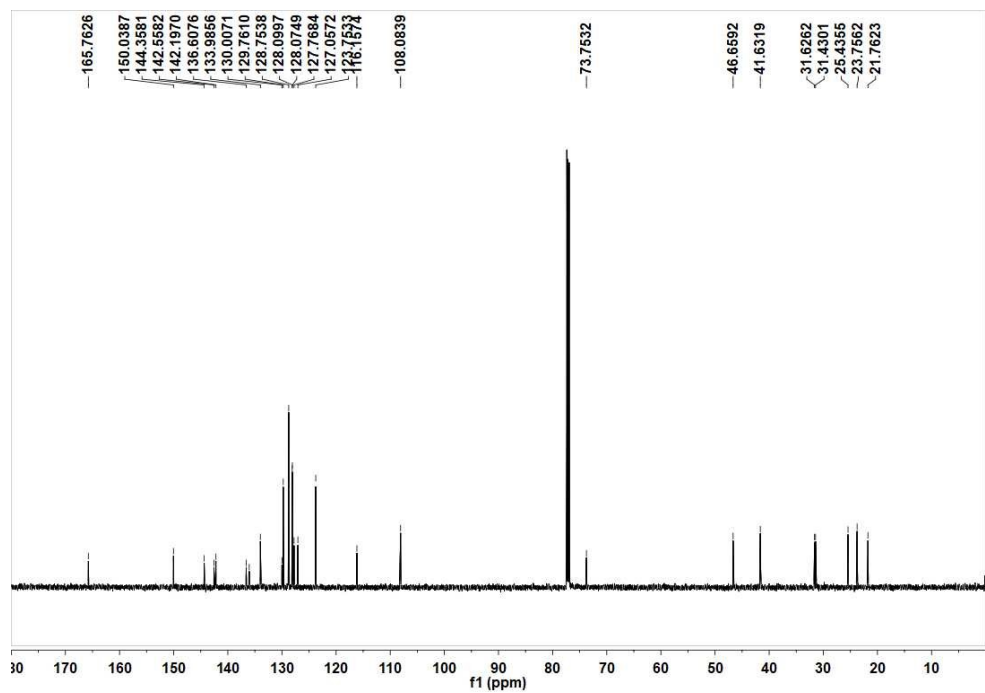



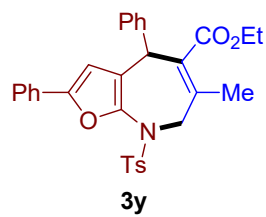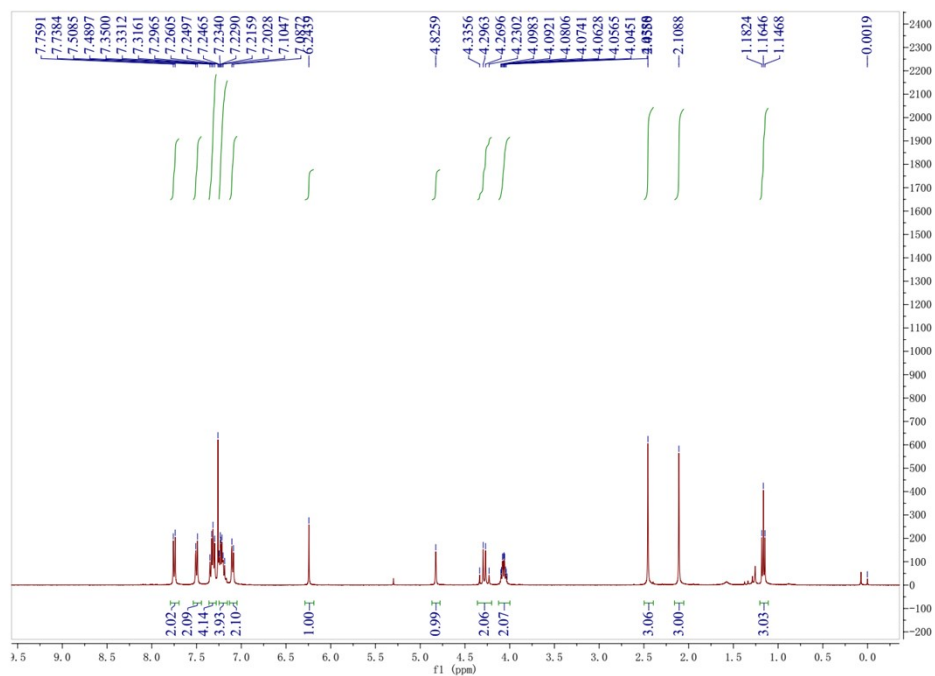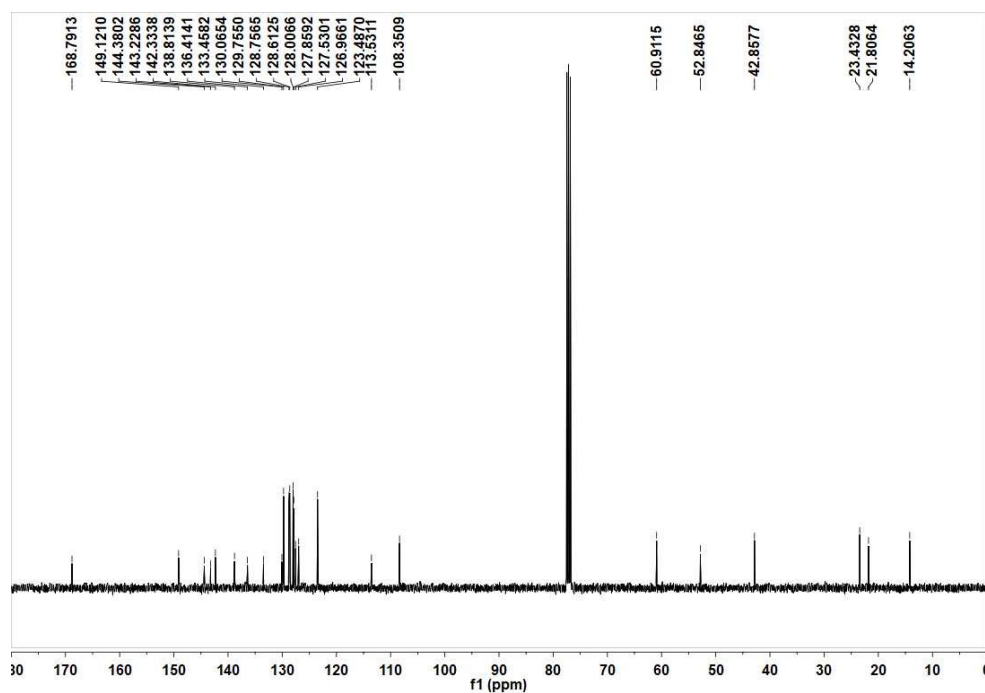

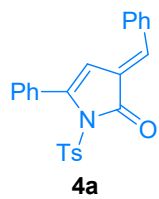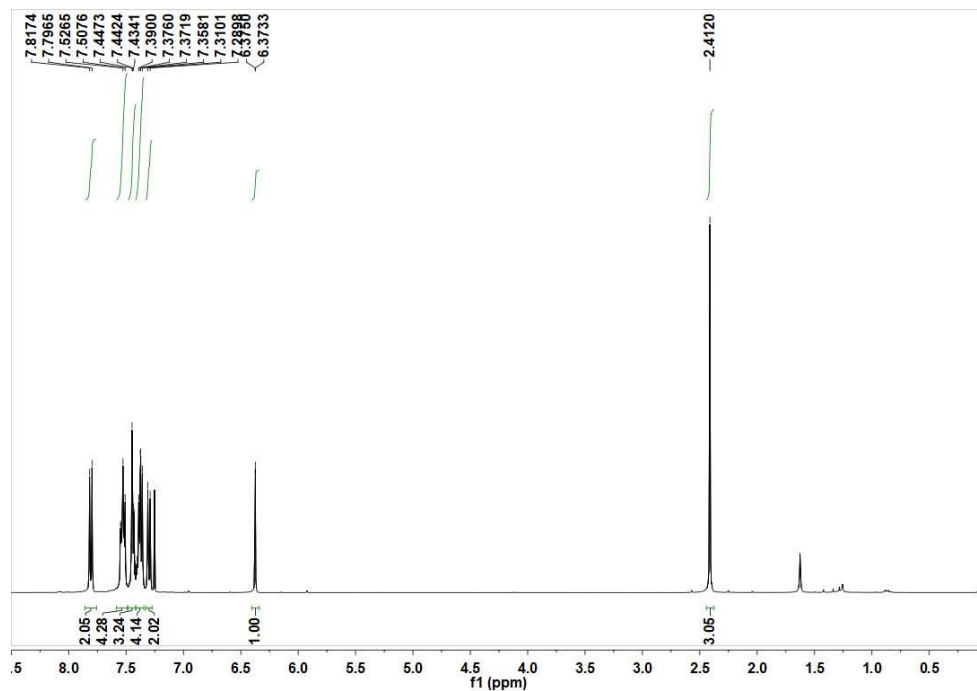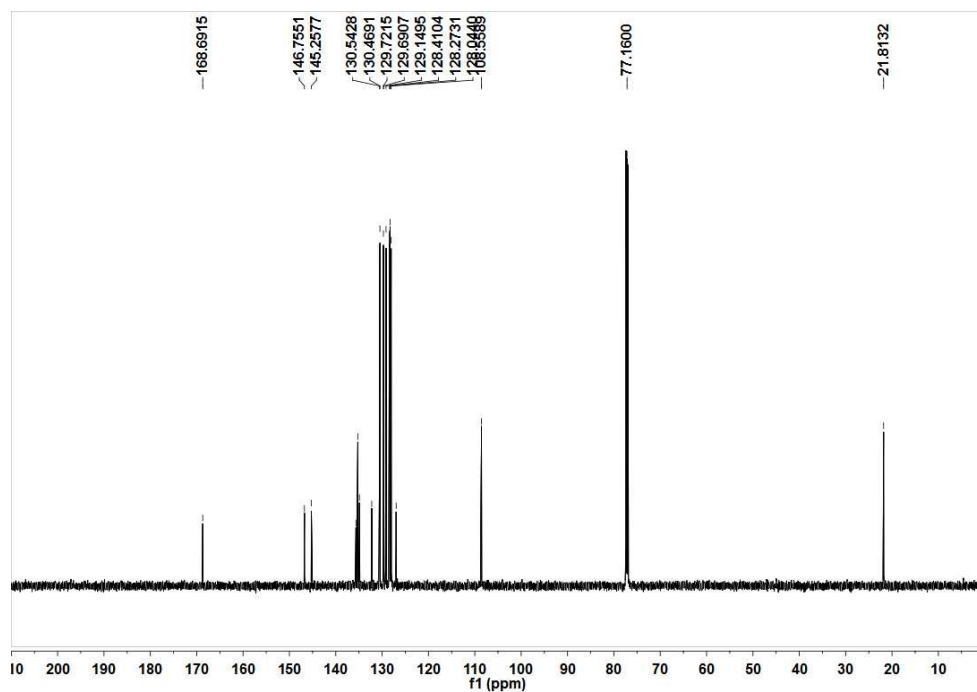

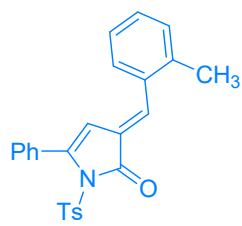

**4b**

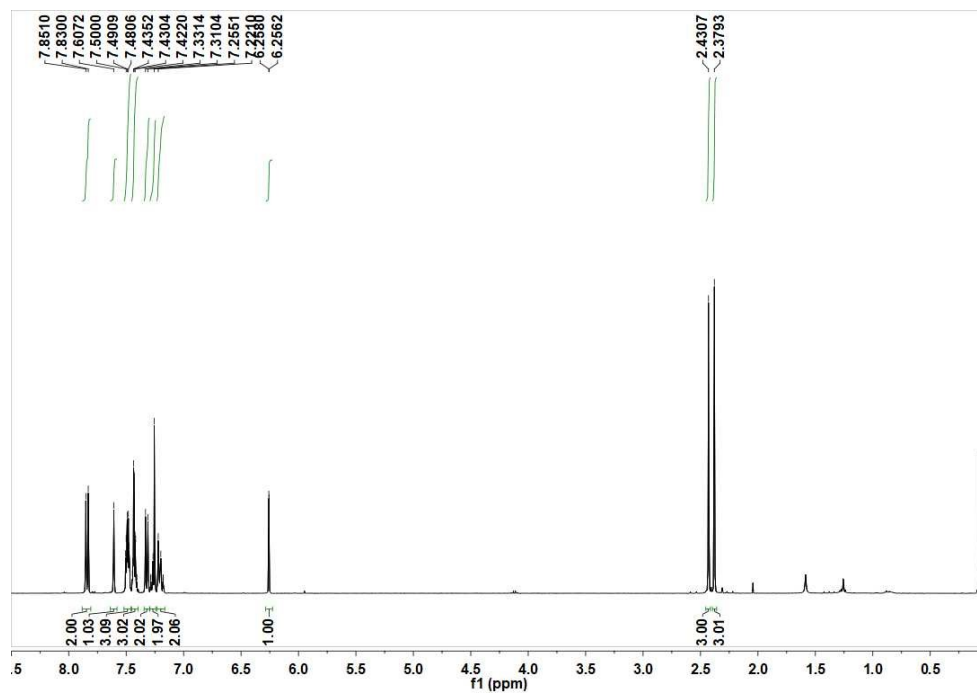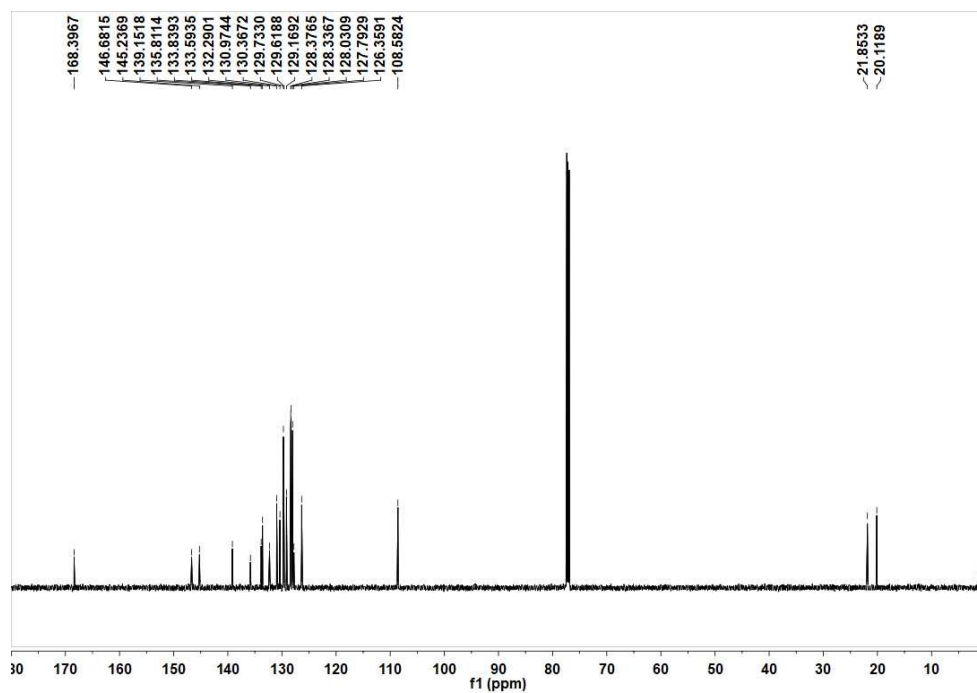

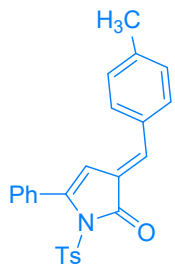

4c

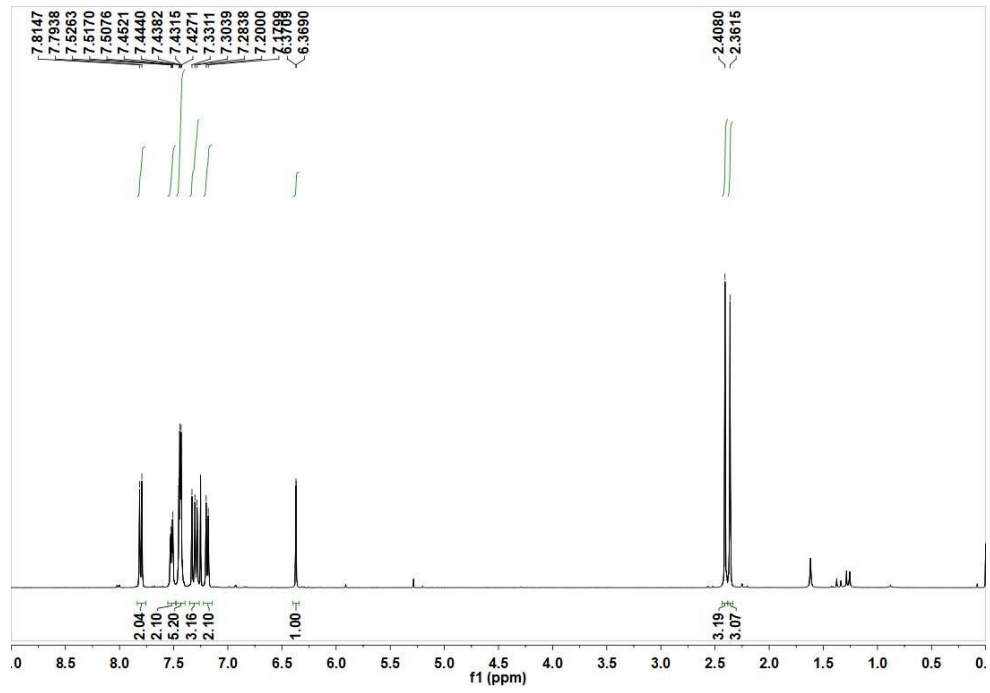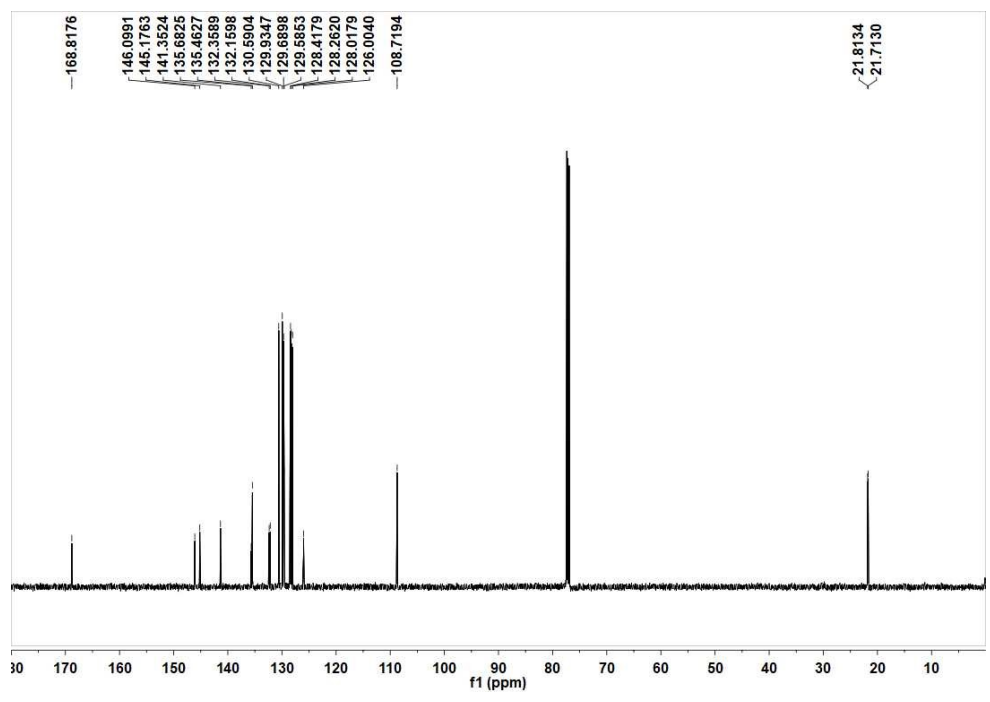

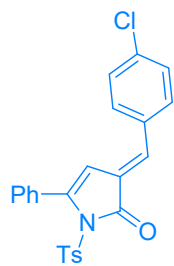

4d

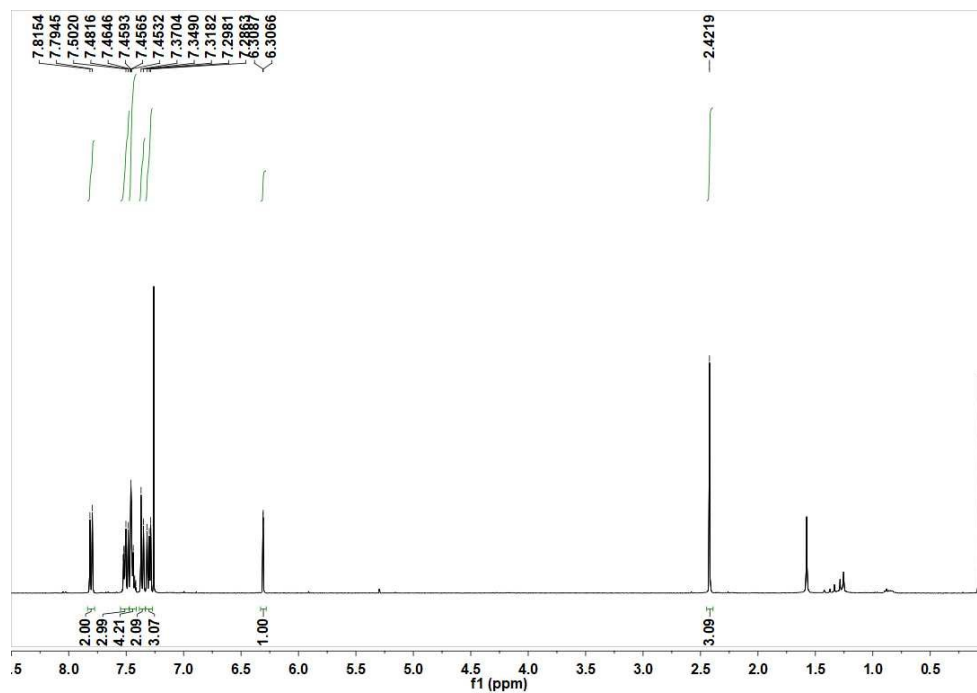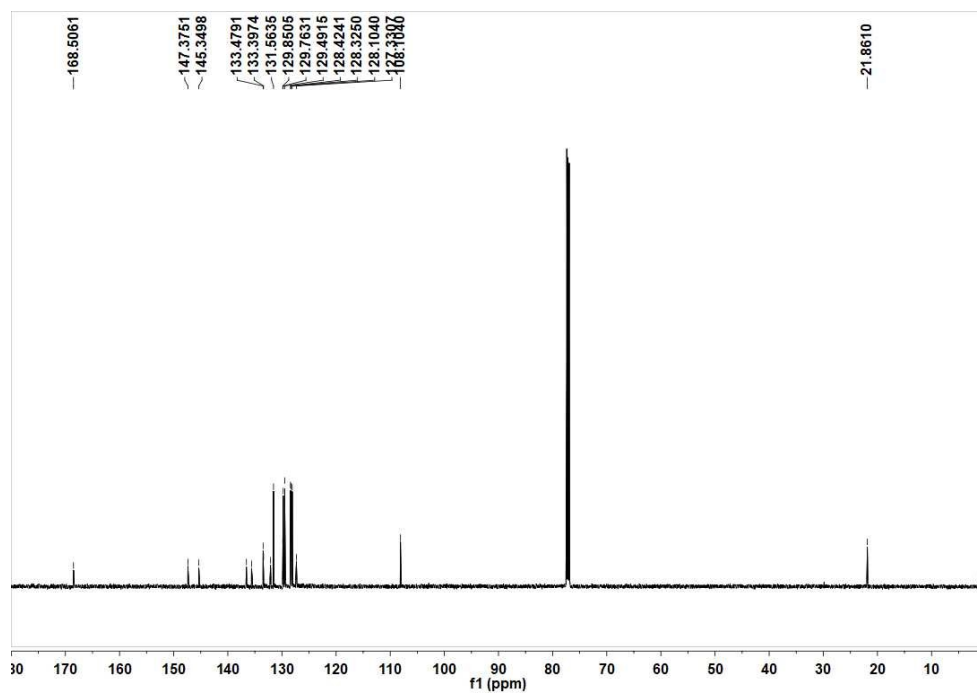

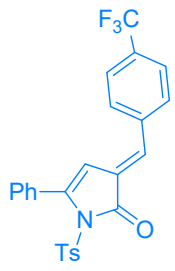

**4e**

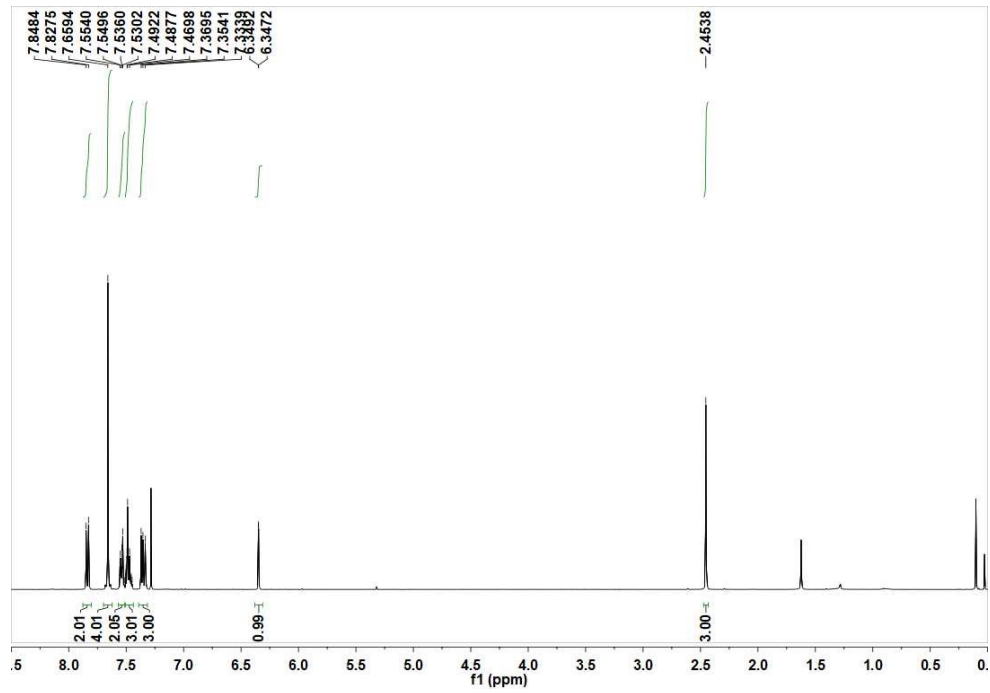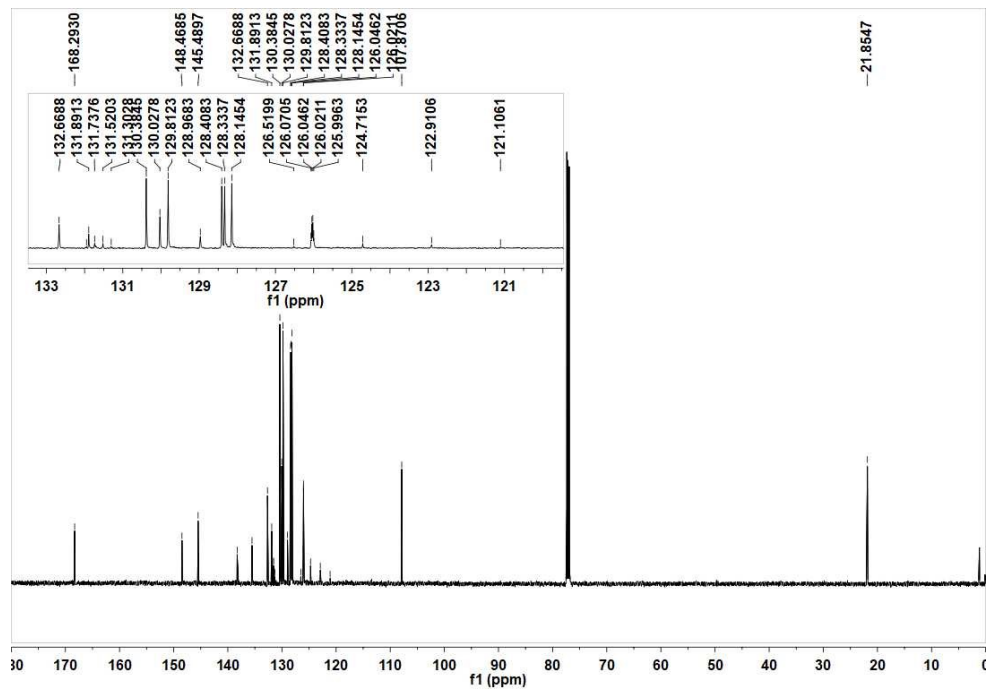

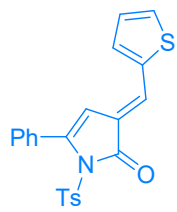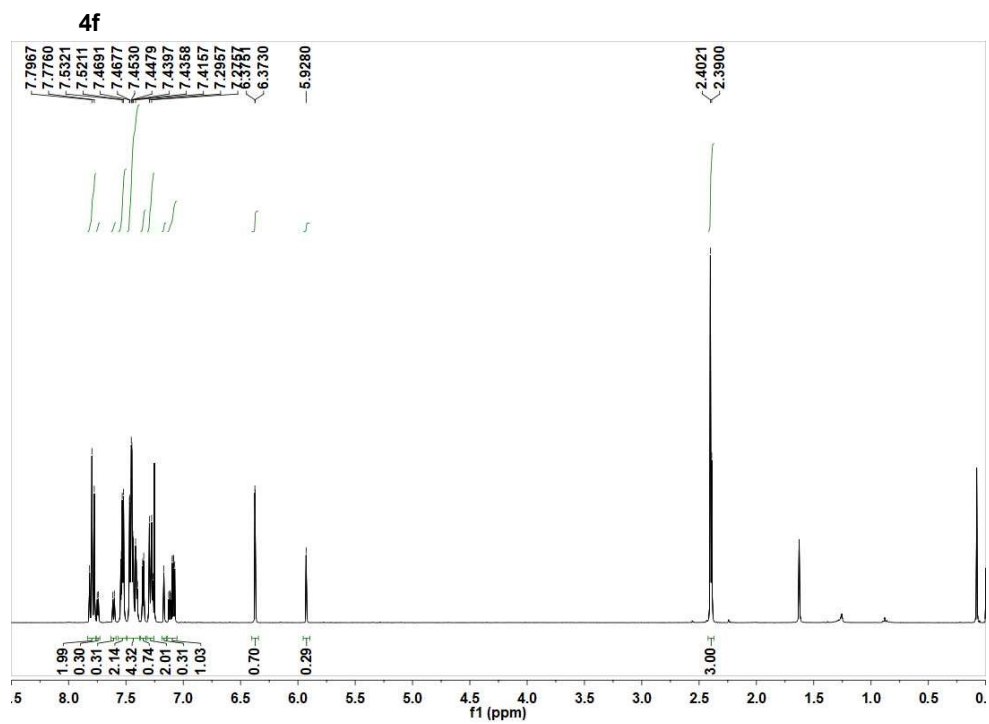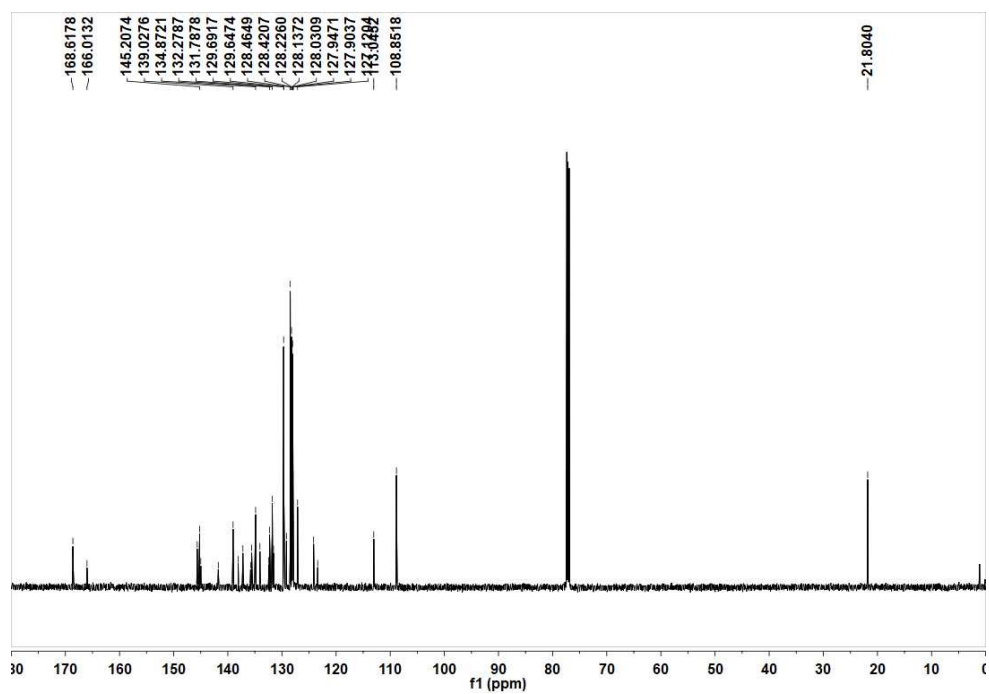

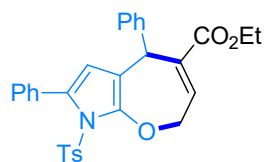

5a

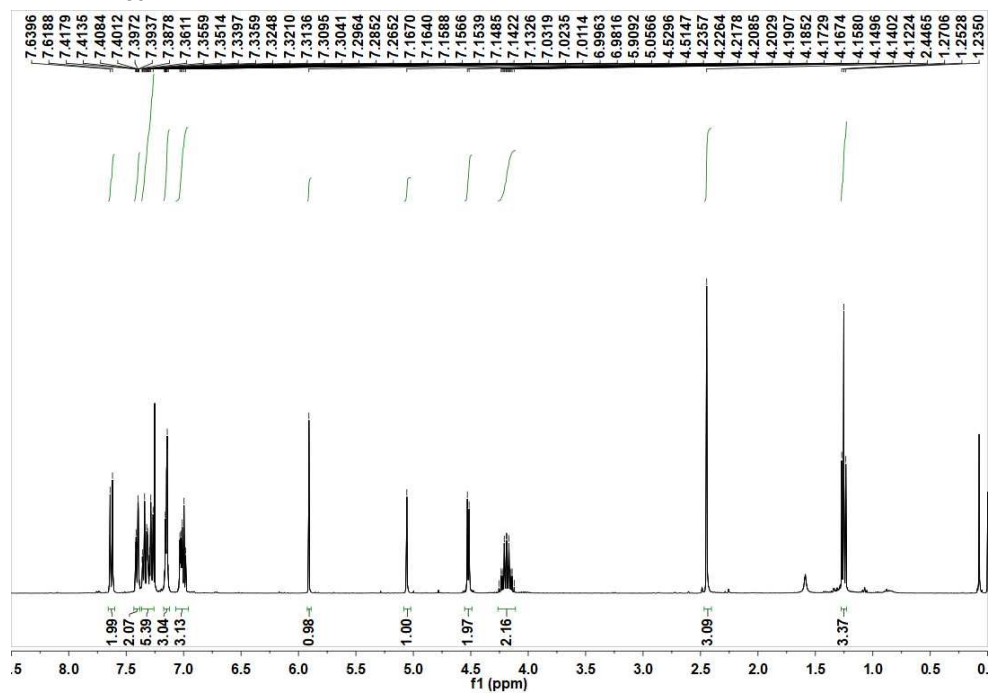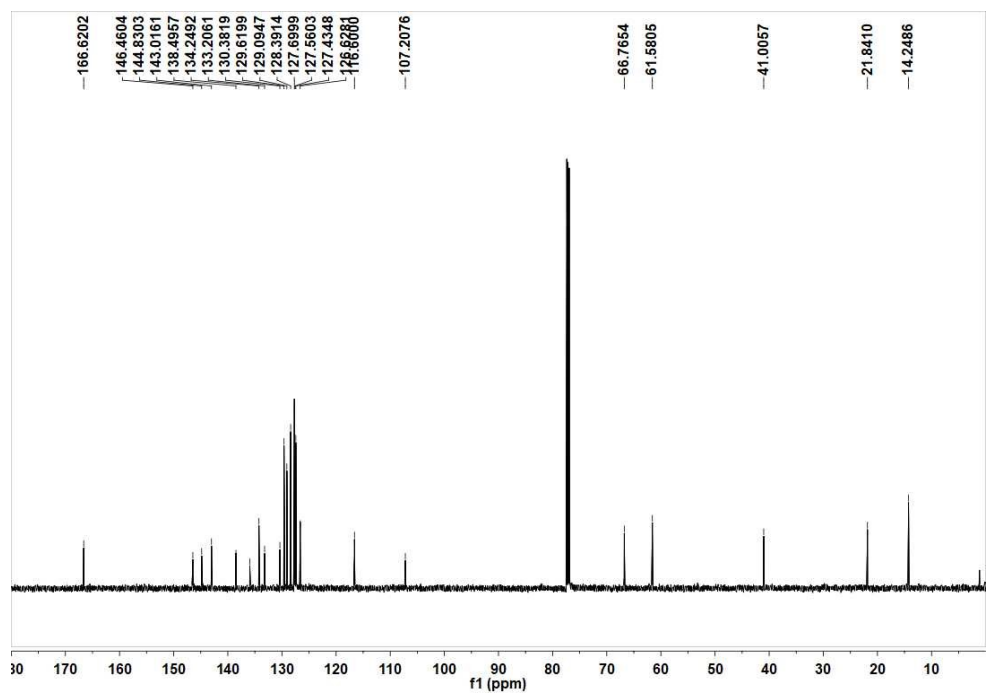



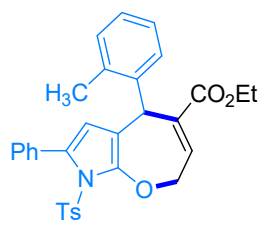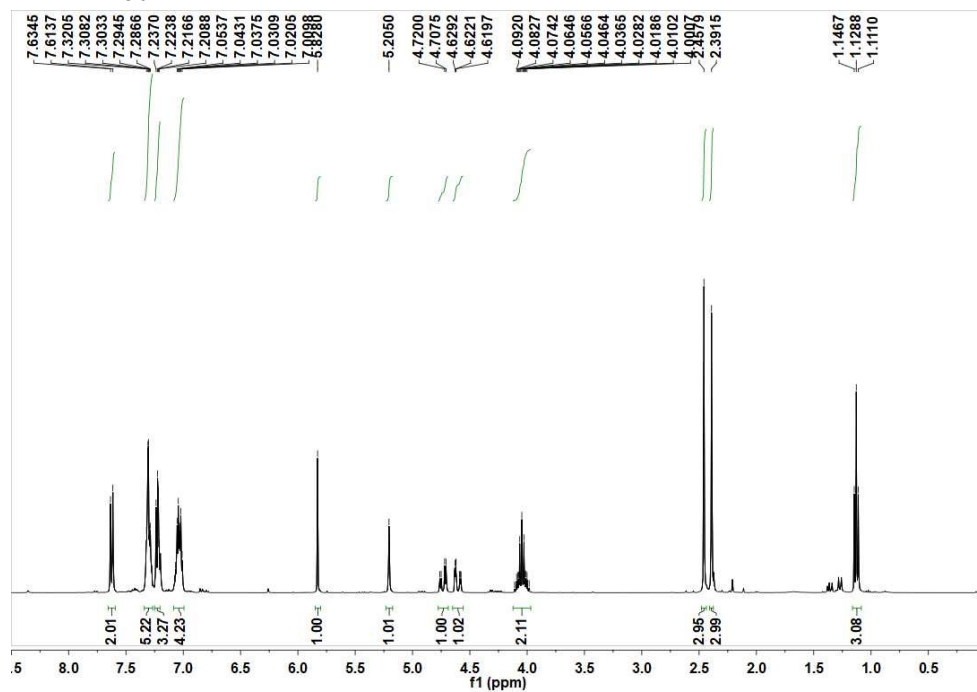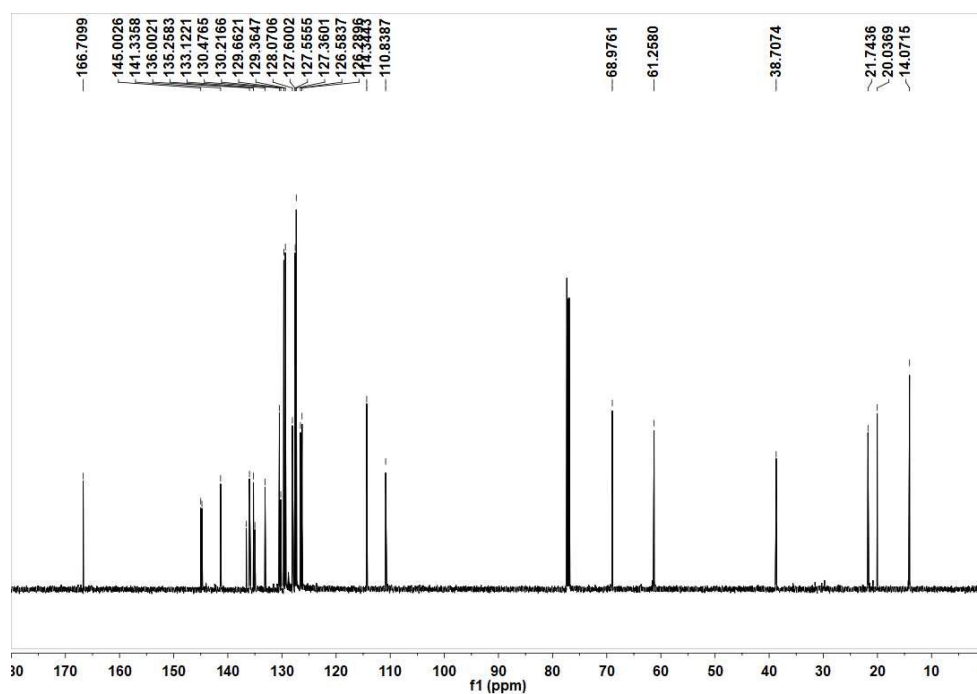

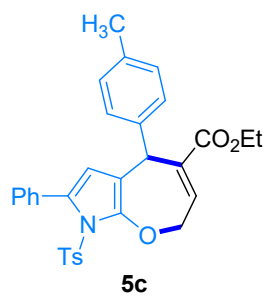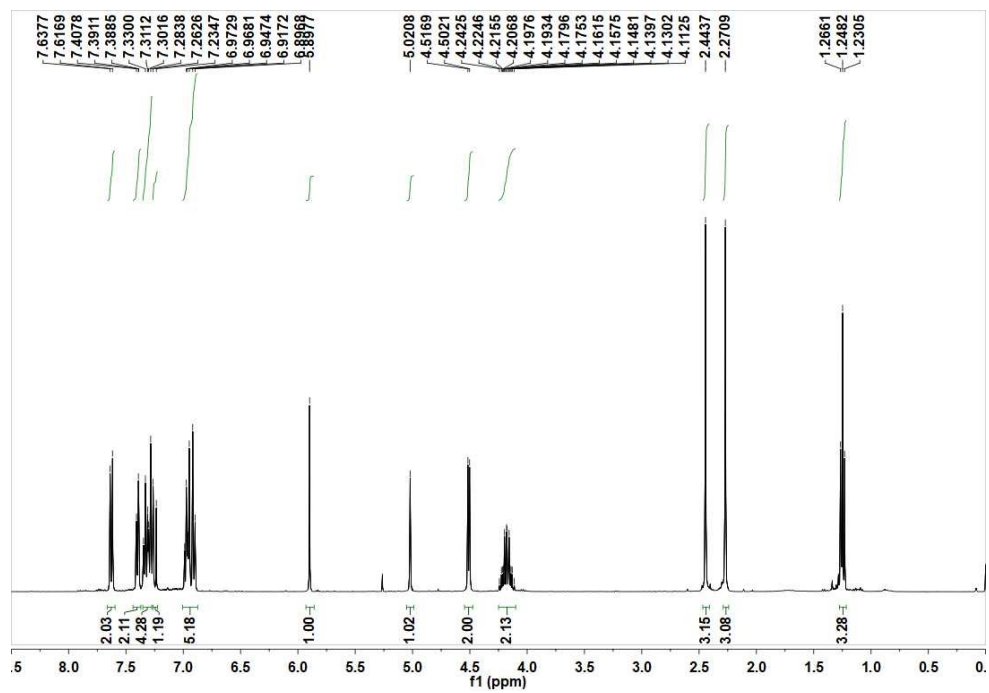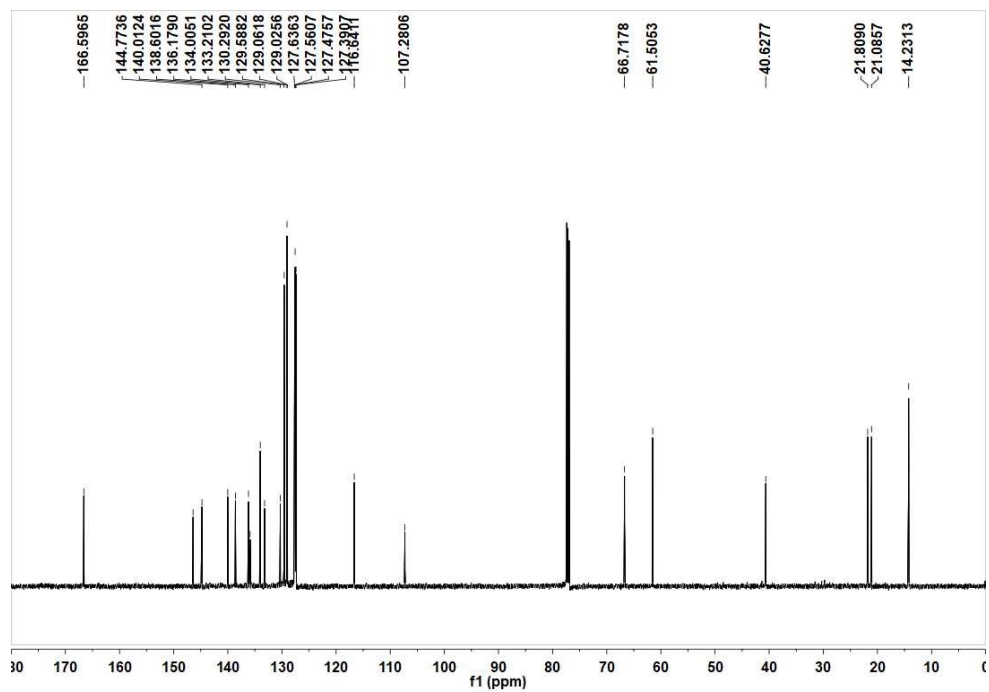

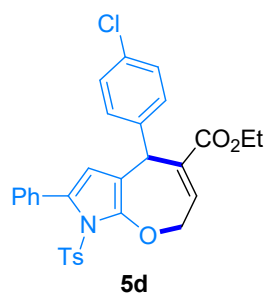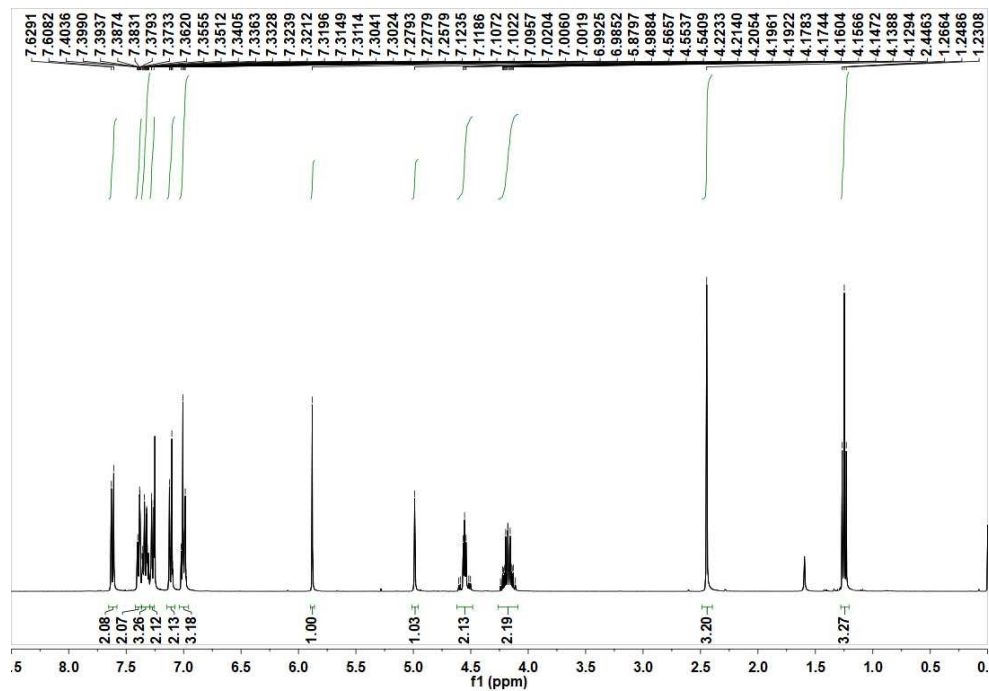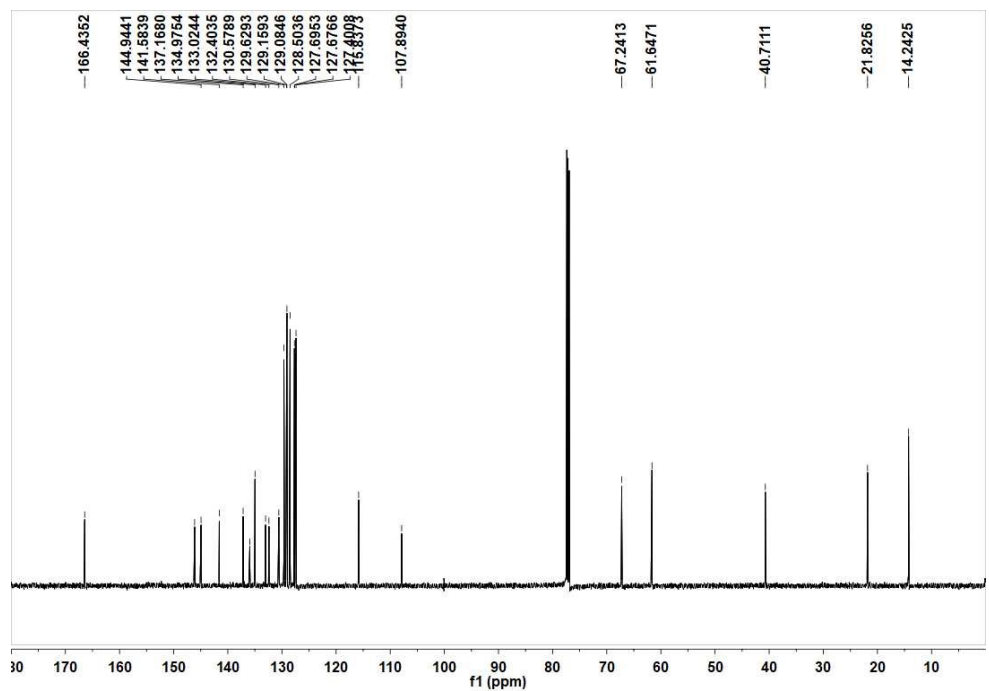

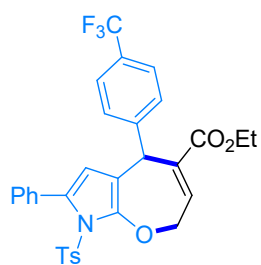

**5e**

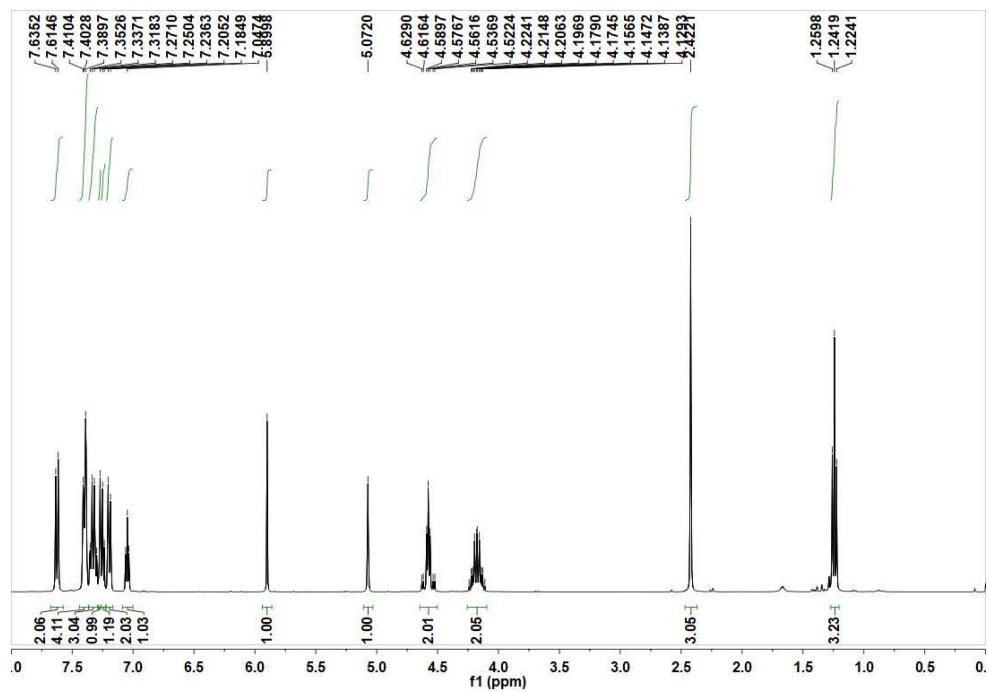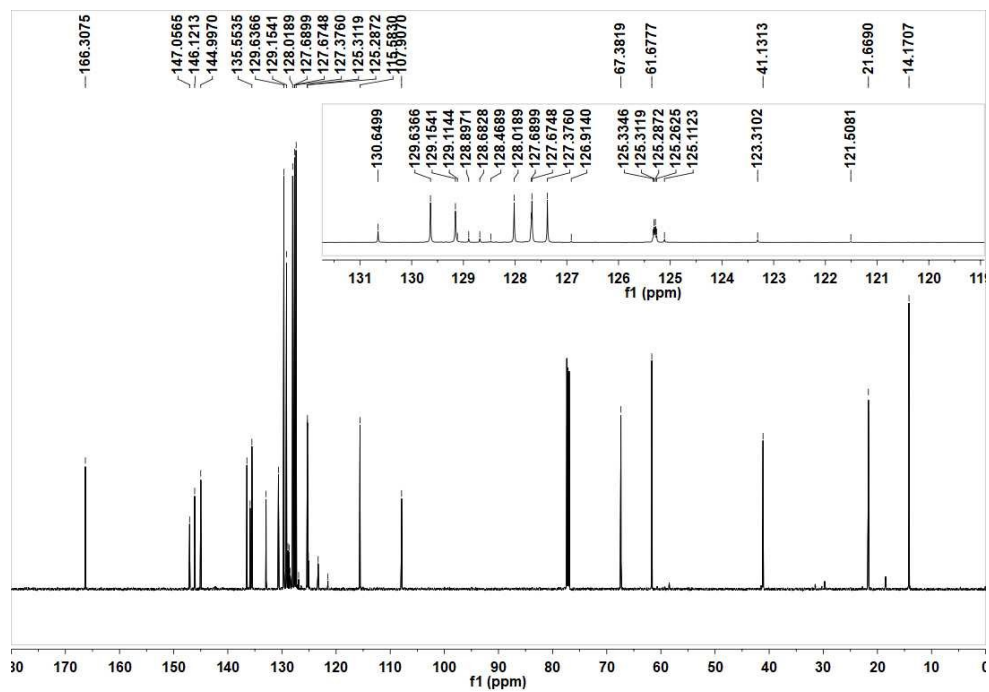

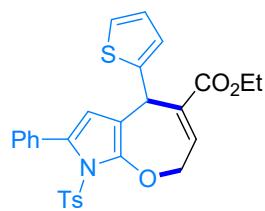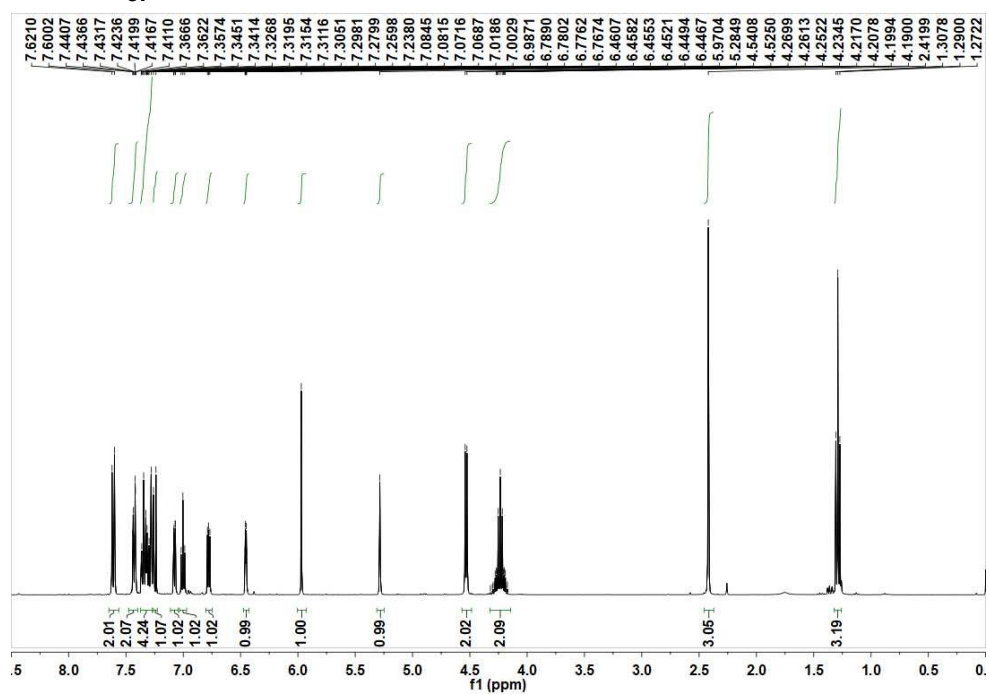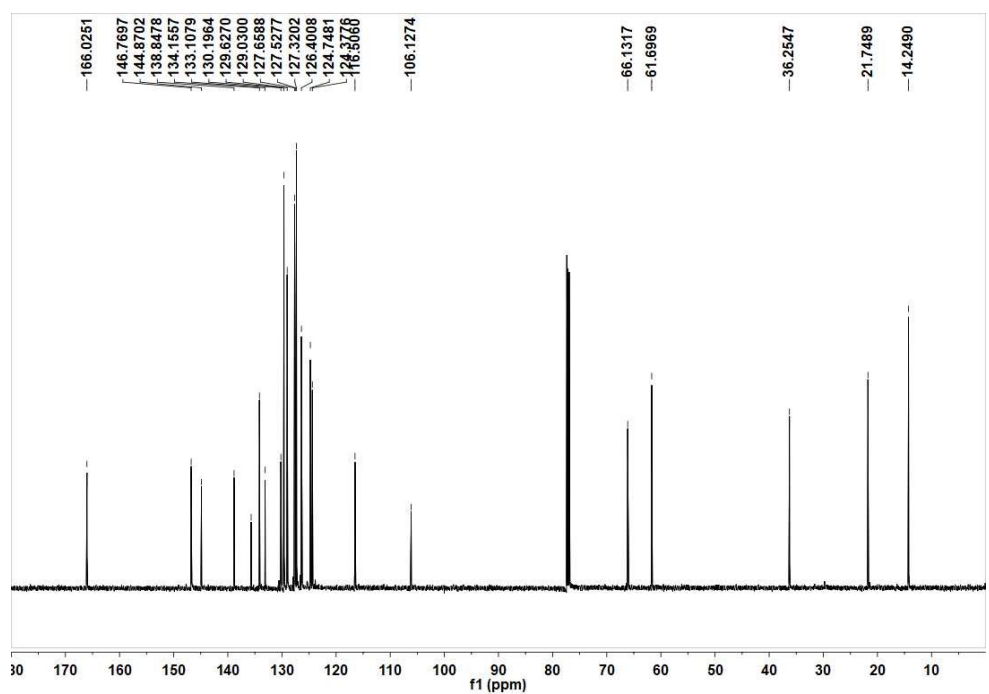

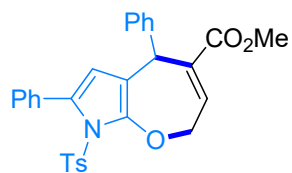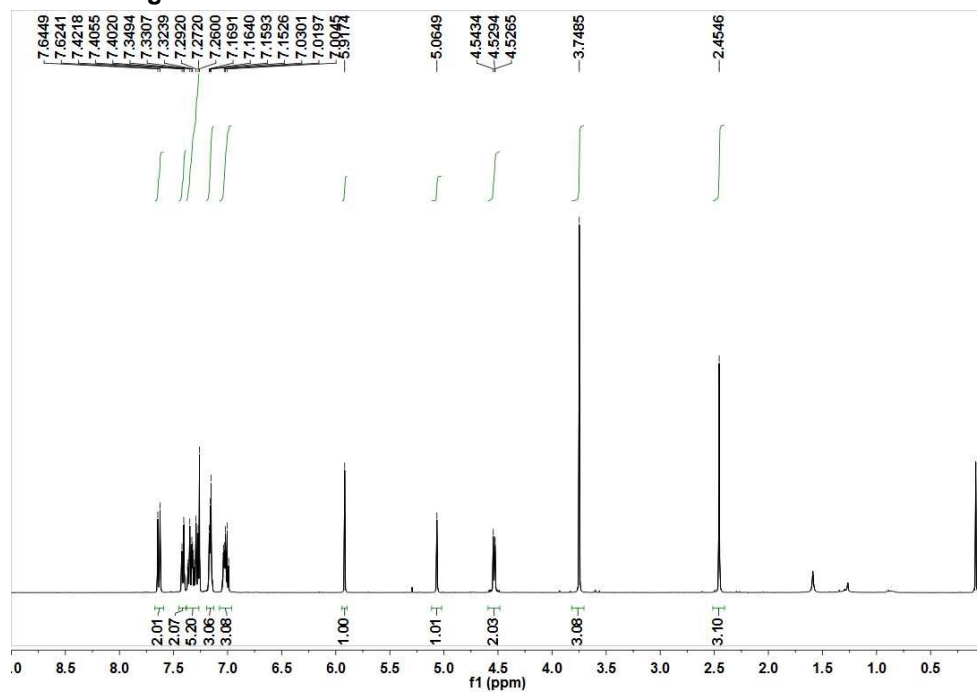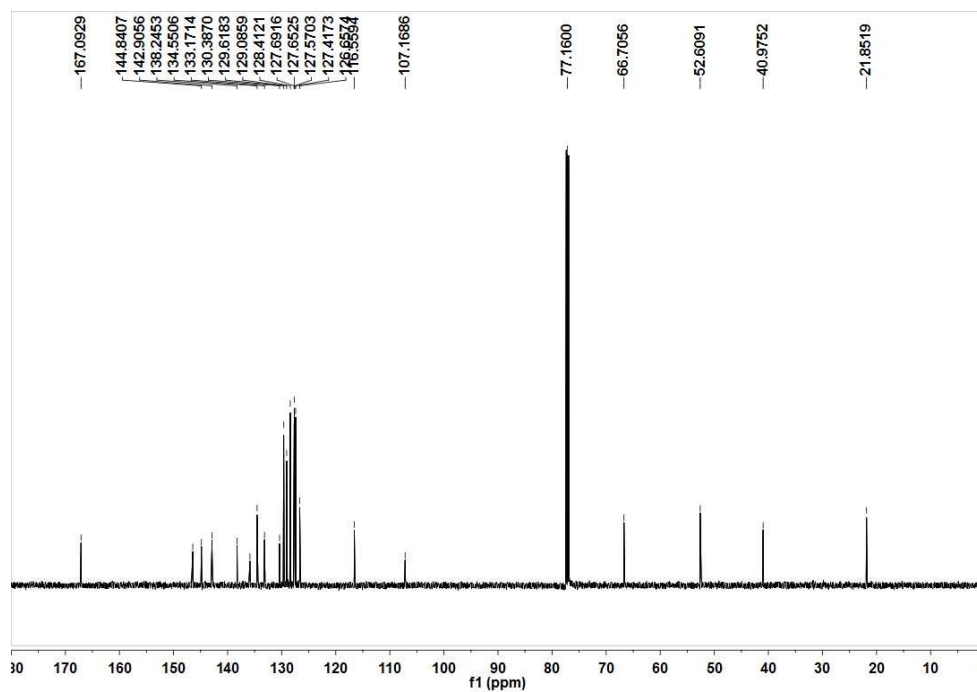

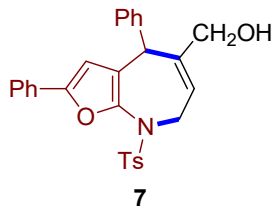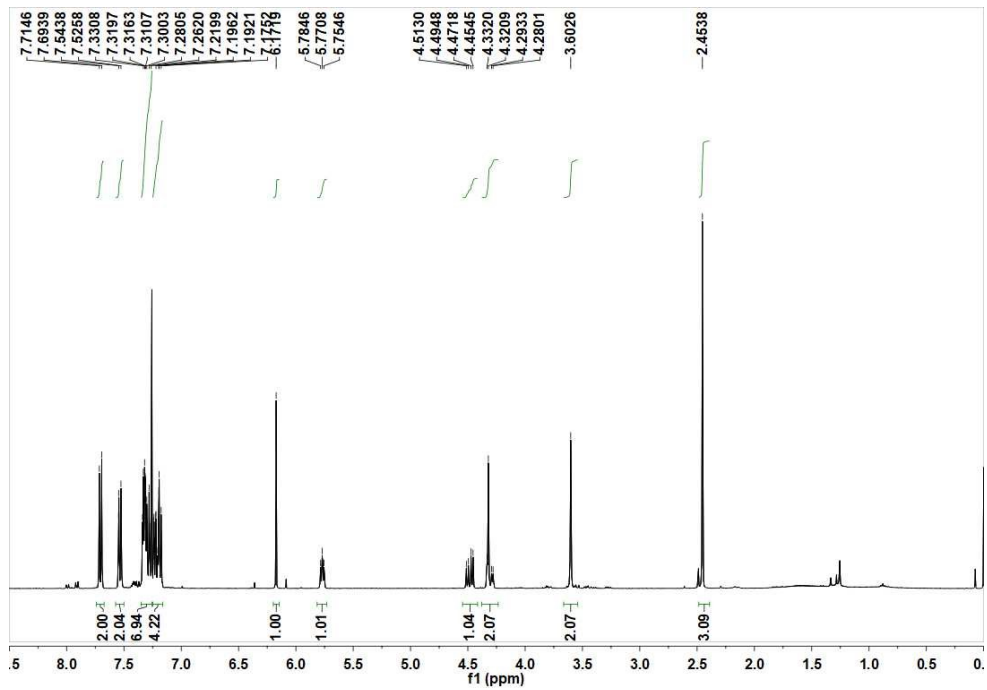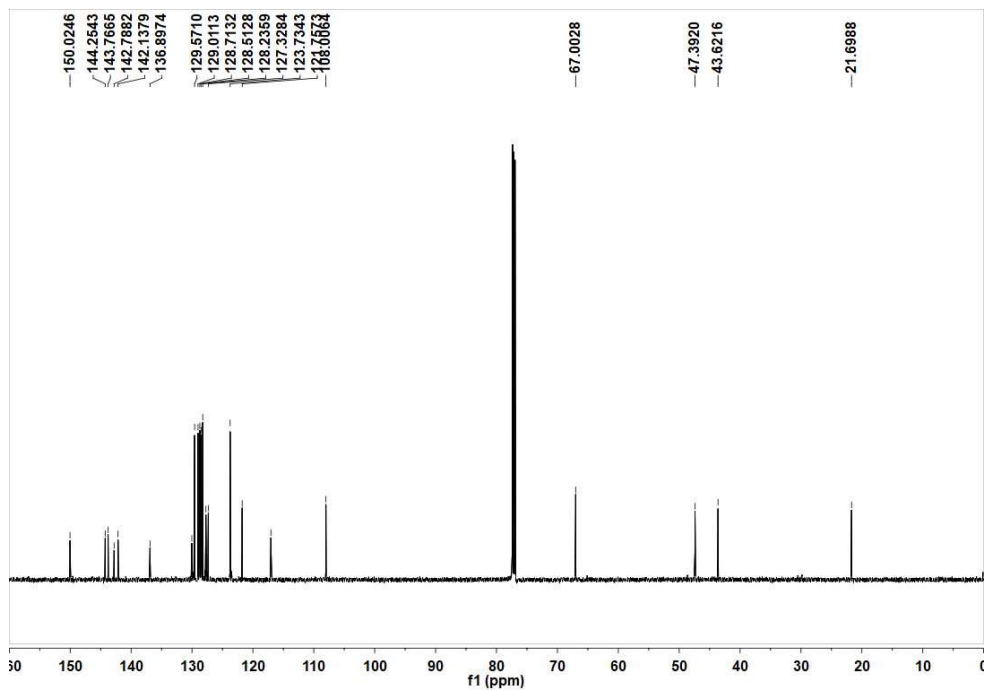

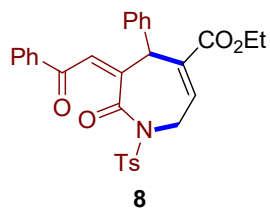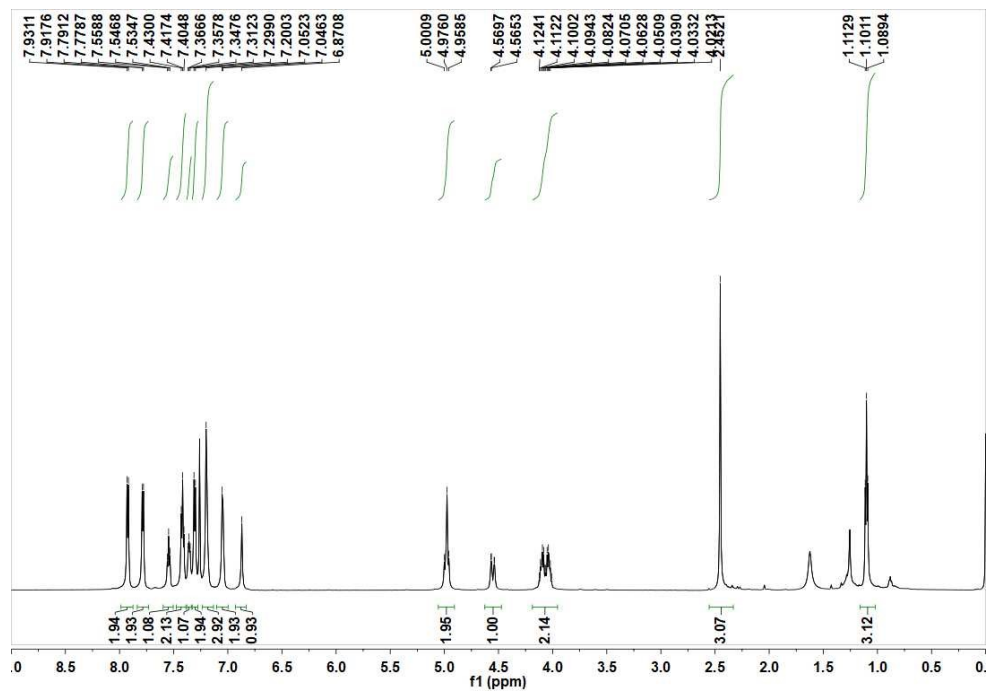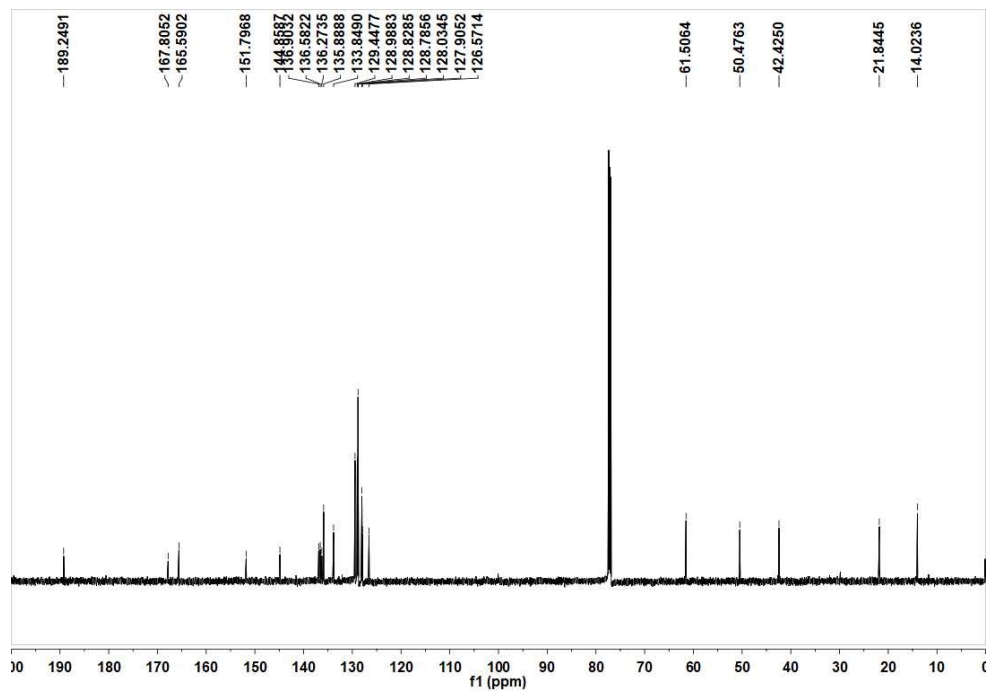



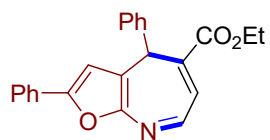

9

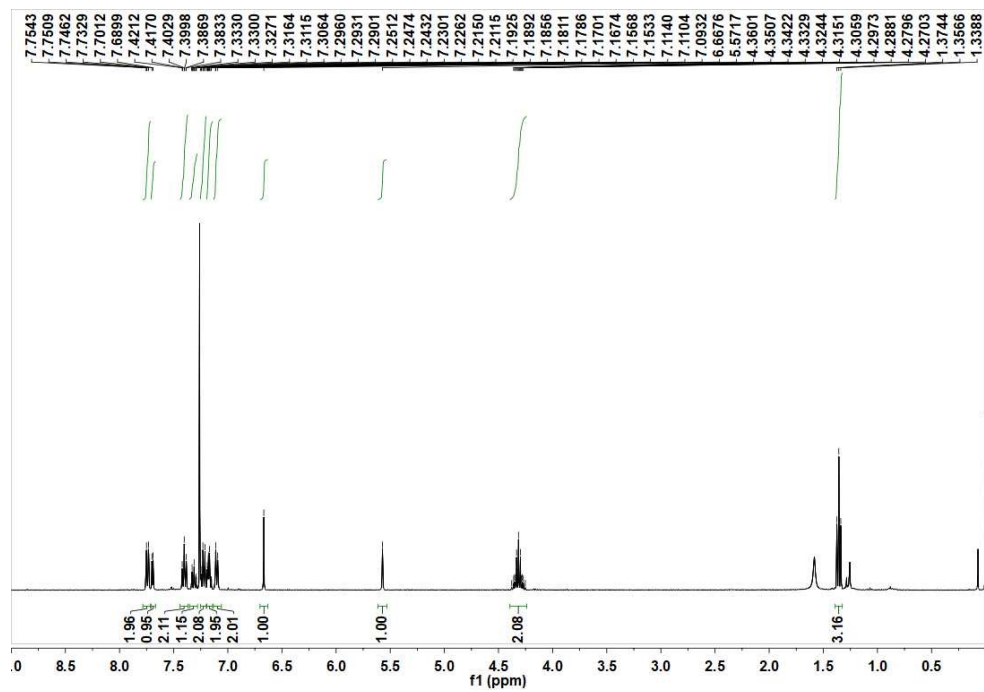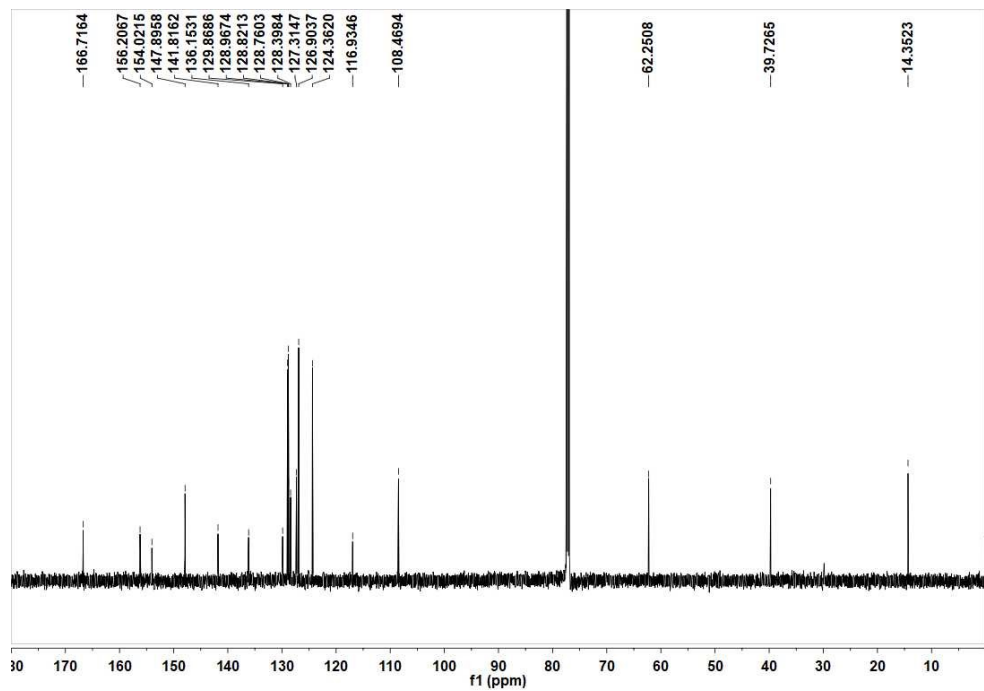

## HPLC Spectra of 3a

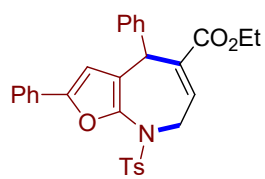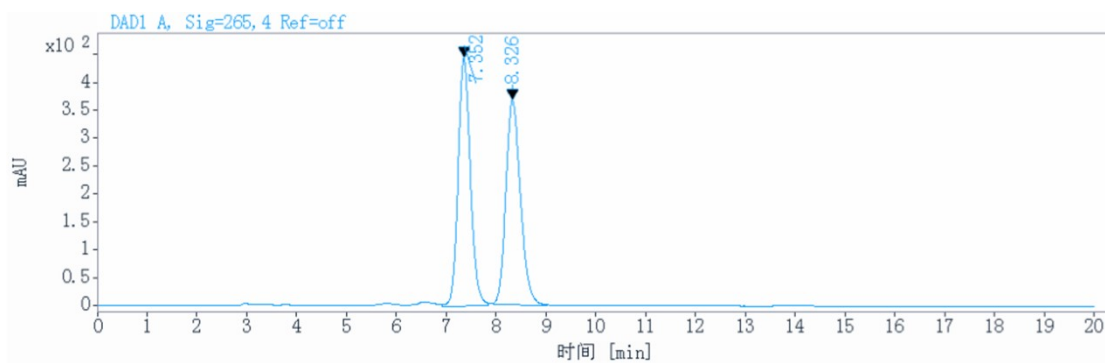

信号: DAD1 A, Sig=265, 4 Ref=off

| RT    | Area       | Height   | Area%   | Height% |
|-------|------------|----------|---------|---------|
| 7.352 | 7707.9668  | 445.9473 | 50.5795 | 54.88   |
| 8.326 | 7531.3530  | 366.6086 | 49.4205 | 45.12   |
|       | 15239.3198 |          |         |         |

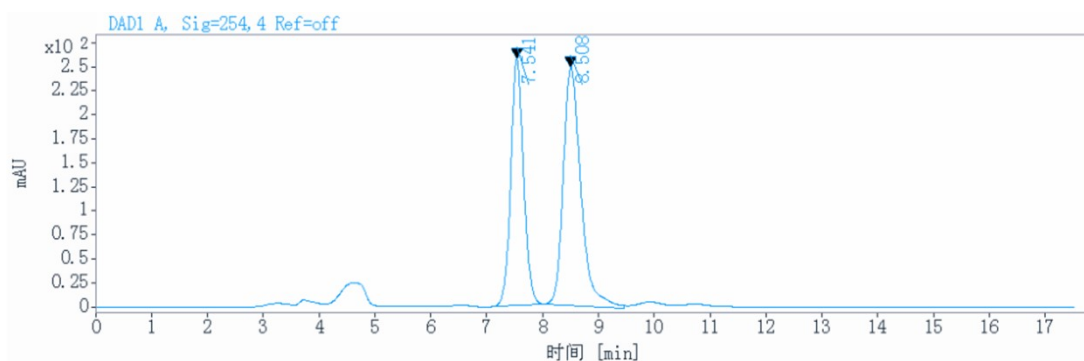

信号: DAD1 A, Sig=254, 4 Ref=off

| RT    | Area      | Height   | Area%   | Height% |
|-------|-----------|----------|---------|---------|
| 7.541 | 4064.0498 | 256.3556 | 42.7953 | 50.81   |
| 8.508 | 5432.4424 | 248.1743 | 57.2047 | 49.19   |
|       | 9496.4922 |          |         |         |
